# Supplementary material
Source: publisher figshare collection journal article supplement (https://diabetesjournals.figshare.com/ndownloader/files/22979558)
Supplement: Supplementary file 1 [file 22979558]

**Supplemental Figures and Tables accompanying manuscript *Herzog et al. 2020 Metabolic effects of gastric bypass surgery - is it all about calories?***

**Table of Content**

|  |  | **Page(s)** |
| --- | --- | --- |
| Figure S1 | Changes in weight of individual participants over the study period | 2 |
| Figure S2 | Assessment of principal component analysis by (A) eigenvalues (scree plot) and (B) by coefficients of metabolites and lipids (loadings plot) | 3-4 |
| Figure S3 | Heatmap and box-and-whisker plots displaying significantly changed metabolites as determined by linear mixed-effect models (enlarged Fig. 2A) | 5 |
| Figure S4 | Principal component analysis using untargeted data: (A) scree plot and (B) score plots | 6 |
| Figure S5 | Heatmap displaying significantly changed metabolites as determined by linear mixed-effect models using untargeted data. | 7 |
|  |  |  |
| Table S1 | Anthropometric and clinical data of the study population for the different study occasions | 8 |
| Table S2 | Medications | 9 |
| Table S3 | Assessment of changes in anthropometric and clinical data elicited by VLCD, RYGB and the combined intervention | 10 |
| Table S4 | Identification levels of detected (A) metabolites and (B) lipids. | 11-12 |
| Table S5 | Evaluation of principal component scores of PCA | 13 |
| Table S6 | Linear-mixed-effect models fitted to (A) metabolomics and (B) lipidomics data between study occasions (fasting plasma samples) | 14-20 |
| Table S7 | Assessment of difference in (A) metabolomics and (B) lipidomics data between normoglycaemic and T2D patients (fasting plasma samples) | 21-27 |
| Table S8 | Evaluation of principal component scores using untargeted data | 28 |
| Table S9 | Assessment of associations and correlation analyses between (A) metabolites and (B) lipids and clinical parameters, respectively | 29-33 |
| Table S10 | Linear-mixed-effect models fitted to (A) metabolomics and (B) lipidomics data between study occasions (mixed-meal test) | 34-40 |
| Table S11 | Assessment of difference in (A) metabolomics and (B) lipidomics data between normoglycaemic and T2D patients (mixed-meal test) | 41-47 |

**Figure S1.** Changes in weight of individual participants over the study period.

Line plot depicting weight loss (in kg) by individual study participant at different time points of the study. VLCD, very low-calorie diet, RYGB (6w), 6 week after gastric bypass surgery.

**Figure S2A.** Assessment of principal component analysis by eigenvalues (scree plot).

**Metabolomics data Lipidomics data**

**
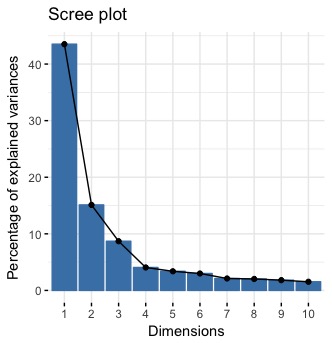

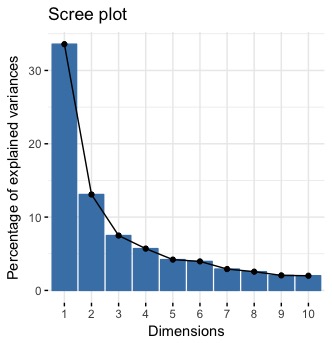
**

Scree plot of principal component analysis conducted on metabolomics data (left panel) and lipidomics data (right panel) derived from fasting plasma samples. Boxes depict eigenvalues of the first 10 principal components as boxplots shown as the percentage of variances explained by each principal component.

**Figure S2B.** Assessment of principal component analysis by coefficients of metabolites and lipids (loadings plot).

Metabolomics data Lipidomics data

Loading plot of principal component analysis conducted on metabolomics data (left panel) and lipidomics data (right panel) derived from fasting plasma samples. Boxes depict the coefficients for each variable for the second principal component.

**Figure S3.** Heatmap and box-and-whisker plots displaying significantly changed metabolites as determined by linear mixed-effect models.

Enlargement of Figure 2A with indication of individual metabolites (displayed on the left panel). See corresponding legend of Figure 2A for details.

**Figure S4.** Principal component analysis using untargeted data: (A) score plot and (B) assessment by eigenvalues, and (C) evaluation of scores.

Features were extracted in data generated in positive ESI mode for the pooled metabolite extracts. 820 features remained after filtering for S/N>10, >2 isotopes and gaussian peak shape (manual investigation). Next, these features were extracted from all samples. Features found in <15% of samples were excluded and peaks manually re-integrated, leaving a total of 719 features in the data. These data were subsequently processed and analysed as outlined for the identified metabolites.

**
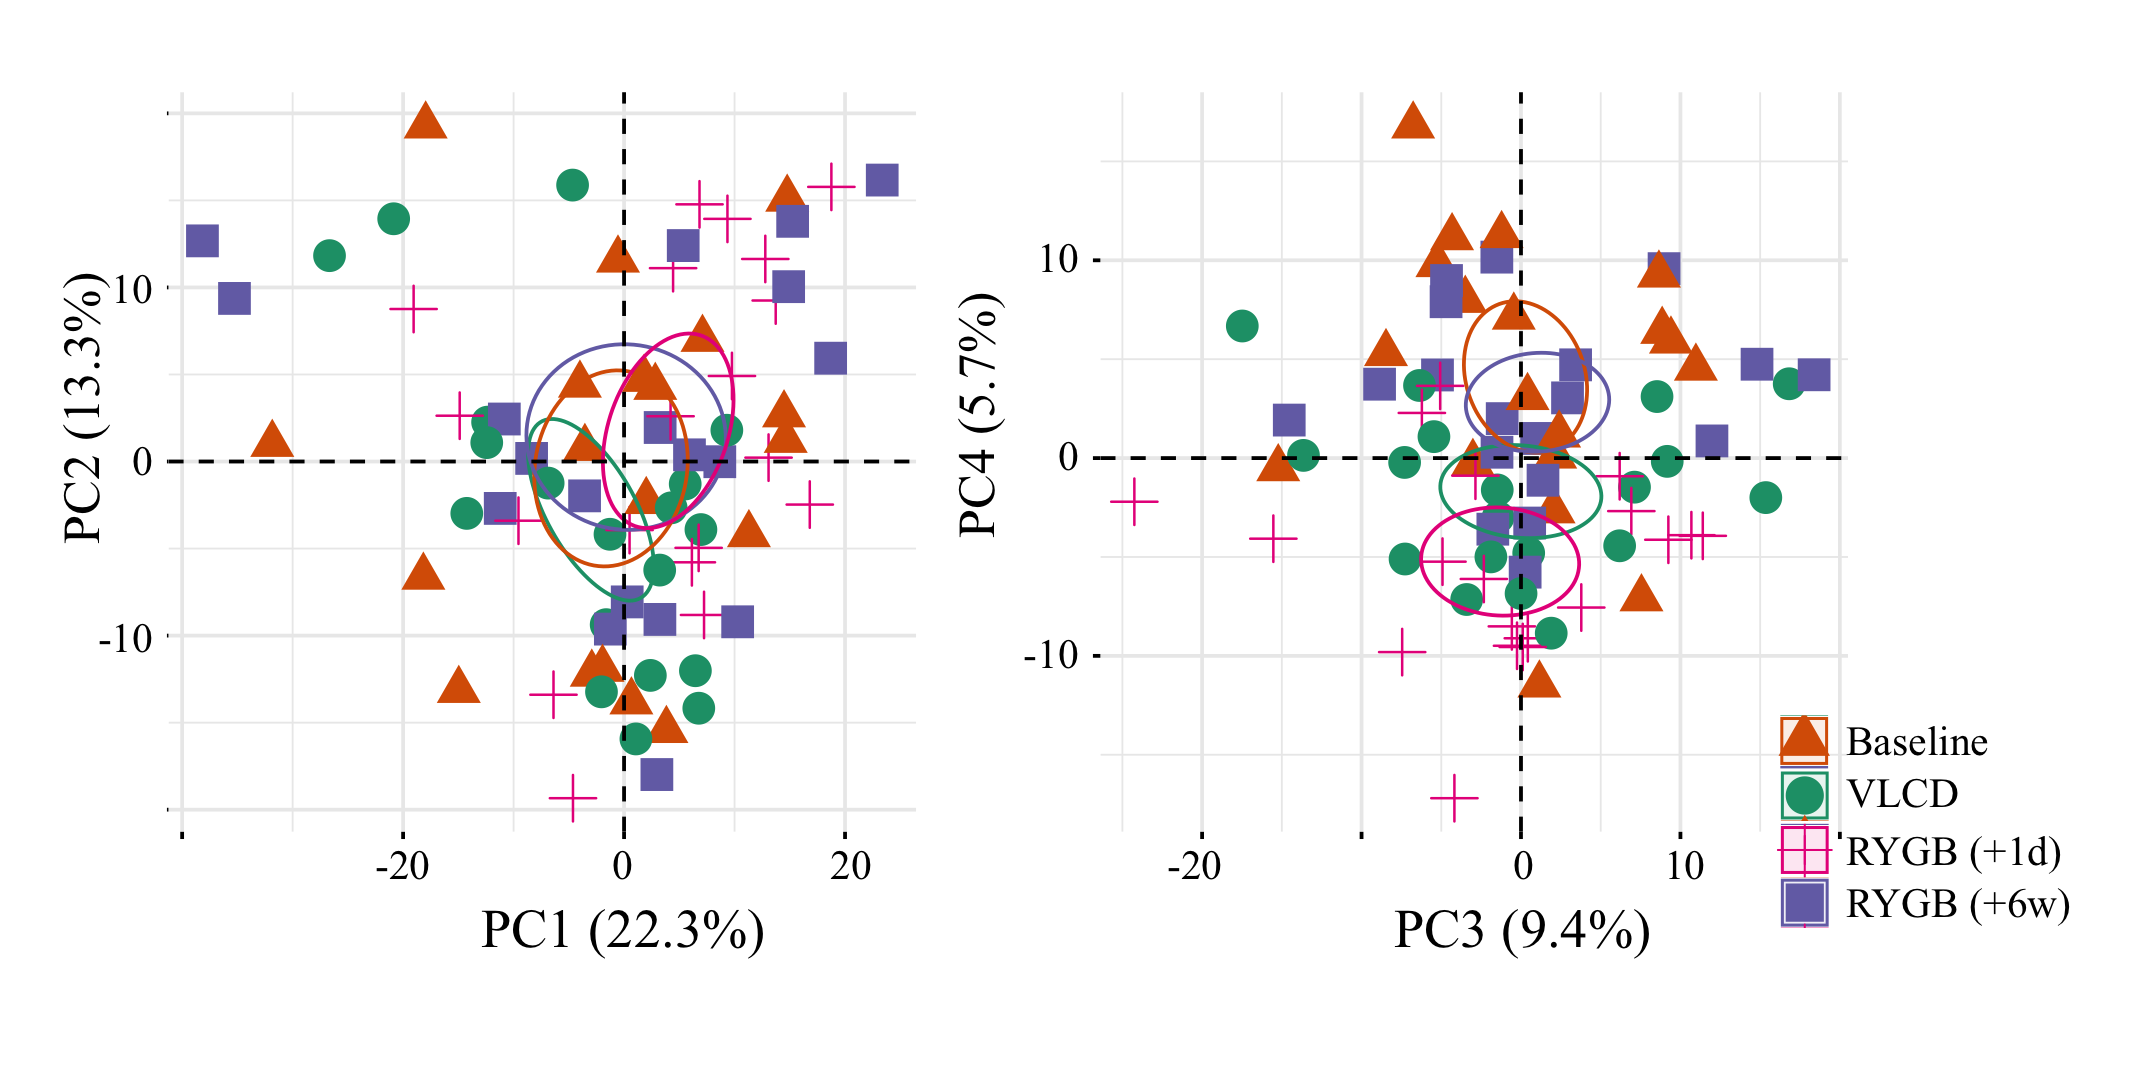
A Scree plot B PCA score plots**

Principal component analysis (PCA) conducted on untargeted data derived from fasting plasma samples. (A) Scree plot PCA; boxes depict eigenvalues of the first 10 principal components (PCs) as boxplots shown as the percentage of variances explained by each principal component. (B) Score scatter plot of PCA are shown; PC1 vs. PC2 (left panel) and PC3 vs. PC4 (right panel), and the percentage of explained variance by the components is indicated in parentheses. Ellipses show the 95% confidence regions of the indicated study occasions. Fasting plasma samples obtained at baseline (-4w) are depicted as orange triangles, samples obtained after the VLCD (-1d) are depicted as green circles, samples obtained immediately after surgery (+1d) are depicted as pink crosses, and samples obtained after at 6-week recovery period (+6w) are depicted as purple squares.

**Figure S5.** Heatmap displaying significantly changed metabolites as determined by linear mixed-effect models using untargeted data.


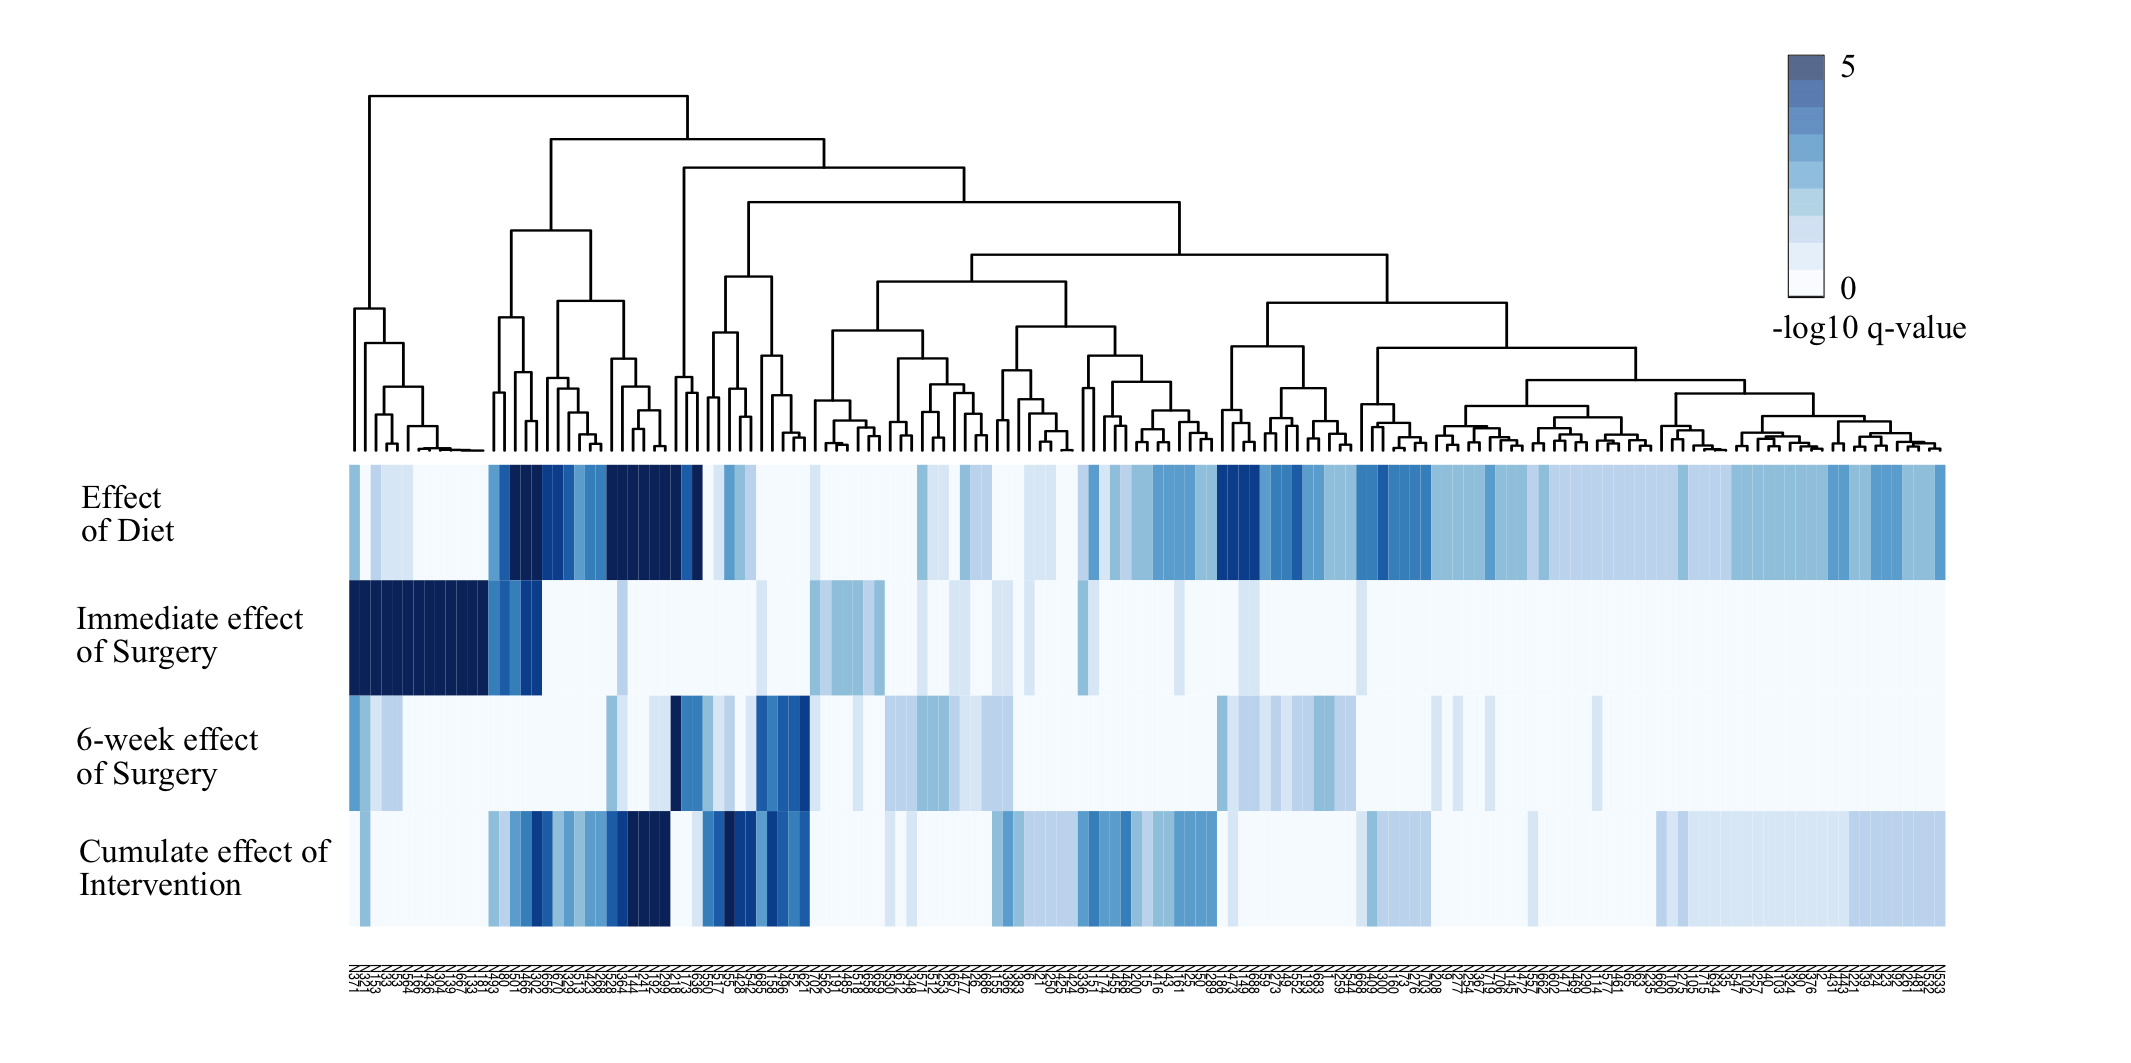


Metabolites as determined using untargeted metabolomics data with significant differences in response to the very low-calorie diet, the immediate effect of Roux-en-Y gastric bypass surgery, the 6-week effect of surgery, and the cumulative effect of the intervention as determined by linear mixed-effect models (LMMs) are displayed in a heatmap. Colour intensity reflects the –log10 q-values of the LMMs.

**Table S1.** Anthropometric and clinical data of the study population for the different study occasions.

|  | **Whole cohort** | | | | **Normoglycaemic patients** | | | | **T2D patients** | | | |
| --- | --- | --- | --- | --- | --- | --- | --- | --- | --- | --- | --- | --- |
|  | Baseline | VLCD | RYGB (+1d) | RYGB (+6w) | Baseline | VLCD | RYGB (+1d) | RYGB (+6w) | Baseline | VLCD | RYGB (+1d) | RYGB (+6w) |
| **N** | 19 | - | - | - | 9 | - | - | - | 10 | - | - | - |
| **Age** (Yr) # | 43.1 ± 6.3 | - | - | - | 40.4± 4.8 | - | - | - | 45.4 ± 6.6 | - | - | - |
| **Diabetes duration** (Yr) § | - | - | - | - | - | - | - | - | 2.0 (2.8) | - | - | - |
| **HbA1c** (mmol/mol) § | 41.0 (14.5) | - | - | - | 37.0 (2.0) ** | - | - | - | 51.0 (9.8) ** | - | - | - |
| **HbA1c** (%) § | 5.9 (3.5) |  |  |  | 5.5 (2.3) ** |  |  |  | 6.8 (3.1) ** |  |  |  |
| **Body weight** (kg) # | 112.8 ± 11.9 | 104.9 ± 10.9 | - | 94.3 ± 10.9 | 114.2 ± 10.4 | 106.5 ± 9.1 | - | 95.1 ± 10.0 | 111.6 ± 12.9 | 103.4 ± 12.2 | - | 93.7 ± 11.6 |
| **BMI** (kg/m2) # | 39.8 ± 3.3 | 37.0 ± 3.0 | - | 33.3 ± 3.1 | 40.2 ± 3.3 | 37.5 ± 3.0 | - | 33.5 ± 3.2 | 39.4 ± 3.3 | 36.5 ± 2.9 | - | 33.1 ± 3.0 |
| **Weight loss** (kg) § | - | 8.0 (3.0) | - | 10.3 (5.2) | - | 7.0 (3.6) | - | 10.3 (5.3) | - | 8.1 (2.1) | - | 10.6 (6.0) |
| **Fasting GIP** (pg) § | 175.4 (100.5) | 165.6 (66.2) | 104.2 (61.3) | 128.7 (72.9) | 184.9 (118.1) | 188.8 (85.1) | 99.6 (39.8) | 90.1 (72.9) | 158.1 (63.3) | 143.4 (75.3) | 107.2 (61.4) | 135.0 (81.9) |
| **Fasting GLP-1** (pM) § | 3.6 (1.2) | 3.6 (0.7) | 3.9 (11.2) | 4.8 (7.4) | 3.8 (1.6) | 3.6 (0.5) | 4.1 (14.3) | 4.2 (1.5) * | 3.5 (0.2) | 3.6 (0.8) | 3.6 (1.9) | 11.1 (13.8) * |
| **Fasting glucose** (mmol/L) § | 5.1 (1.3) | 5.8 (3.8) | 6.1 (3.0) | 6.1 (2.7) | 5.1 (1.0) | 6.7 (3.9) | 6.3 (3.1) | 6.0 (1.5) | 5.5 (2.7) | 5.7 (3.2) | 6.0 (2.4) | 6.8 (3.9) |
| **Fasting insulin** (uIU/mL) § | 18.3 (8.6) | 12.9 (4.8) | 15.6 (4.7) | 12.8 (5.9) | 18.3 (6.4) | 13.8 (7.2) | 15.3 (10.2) | 14.8 (7.0) | 18.0 (9.2) | 12.9 (3.8) | 18.0 (4.4) | 12.0 (4.5) |
| **HOMA-IR** § | 4.8 (2.9) | 3.5 (1.9) | 4.8 (2.2) | 4.9 (6.9) | 4.6 (1.6) | 3.6 (2.0) | 5.5 (2.4) | 4.0 (2.4) | 5.5 (3.2) | 3.1 (1.8) | 3.9 (1.9) | 6.0 (9.0) |
| **HOMA-B** § | 12.5 (10.1) | 5.3 (7.8) | 7.3 (8.2) | 8.2 (9.4) | 15.1 (13.7) | 6.7 (8.2) | 7.8 (10.9) | 11.2 (10.7) | 7.6 (10.2) | 4.8 (6.3) | 6.5 (4.9) | 4.1 (9.1) |

# mean ± SD; § median, IQR; * and **, p-value < 0.05 (*) and < 0.01 (**), respectively, estimating the difference between normoglycaemic and T2d patients as determined by Wilcoxon Rank Sum Test; BMI, body mass index; GIP, glucose-dependent insulinotropic polypeptide; GLP-1, glucagon-like peptide 1; HbA1c, haemoglobin A1c; HOMA-IR, homeostatic model assessment of insulin resistance; HOMA-B, homeostatic model assessment beta-cell function; RYGB (1d), Roux-en-Y gastric bypass surgery after Day 1; RYGB (6w), 6-weeks after surgery; VLCD, very low-calorie diet.

**Table S2.** Medications in T2D patients.

| **N** | **T2D treatment** |
| --- | --- |
| 2 | Dietary intervention only |
| 1 | Dietary intervention, insulin at times |
| 3 | Metformin only |
| 1 | Metformin, Insulin |
| 1 | Metformin, Glibenklamid |
| 1 | Insulin only |
| 1 | Insulin, Novorapid, Insulatard |

Overview of prescribed diabetes medications among T2D patients (N= 10). After surgery, none of the study participants obtained pharmacological treatment for diabetes. One individual was prescribed metformin again four years after surgery.

**Table S3.** Assessment of changes in anthropometric and clinical data elicited by VLCD, RYGB and the combined intervention.

|  | **Weight** | **BMI** | **Glucose** | **Insulin** | **HbA1c** | **GIP #** | **GLP-1 #** | **HOMA-IR #** | **HOMA-B #** | **Matsuda** | **Disposition index** |
| --- | --- | --- | --- | --- | --- | --- | --- | --- | --- | --- | --- |
| **VLCD vs. Baseline** | <0.0001 | <0.0001 | 0.1873 | 0.4149 | 1.0000 | 0.9979 | 0.9999 | 0.9783 | 0.0271 | 0.2160 | 0.9991 |
| **RYGB (1d) vs. VLCD** | 1.0000 | 1.0000 | 0.9923 | 0.9906 | 1.0000 | 0.0070 | 0.0850 | 0.9031 | 0.8106 | 0.0469 | 0.9979 |
| **RYGB (6w) vs. VLCD** | <0.0001 | <0.0001 | 0.4950 | 0.9586 | 1.0000 | 0.0057 | 0.9935 | 0.9979 | 0.3550 | 0.1541 | 0.7049 |
| **RYGB (6w) vs. Baseline** | <0.0001 | <0.0001 | 0.9719 | 0.8206 | 1.0000 | 0.0021 | 0.9986 | 0.9989 | 0.7573 | 0.9998 | 0.5555 |
| **T2D vs. ND** | 0.9754 | 0.9577 | 0.9916 | 0.9976 | <0.0001 | 0.2567 | 0.9885 | 1.0000 | 0.9844 | 0.9998 | 0.9871 |
|  |  |  |  |  |  |  |  |  |  |  |  |

Variation between individual participants was acknowledged by using linear mixed-effect models; differences in values are presented as p-value after adjustment for the multiple comparisons. BMI, body mass index; GIP, glucose-dependent insulinotropic polypeptide; GLP-1, glucagon-like peptide 1; HbA1c, haemoglobin A1c; HOMA-IR, homeostatic model assessment of insulin resistance; HOMA-B, homeostatic model assessment beta-cell function; #, log-2 transformed values were used for calculations (data were non-normal distributed); RYGB (1d), Roux-en-Y gastric bypass surgery after Day 1; RYGB (6w), 6-weeks after surgery; VLCD, very low-calorie diet.

**Table S4A.** Identification levels of detected metabolites.

| **Metabolite** | **ID level** | **Metabolite** | **ID level** | **Metabolite** | **ID level** | **Metabolite** | **ID level** | |
| --- | --- | --- | --- | --- | --- | --- | --- | --- |
| 1-Methyl-adenosine | 2b | Carnitine C4:0 | 2a | LPC 17:0 | 2a | PC 32:1 | 2a |
| 1-Methylhistidine | 2b | Carnitine C5:0 | 2a | LPC 18:0 | 2a | PC 34:1 | 2a |
| 2-Hydroxycinnamic acid | 2b | Carnitine C6:0 | 2a | LPC 18:1 | 2a | PC 34:2 | 2a |
| 3-Hydroxybutyrate | 1 | Carnitine C8:0 | 2a | LPC 18:2 | 2a | PC 36:2 | 2a |
| 5-Oxoproline | 2b | Carnitine C8:1 | 2a | LPC 19:0 | 2a | PC 36:3 | 2a |
| Acetylalanine | 2b | Citric acid | 2b | LPC 20:1 | 2a | PC 36:4 | 2a |
| Alanine | 1 | Creatine | 2b | LPC 20:2 | 2a | PC 38:5 | 2a |
| Arginine | 1 | Cystine | 1 | LPC 20:3 | 2a | PC 38:6 | 2a |
| Asparagine | 1 | Dihydroorotic acid | 2b | LPC 20:4 | 2a | PC 40:7 | 2a |
| Aspartic acid | 1 | Gluconic acid | 2b | LPC 20:5 | 2a | PC 40:8 | 2a |
| Caffeine | 1 | Glucosamine-6-phosphate | 2b | LPC 22:5 | 2a | Phenylalanine | 1 |
| Carnitine | 2b | Glutamic acid | 1 | LPC 22:6 | 2a | Proline | 1 |
| Carnitine C10:0 | 2a | Glutamine | 1 | LPE 16:0 | 2a | Serine | 1 |
| Carnitine C10:1 | 2a | Glyceric acid | 2b | LPE 18:0 | 2a | SM 32:1 | 2a |
| Carnitine C10:2 | 2a | Hippuric acid | 2b | LPE 18:1 | 2a | SM 32:2 | 2a |
| Carnitine C12:0 | 2a | Histidine | 1 | LPE 18:2 | 2a | SM 33:1 | 2a |
| Carnitine C12:1 | 2a | Hydroxyproline | 2b | LPE 20:0 | 2a | SM 34:1 | 2a |
| Carnitine C14:0 | 2a | Hypoxanthine | 2b | LPE 20:4 | 2a | SM 34:2 | 2a |
| Carnitine C14:1 | 2a | Indole | 2b | LPE 20:5 | 2a | SM 35:2 | 2a |
| Carnitine C14:2 | 2a | Kynurenine | 1 | LPE 22:6 | 2a | SM 36:2 | 2a |
| Carnitine C16:0 | 2a | Lactic acid | 2b | Lysine | 1 | Taurine | 2b |
| Carnitine C18:0 | 2a | Leucine-Isoleucine | 1 | Malic acid | 2b | Transcinnamic acid | 2b |
| Carnitine C18:1 | 2a | LPC 14:0 | 2a | Methionine | 1 | Tryptophan | 1 |
| Carnitine C18:2 | 2a | LPC 15:0 | 2a | Mevalonic acid | 2b | Tyrosine | 1 |
| Carnitine C2:0 | 2a | LPC 16:0 | 2a | Orotic acid | 2b | Uric acid | 2b |
| Carnitine C3:0 | 2a | LPC 16:1 | 2a | Paraxanthine | 1 | Valine | 1 |

| Level of identificating according to the Metabolomics Standards Initiative (Sumner et al, Metabolomics, 3, 2007) |
| --- |
| Level 1: Identified based on retention time and MS/MS spectrum of standard. |
| Level 2a: Putatively identified based MS/MS spectrum and structure-retention correlation (physicochemical properties) |
| Level 2b: Putatively identified based on MS/MS spectrum database searches (Metlin) |

**Table S4B.** Identification levels of detected lipids.

| **Lipid** | **ID level** | **Lipid** | **ID level** | **Lipid** | **ID level** |
| --- | --- | --- | --- | --- | --- |
| CE16.0* | 2a | PC38.3* | 2a | SM42.2* | 2a |
| CE18.1* | 2a | PC38.4* | 2a | SM42.3* | 2a |
| CE18.2* | 2a | PC38.5* | 2a | SM43.1* | 2a |
| CE18.3* | 2a | PC38.6* | 2a | SM43.2* | 2a |
| CE20.4* | 2a | PC40.4* | 2a | SM44.2* | 2a |
| LPC16.0* | 2a | PC40.5* | 2a | TG48.1* | 2a |
| LPC16.1* | 2a | PC40.6* | 2a | TG48.2* | 2a |
| LPC18.0* | 2a | SM32.1* | 2a | TG50.0* | 2a |
| LPC18.1* | 2a | SM32.2* | 2a | TG50.1* | 2a |
| LPC18.2* | 2a | SM33.1* | 2a | TG50.2* | 2a |
| LPC20.3* | 2a | SM34.1* | 2a | TG50.3* | 2a |
| LPC20.4* | 2a | SM34.2* | 2a | TG50.4* | 2a |
| LPC22.6* | 2a | SM35.1* | 2a | TG52.1* | 2a |
| PC32.0* | 2a | SM36.0* | 2a | TG52.2* | 2a |
| PC32.1* | 2a | SM36.1* | 2a | TG52.3* | 2a |
| PC32.2* | 2a | SM36.2* | 2a | TG52.4* | 2a |
| PC34.0* | 2a | SM38.1* | 2a | TG52.5* | 2a |
| PC34.1* | 2a | SM38.2* | 2a | TG54.3* | 2a |
| PC34.2* | 2a | SM39.1* | 2a | TG54.4* | 2a |
| PC34.3* | 2a | SM40.0* | 2a | TG54.5* | 2a |
| PC36.1* | 2a | SM40.1* | 2a | TG54.6* | 2a |
| PC36.2* | 2a | SM40.2* | 2a | TG56.6* | 2a |
| PC36.3* | 2a | SM41.1* | 2a |  |  |
| PC36.4* | 2a | SM41.2* | 2a |  |  |
| PC36.5* | 2a | SM42.1* | 2a |  |  |

| Level of identificating according to the Metabolomics Standards Initiative (Sumner et al, Metabolomics, 3, 2007) |
| --- |
| Level 1: Identified based on retention time and MS/MS spectrum of standard. |
| Level 2a: Putatively identified based MS/MS spectrum and structure-retention correlation (physicochemical properties) |
| Level 2b: Putatively identified based on MS/MS spectrum database searches (Metlin) |

**Table S5.** Evaluation of principal component scores as determined by PCA analysis.

**A.** PCA using metabolomics data **B.** PCA using lipidomics data

|  | **DIFF** | **LWR** | **UPR** | **P** |
| --- | --- | --- | --- | --- |
| Baseline-VLCD | -5.27 | -6.99 | -3.54 | <0.0001 |
| RYGB (6w)-VLCD | -2.24 | -3.97 | -0.52 | 0.0056 |
| RYGB (1d)-VLCD | 3.18 | 1.46 | 4.90 | <0.0001 |
| RYGB (6w)-Baseline | 3.03 | 1.32 | 4.73 | 0.0001 |
| RYGB (1d)-Baseline | 8.45 | 6.75 | 10.15 | <0.0001 |
| RYGB (1d)- RYGB (6w) | 5.42 | 3.72 | 7.13 | <0.0001 |

|  | **DIFF** | **LWR** | **UPR** | **P** |
| --- | --- | --- | --- | --- |
| Baseline- VLCD | -5.72 | -7.66 | -3.77 | <0.0001 |
| RYGB (6w)- VLCD | -1.05 | -2.99 | 0.90 | 0.4945 |
| RYGB (1d)- VLCD | 0.48 | -1.44 | 2.39 | 0.9142 |
| RYGB (6w)-Baseline | 4.67 | 2.70 | 6.64 | <0.0001 |
| RYGB (1d)-Baseline | 6.19 | 4.25 | 8.14 | <0.0001 |
| RYGB (1d)- RYGB (6w) | 1.52 | -0.42 | 3.47 | 0.1769 |

Analysis Of Variance (ANOVA) models were fitted using scores along principal component 2 for principal component analysis using (A) metabolomics data and (B) lipidomics data, followed by post-hoc analysis testing using Tukey Honest Significant Differences. DIFF, the difference in the observed means; LWR, lower end point of the interval; UPR, upper end point; P, p-value after adjustment for the multiple comparisons; RYGB (1d), Roux-en-Y gastric bypass surgery after Day 1; RYGB (6w), 6-weeks after surgery; VLCD, very low-calorie diet.

**Table 6A.** Linear-mixed-effect models fitted to metabolomics data between study occasions (fasting plasma samples).

|  | **Model 1**  **(adjusted for age)** | | | | **Model 2**  **(adj. for age and weight loss)** | | | | **Model 3**  **(adj. for age and insulin)** | | | | **Direction (Mean, SD)** | | | |
| --- | --- | --- | --- | --- | --- | --- | --- | --- | --- | --- | --- | --- | --- | --- | --- | --- |
|  | **Effect VLCD** | **RYGB (1d)** | **RYGB (6w)** | **Cum.**  **effect** | **Effect VLCD** | **RYGB (1d)** | **RYGB (6w)** | **Cum.**  **effect** | **Effect VLCD** | **RYGB (1d)** | **RYGB (6w)** | **Cum.**  **effect** | **Effect of VLCD** | **RYGB**  **(1d)** | **RYGB (6w)** | **Cum. effect** |
| **1-Methyl-adenosine** | 0.348 | 0.995 | 0.944 | 0.782 | 0.301 | 0.884 | 0.999 | 0.635 | 0.363 | 0.994 | 0.945 | 0.788 | 0.24 ± 0.49 | -0.29 ± 0.62 | -0.19 ± 0.5 | 0.05 ± 0.48 |
| **1-Methylhistidine** | 0.089 | 0.782 | 0.029 | 0.991 | 0.344 | 0.908 | 0.066 | 1.000 | 0.078 | 0.763 | 0.031 | 0.997 | -0.77 ± 1.92 | -0.07 ± 1.83 | 0.75 ± 1.97 | -0.02 ± 0.65 |
| **2-Hydroxy-**  **cinnamic acid** | 0.649 | 0.132 | 0.261 | 0.958 | 0.737 | 0.602 | 0.443 | 1.000 | 0.738 | 0.122 | 0.268 | 0.931 | -0.01 ± 0.46 | 0.13 ± 0.35 | -0.33 ± 0.34 | -0.34 ± 0.5 |
| **3-Hydroxybutyrate** | 0.000 | 0.000 | 0.000 | 0.392 | 0.000 | 0.006 | 0.000 | 0.979 | 0.000 | 0.000 | 0.000 | 0.493 | 1.25 ± 0.63 | 0.77 ± 0.51 | -1.08 ± 0.56 | 0.17 ± 0.73 |
| **5-Oxoproline** | 0.995 | 0.703 | 0.234 | 0.112 | 1.000 | 0.814 | 0.380 | 0.756 | 0.999 | 0.684 | 0.234 | 0.151 | 0.24 ± 1.04 | 0.07 ± 1.21 | 0.48 ± 1.08 | 0.73 ± 0.87 |
| **Acetylalanine** | 0.404 | 0.135 | 0.057 | 0.839 | 0.838 | 0.279 | 0.070 | 0.886 | 0.307 | 0.158 | 0.054 | 0.916 | -0.46 ± 0.74 | -0.6 ± 0.62 | 0.63 ± 0.76 | 0.17 ± 0.68 |
| **Alanine** | 0.319 | 0.324 | 0.632 | 0.981 | 0.693 | 0.697 | 0.662 | 1.000 | 0.297 | 0.315 | 0.632 | 0.972 | -0.56 ± 1.59 | 0.37 ± 1.83 | 0.17 ± 1.66 | -0.38 ± 0.74 |
| **Arginine** | 0.033 | 0.044 | 0.063 | 0.999 | 0.602 | 0.648 | 0.040 | 0.957 | 0.027 | 0.042 | 0.067 | 0.995 | -0.52 ± 1.38 | 0.39 ± 1.35 | 0.56 ± 1.33 | 0.04 ± 0.45 |
| **Asparagine** | 0.256 | 0.016 | 0.246 | 1.000 | 0.780 | 0.292 | 0.237 | 0.993 | 0.197 | 0.014 | 0.247 | 1.000 | -0.33 ± 1.43 | 0.62 ± 1.5 | 0.28 ± 1.48 | -0.05 ± 0.32 |
| **Aspartic acid** | 0.984 | 0.940 | 0.734 | 0.419 | 0.984 | 0.612 | 0.976 | 1.000 | 0.986 | 0.941 | 0.738 | 0.444 | -0.06 ± 1.51 | 0.06 ± 1.21 | -0.12 ± 1.44 | -0.18 ± 1.33 |
| **Caffeine** | 1.000 | 0.000 | 0.485 | 0.594 | 0.998 | 0.001 | 0.659 | 0.979 | 0.999 | 0.000 | 0.490 | 0.686 | -0.42 ± 2.29 | -3.34 ± 2.45 | -1.29 ± 2.52 | -1.71 ± 2.66 |
| **Carnitine** | 0.587 | 0.000 | 0.420 | 0.017 | 0.995 | 0.002 | 0.759 | 0.845 | 0.505 | 0.000 | 0.442 | 0.014 | -0.15 ± 0.2 | 0.66 ± 0.36 | -0.07 ± 0.29 | -0.22 ± 0.26 |
| **Carnitine C10:0** | 0.000 | 0.000 | 0.974 | 0.000 | 0.006 | 0.020 | 0.980 | 0.112 | 0.000 | 0.000 | 0.981 | 0.001 | 0.88 ± 1.07 | -1.28 ± 0.69 | -0.2 ± 0.72 | 0.68 ± 1.09 |
| **Carnitine C10:1** | 0.000 | 0.000 | 0.323 | 0.001 | 0.000 | 0.002 | 0.509 | 0.106 | 0.000 | 0.000 | 0.358 | 0.004 | 0.74 ± 0.87 | -1.09 ± 0.49 | -0.32 ± 0.56 | 0.42 ± 0.8 |
| **Carnitine C10:2** | 0.092 | 0.002 | 0.802 | 0.593 | 0.456 | 0.079 | 0.822 | 0.959 | 0.090 | 0.001 | 0.800 | 0.570 | 0.17 ± 0.52 | -0.63 ± 0.48 | -0.22 ± 0.46 | -0.05 ± 0.63 |
| **Carnitine C12:0** | 0.000 | 0.002 | 0.455 | 0.004 | 0.003 | 0.055 | 0.584 | 0.243 | 0.000 | 0.004 | 0.481 | 0.024 | 0.91 ± 0.96 | -1.04 ± 0.65 | -0.53 ± 0.65 | 0.38 ± 0.96 |
| **Carnitine C12:1** | 0.000 | 0.020 | 0.101 | 0.003 | 0.000 | 0.094 | 0.262 | 0.109 | 0.000 | 0.036 | 0.110 | 0.015 | 1.14 ± 1.14 | -0.77 ± 0.7 | -0.64 ± 0.64 | 0.5 ± 0.98 |
| **Carnitine C14:0** | 0.000 | 0.321 | 0.026 | 0.008 | 0.000 | 0.499 | 0.085 | 0.194 | 0.000 | 0.434 | 0.023 | 0.038 | 0.88 ± 0.72 | -0.46 ± 0.48 | -0.66 ± 0.47 | 0.23 ± 0.72 |
| **Carnitine C14:1** | 0.000 | 0.083 | 0.266 | 0.000 | 0.000 | 0.399 | 0.354 | 0.095 | 0.000 | 0.151 | 0.286 | 0.001 | 1.34 ± 1.03 | -0.64 ± 0.59 | -0.62 ± 0.62 | 0.72 ± 0.9 |
| **Carnitine C14:2** | 0.000 | 0.077 | 0.142 | 0.004 | 0.001 | 0.390 | 0.213 | 0.317 | 0.000 | 0.145 | 0.173 | 0.034 | 1.04 ± 0.97 | -0.58 ± 0.64 | -0.55 ± 0.6 | 0.49 ± 0.8 |
| **Carnitine C16:0** | 0.000 | 0.999 | 0.188 | 0.000 | 0.000 | 0.975 | 0.400 | 0.013 | 0.000 | 1.000 | 0.193 | 0.000 | 0.8 ± 0.6 | -0.14 ± 0.42 | -0.41 ± 0.43 | 0.38 ± 0.6 |
| **Carnitine C18:0** | 0.001 | 0.994 | 0.756 | 0.055 | 0.023 | 0.964 | 0.912 | 0.305 | 0.012 | 1.000 | 0.772 | 0.196 | 0.36 ± 0.56 | -0.11 ± 0.36 | -0.18 ± 0.42 | 0.18 ± 0.53 |
| **Carnitine C18:1** | 0.000 | 0.860 | 0.247 | 0.000 | 0.000 | 0.963 | 0.327 | 0.003 | 0.000 | 0.951 | 0.276 | 0.000 | 1.1 ± 0.65 | -0.22 ± 0.41 | -0.42 ± 0.47 | 0.68 ± 0.58 |
| **Carnitine C18:2** | 0.000 | 0.487 | 0.012 | 0.001 | 0.000 | 0.629 | 0.046 | 0.077 | 0.000 | 0.671 | 0.019 | 0.008 | 0.78 ± 0.55 | -0.27 ± 0.41 | -0.5 ± 0.47 | 0.28 ± 0.47 |
| **Carnitine C2:0** | 0.000 | 0.003 | 0.001 | 0.848 | 0.022 | 0.021 | 0.001 | 1.000 | 0.000 | 0.002 | 0.001 | 0.970 | 0.89 ± 0.48 | 0.63 ± 0.46 | -0.66 ± 0.48 | 0.23 ± 0.53 |
| **Carnitine C3:0** | 0.999 | 0.999 | 0.004 | 0.008 | 0.885 | 0.975 | 0.043 | 0.820 | 1.000 | 0.999 | 0.004 | 0.007 | -0.2 ± 0.51 | 0.12 ± 0.5 | -0.33 ± 0.53 | -0.52 ± 0.57 |
| **Carnitine C4:0** | 0.223 | 0.935 | 0.738 | 0.890 | 0.975 | 0.584 | 0.446 | 0.979 | 0.416 | 0.886 | 0.748 | 0.978 | 0.24 ± 0.64 | 0 ± 0.54 | -0.22 ± 0.55 | 0.02 ± 0.73 |
| **Carnitine C5:0** | 0.673 | 0.773 | 0.004 | 0.144 | 0.856 | 0.944 | 0.015 | 0.739 | 0.773 | 0.748 | 0.004 | 0.123 | 0.18 ± 0.65 | 0.3 ± 0.69 | -0.8 ± 0.63 | -0.61 ± 0.73 |
| **Carnitine C6:0** | 0.000 | 0.332 | 0.030 | 0.012 | 0.000 | 0.643 | 0.074 | 0.349 | 0.000 | 0.431 | 0.038 | 0.044 | 0.84 ± 0.82 | -0.34 ± 0.65 | -0.51 ± 0.44 | 0.33 ± 0.68 |
| **Carnitine C8:0** | 0.000 | 0.000 | 0.706 | 0.001 | 0.004 | 0.022 | 0.754 | 0.207 | 0.000 | 0.000 | 0.731 | 0.006 | 0.84 ± 1.01 | -1.12 ± 0.63 | -0.29 ± 0.65 | 0.55 ± 0.95 |
| **Carnitine C8:1** | 0.247 | 0.006 | 0.996 | 0.118 | 0.742 | 0.187 | 1.000 | 0.819 | 0.221 | 0.006 | 0.996 | 0.106 | 0.05 ± 0.8 | -0.75 ± 0.49 | -0.07 ± 0.55 | -0.02 ± 0.85 |
| **Citric acid** | 0.081 | 1.000 | 0.985 | 0.232 | 0.400 | 1.000 | 0.985 | 0.805 | 0.121 | 1.000 | 0.987 | 0.300 | 0.59 ± 0.99 | -0.23 ± 0.73 | -0.31 ± 0.81 | 0.27 ± 0.98 |
| **Creatine** | 0.004 | 0.012 | 0.608 | 0.166 | 0.145 | 0.239 | 0.573 | 0.866 | 0.003 | 0.011 | 0.605 | 0.147 | -1.13 ± 1.6 | 1 ± 1.68 | 0.4 ± 1.63 | -0.73 ± 0.78 |
| **Cystine** | 0.284 | 0.456 | 0.939 | 0.717 | 0.569 | 0.709 | 0.962 | 0.931 | 0.340 | 0.480 | 0.942 | 0.770 | -0.49 ± 2.01 | 0.22 ± 1.9 | 0.19 ± 1.74 | -0.3 ± 0.83 |
| **Dihydroorotic acid** | 1.000 | 0.803 | 0.533 | 0.657 | 1.000 | 0.912 | 0.641 | 0.954 | 0.999 | 0.795 | 0.539 | 0.716 | -0.15 ± 1.65 | 0.09 ± 1.12 | 0.14 ± 1.42 | -0.01 ± 1.22 |
| **Gluconic acid** | 0.993 | 0.779 | 0.793 | 0.544 | 0.856 | 0.990 | 0.999 | 0.969 | 0.983 | 0.754 | 0.795 | 0.489 | 0.02 ± 1.36 | 0.19 ± 1.55 | -0.8 ± 2.05 | -0.78 ± 1.73 |
| **Glucosamine-**  **6-phosphate** | 0.270 | 0.378 | 0.035 | 0.869 | 0.564 | 0.660 | 0.068 | 0.982 | 0.269 | 0.378 | 0.036 | 0.889 | -0.3 ± 2.04 | -0.14 ± 2.32 | 0.46 ± 2.17 | 0.16 ± 0.6 |
| **Glutamic acid** | 0.878 | 0.966 | 0.787 | 1.000 | 0.996 | 1.000 | 0.738 | 0.989 | 0.917 | 0.973 | 0.795 | 0.999 | -0.23 ± 1.52 | -0.04 ± 1.93 | 0.06 ± 1.52 | -0.17 ± 0.85 |
| **Glutamine** | 0.268 | 0.092 | 0.147 | 0.997 | 0.671 | 0.435 | 0.187 | 0.996 | 0.223 | 0.086 | 0.149 | 1.000 | -0.36 ± 1.8 | 0.45 ± 1.89 | 0.44 ± 1.86 | 0.08 ± 0.32 |
| **Glyceric acid** | 0.021 | 0.000 | 0.645 | 0.396 | 0.031 | 0.002 | 0.929 | 0.325 | 0.021 | 0.000 | 0.644 | 0.377 | 0.7 ± 0.71 | -1.02 ± 0.68 | -0.49 ± 0.56 | 0.2 ± 0.93 |
| **Hippuric acid** | 0.974 | 0.013 | 0.885 | 0.556 | 1.000 | 0.303 | 0.972 | 0.994 | 0.960 | 0.013 | 0.890 | 0.525 | -0.55 ± 1.49 | -1.18 ± 0.8 | 0.79 ± 1.13 | 0.24 ± 1.28 |
| **Histidine** | 0.032 | 0.128 | 0.077 | 0.996 | 0.372 | 0.617 | 0.083 | 1.000 | 0.032 | 0.127 | 0.080 | 0.994 | -0.61 ± 1.72 | 0.32 ± 1.75 | 0.5 ± 1.67 | -0.11 ± 0.33 |
| **Hydroxyproline** | 0.926 | 0.908 | 0.997 | 0.988 | 0.992 | 0.942 | 0.995 | 1.000 | 0.972 | 0.880 | 0.998 | 0.998 | 0.29 ± 1.14 | 0.16 ± 0.94 | -0.28 ± 1.28 | 0.01 ± 1.42 |
| **Hypoxanthine** | 0.993 | 0.006 | 0.992 | 1.000 | 0.971 | 0.197 | 1.000 | 0.996 | 1.000 | 0.006 | 0.994 | 0.999 | 0.07 ± 0.77 | 1.68 ± 1.86 | 0.1 ± 1.55 | 0.17 ± 1.3 |
| **Indole** | 0.670 | 0.370 | 0.149 | 0.839 | 0.795 | 0.777 | 0.267 | 0.994 | 0.662 | 0.386 | 0.152 | 0.863 | 0.09 ± 0.47 | 0.03 ± 0.44 | -0.39 ± 0.55 | -0.3 ± 0.61 |
| **Kynurenine** | 0.598 | 0.176 | 0.009 | 0.296 | 0.564 | 0.255 | 0.057 | 0.986 | 0.653 | 0.190 | 0.010 | 0.299 | 0.14 ± 0.4 | -0.43 ± 0.34 | -0.38 ± 0.4 | -0.24 ± 0.4 |
| **Lactic acid** | 0.829 | 0.997 | 0.496 | 0.979 | 0.929 | 0.998 | 0.615 | 0.999 | 0.850 | 0.998 | 0.503 | 0.978 | -0.03 ± 0.48 | -0.07 ± 0.32 | -0.22 ± 0.32 | -0.25 ± 0.42 |
| **Leucine-Isoleucine** | 0.022 | 0.999 | 0.107 | 0.966 | 0.102 | 0.990 | 0.224 | 0.957 | 0.041 | 1.000 | 0.109 | 0.991 | 0.17 ± 0.27 | -0.04 ± 0.39 | -0.24 ± 0.27 | -0.07 ± 0.27 |
| **LPC 14:0** | 0.001 | 0.259 | 1.000 | 0.002 | 0.170 | 0.284 | 0.987 | 0.559 | 0.002 | 0.266 | 1.000 | 0.003 | -1.04 ± 0.76 | -0.61 ± 0.48 | 0.11 ± 0.64 | -0.93 ± 0.8 |
| **LPC 15:0** | 1.000 | 0.529 | 0.933 | 0.865 | 1.000 | 0.649 | 0.980 | 0.999 | 0.997 | 0.571 | 0.937 | 0.815 | -0.22 ± 0.57 | -0.46 ± 0.48 | -0.06 ± 0.61 | -0.28 ± 0.65 |
| **LPC 16:0** | 0.040 | 0.534 | 0.357 | 0.815 | 0.243 | 0.796 | 0.442 | 0.972 | 0.085 | 0.605 | 0.379 | 0.917 | 0.11 ± 0.26 | -0.17 ± 0.23 | -0.12 ± 0.25 | -0.01 ± 0.23 |
| **LPC 16:1** | 0.960 | 0.762 | 0.774 | 0.988 | 0.947 | 0.813 | 0.895 | 1.000 | 0.988 | 0.802 | 0.783 | 0.968 | -0.13 ± 0.74 | -0.39 ± 0.49 | -0.19 ± 0.64 | -0.32 ± 0.76 |
| **LPC 17:0** | 0.999 | 0.822 | 1.000 | 1.000 | 0.991 | 0.851 | 1.000 | 0.994 | 1.000 | 0.903 | 1.000 | 0.999 | -0.13 ± 0.61 | -0.42 ± 0.51 | 0.03 ± 0.59 | -0.1 ± 0.68 |
| **LPC 18:0** | 0.606 | 0.392 | 0.995 | 0.824 | 0.904 | 0.627 | 0.992 | 0.993 | 0.434 | 0.476 | 0.994 | 0.673 | -0.49 ± 0.73 | -0.54 ± 0.54 | 0.12 ± 0.61 | -0.37 ± 0.69 |
| **LPC 18:1** | 0.812 | 0.947 | 0.899 | 0.302 | 0.999 | 1.000 | 0.986 | 0.985 | 0.974 | 0.982 | 0.893 | 0.580 | 0 ± 0.52 | -0.26 ± 0.46 | 0.06 ± 0.53 | 0.06 ± 0.57 |
| **LPC 18:2** | 0.951 | 0.739 | 0.979 | 1.000 | 0.987 | 0.912 | 0.984 | 1.000 | 0.984 | 0.787 | 0.982 | 1.000 | -0.1 ± 0.53 | -0.42 ± 0.56 | -0.17 ± 0.59 | -0.27 ± 0.68 |
| **LPC 19:0** | 0.971 | 0.999 | 0.837 | 0.993 | 0.990 | 1.000 | 0.883 | 1.000 | 0.960 | 0.999 | 0.836 | 0.997 | -0.39 ± 0.74 | 0.01 ± 0.61 | 0.33 ± 0.71 | -0.06 ± 0.83 |
| **LPC 20:1** | 0.902 | 0.690 | 0.478 | 0.106 | 0.999 | 0.976 | 0.695 | 0.843 | 0.986 | 0.782 | 0.483 | 0.232 | -0.08 ± 0.44 | -0.22 ± 0.56 | 0.21 ± 0.5 | 0.13 ± 0.58 |
| **LPC 20:2** | 0.581 | 0.996 | 0.996 | 0.371 | 0.963 | 0.964 | 1.000 | 0.978 | 0.412 | 0.999 | 0.997 | 0.241 | -0.3 ± 0.49 | -0.05 ± 0.34 | 0.04 ± 0.41 | -0.26 ± 0.48 |
| **LPC 20:3** | 0.834 | 0.976 | 1.000 | 0.905 | 1.000 | 0.765 | 0.969 | 0.994 | 0.806 | 0.981 | 1.000 | 0.883 | -0.49 ± 0.84 | -0.42 ± 0.65 | -0.11 ± 0.83 | -0.6 ± 0.96 |
| **LPC 20:4** | 0.001 | 0.999 | 0.999 | 0.003 | 0.088 | 0.995 | 0.997 | 0.364 | 0.002 | 0.999 | 0.999 | 0.004 | 0.56 ± 0.63 | -0.16 ± 0.66 | -0.27 ± 0.68 | 0.29 ± 0.83 |
| **LPC 20:5** | 0.778 | 0.996 | 0.781 | 1.000 | 0.998 | 0.999 | 0.662 | 0.977 | 0.791 | 0.996 | 0.785 | 1.000 | -0.67 ± 0.88 | -0.13 ± 0.61 | -0.02 ± 0.92 | -0.68 ± 1.19 |
| **LPC 22:5** | 0.630 | 1.000 | 1.000 | 0.569 | 0.807 | 0.999 | 1.000 | 0.871 | 0.772 | 1.000 | 1.000 | 0.708 | 0.13 ± 0.78 | -0.24 ± 0.64 | -0.12 ± 0.84 | 0.01 ± 0.85 |
| **LPC 22:6** | 0.018 | 0.999 | 0.995 | 0.006 | 0.117 | 0.995 | 0.989 | 0.184 | 0.031 | 1.000 | 0.995 | 0.010 | 0.44 ± 0.68 | -0.3 ± 0.66 | -0.18 ± 0.73 | 0.25 ± 0.87 |
| **LPE 16:0** | 0.058 | 0.716 | 0.785 | 0.002 | 0.585 | 0.659 | 0.942 | 0.500 | 0.056 | 0.744 | 0.792 | 0.002 | 0.18 ± 0.53 | 0.1 ± 0.39 | 0.03 ± 0.48 | 0.21 ± 0.54 |
| **LPE 18:0** | 1.000 | 0.520 | 0.932 | 0.860 | 1.000 | 0.647 | 0.979 | 0.999 | 0.997 | 0.562 | 0.937 | 0.808 | -0.22 ± 0.56 | -0.46 ± 0.48 | -0.06 ± 0.61 | -0.28 ± 0.65 |
| **LPE 18:1** | 0.791 | 0.999 | 0.981 | 0.977 | 0.684 | 0.996 | 1.000 | 0.883 | 0.718 | 1.000 | 0.980 | 0.951 | -0.31 ± 0.46 | -0.08 ± 0.35 | 0.03 ± 0.39 | -0.28 ± 0.53 |
| **LPE 18:2** | 0.527 | 0.986 | 0.999 | 0.686 | 0.660 | 1.000 | 1.000 | 0.843 | 0.550 | 0.987 | 0.999 | 0.702 | -0.48 ± 0.6 | -0.17 ± 0.42 | -0.01 ± 0.51 | -0.49 ± 0.68 |
| **LPE 20:0** | 0.998 | 0.826 | 1.000 | 0.991 | 0.994 | 0.877 | 0.999 | 0.988 | 1.000 | 0.904 | 1.000 | 1.000 | -0.12 ± 0.59 | -0.36 ± 0.45 | 0.05 ± 0.53 | -0.07 ± 0.64 |
| **LPE 20:4** | 0.000 | 0.905 | 0.980 | 0.002 | 0.129 | 0.644 | 0.863 | 0.675 | 0.000 | 0.912 | 0.980 | 0.002 | 0.32 ± 0.51 | 0.06 ± 0.38 | -0.13 ± 0.39 | 0.19 ± 0.46 |
| **LPE 20:5** | 0.032 | 0.998 | 0.470 | 0.669 | 0.519 | 0.998 | 0.375 | 1.000 | 0.045 | 0.998 | 0.479 | 0.715 | -0.92 ± 0.8 | -0.04 ± 0.42 | 0.15 ± 0.66 | -0.77 ± 0.89 |
| **LPE 22:6** | 0.001 | 0.119 | 0.992 | 0.000 | 0.094 | 0.281 | 0.999 | 0.215 | 0.001 | 0.137 | 0.993 | 0.000 | 0.3 ± 0.53 | 0.29 ± 0.37 | -0.08 ± 0.43 | 0.22 ± 0.58 |
| **Lysine** | 0.122 | 0.041 | 0.237 | 0.997 | 0.600 | 0.399 | 0.224 | 1.000 | 0.106 | 0.039 | 0.237 | 0.992 | -0.46 ± 1.51 | 0.47 ± 1.66 | 0.28 ± 1.56 | -0.18 ± 0.39 |
| **Malic acid** | 0.362 | 0.745 | 0.662 | 0.985 | 0.639 | 0.886 | 0.739 | 0.997 | 0.431 | 0.770 | 0.670 | 0.993 | 0.38 ± 1.04 | -0.23 ± 0.87 | -0.29 ± 0.81 | 0.09 ± 0.83 |
| **Methionine** | 0.020 | 0.000 | 0.638 | 0.397 | 0.013 | 0.042 | 0.972 | 0.179 | 0.036 | 0.000 | 0.650 | 0.497 | 0.16 ± 0.47 | 0.53 ± 0.33 | -0.25 ± 0.4 | -0.09 ± 0.44 |
| **Mevalonic acid** | 0.768 | 0.845 | 1.000 | 0.830 | 0.663 | 0.999 | 1.000 | 0.751 | 0.864 | 0.808 | 1.000 | 0.906 | 0.14 ± 0.61 | 0.11 ± 0.46 | -0.03 ± 0.54 | 0.11 ± 0.58 |
| **Orotic acid** | 0.275 | 0.969 | 0.012 | 0.671 | 0.376 | 0.919 | 0.052 | 0.998 | 0.224 | 0.958 | 0.013 | 0.771 | -0.82 ± 1.53 | 0.01 ± 1 | 1.12 ± 1.57 | 0.3 ± 1.23 |
| **Paraxanthine** | 0.637 | 0.006 | 0.105 | 0.789 | 0.481 | 0.020 | 0.342 | 1.000 | 0.540 | 0.005 | 0.106 | 0.882 | 0.24 ± 2.02 | -1.9 ± 1.91 | -1.5 ± 2.22 | -1.25 ± 1.96 |
| **PC 32:1** | 0.366 | 0.852 | 0.913 | 0.069 | 1.000 | 0.987 | 1.000 | 1.000 | 0.381 | 0.852 | 0.916 | 0.078 | -0.47 ± 0.69 | 0 ± 0.35 | -0.15 ± 0.57 | -0.63 ± 0.7 |
| **PC 34:1** | 0.335 | 0.413 | 0.999 | 0.231 | 0.193 | 0.997 | 0.941 | 0.199 | 0.513 | 0.357 | 0.999 | 0.370 | 0.12 ± 0.45 | 0.07 ± 0.34 | -0.07 ± 0.45 | 0.04 ± 0.5 |
| **PC 34:2** | 0.292 | 0.998 | 0.352 | 1.000 | 0.149 | 0.765 | 0.804 | 0.756 | 0.470 | 1.000 | 0.363 | 1.000 | 0.08 ± 0.34 | -0.13 ± 0.27 | -0.22 ± 0.34 | -0.14 ± 0.38 |
| **PC 36:2** | 0.406 | 0.471 | 0.963 | 0.801 | 1.000 | 0.164 | 0.685 | 0.953 | 0.316 | 0.529 | 0.960 | 0.706 | -0.45 ± 0.61 | -0.44 ± 0.4 | 0.07 ± 0.55 | -0.38 ± 0.54 |
| **PC 36:3** | 0.412 | 0.891 | 0.970 | 0.786 | 0.912 | 0.842 | 0.926 | 1.000 | 0.329 | 0.919 | 0.967 | 0.699 | -0.32 ± 0.47 | -0.26 ± 0.31 | 0.06 ± 0.39 | -0.26 ± 0.43 |
| **PC 36:4** | 0.000 | 0.959 | 0.421 | 0.002 | 0.003 | 0.966 | 0.456 | 0.290 | 0.000 | 0.953 | 0.427 | 0.003 | 0.36 ± 0.4 | -0.01 ± 0.27 | -0.23 ± 0.25 | 0.14 ± 0.38 |
| **PC 38:5** | 0.968 | 0.999 | 0.960 | 0.689 | 0.994 | 1.000 | 0.977 | 0.961 | 0.989 | 1.000 | 0.959 | 0.784 | -0.16 ± 0.62 | -0.16 ± 0.29 | 0.03 ± 0.48 | -0.13 ± 0.6 |
| **PC 38:6** | 0.001 | 1.000 | 0.995 | 0.002 | 0.005 | 0.934 | 1.000 | 0.041 | 0.001 | 1.000 | 0.996 | 0.005 | 0.5 ± 0.63 | -0.16 ± 0.43 | -0.16 ± 0.48 | 0.34 ± 0.66 |
| **PC 40:7** | 0.080 | 1.000 | 0.999 | 0.042 | 0.334 | 1.000 | 0.999 | 0.465 | 0.097 | 1.000 | 0.999 | 0.051 | 0.18 ± 0.48 | -0.11 ± 0.36 | -0.08 ± 0.44 | 0.1 ± 0.52 |
| **PC 40:8** | 0.498 | 0.540 | 0.294 | 0.996 | 0.912 | 0.927 | 0.288 | 0.977 | 0.481 | 0.534 | 0.299 | 0.998 | -0.33 ± 0.49 | 0.36 ± 0.49 | 0.24 ± 0.51 | -0.08 ± 0.54 |
| **Phenylalanine** | 0.247 | 0.000 | 0.037 | 0.902 | 0.410 | 0.004 | 0.108 | 1.000 | 0.344 | 0.000 | 0.038 | 0.840 | 0.05 ± 0.4 | 0.55 ± 0.34 | -0.39 ± 0.35 | -0.34 ± 0.46 |
| **Proline** | 0.203 | 0.018 | 0.166 | 1.000 | 0.367 | 0.099 | 0.340 | 0.998 | 0.277 | 0.022 | 0.174 | 0.999 | 0.03 ± 0.27 | -0.3 ± 0.36 | -0.16 ± 0.19 | -0.13 ± 0.27 |
| **Serine** | 0.125 | 0.659 | 0.972 | 0.030 | 0.148 | 0.510 | 0.878 | 0.123 | 0.232 | 0.730 | 0.971 | 0.066 | 0.4 ± 0.71 | -0.34 ± 0.46 | 0.01 ± 0.54 | 0.41 ± 0.63 |
| **SM 32:1** | 1.000 | 0.998 | 0.486 | 0.511 | 0.719 | 0.845 | 0.944 | 0.982 | 0.992 | 0.988 | 0.508 | 0.284 | -0.17 ± 0.58 | -0.2 ± 0.49 | -0.28 ± 0.46 | -0.44 ± 0.58 |
| **SM 32:2** | 0.702 | 0.997 | 0.989 | 0.408 | 1.000 | 0.906 | 0.999 | 0.998 | 0.458 | 0.987 | 0.991 | 0.227 | -0.29 ± 0.53 | -0.19 ± 0.45 | -0.12 ± 0.51 | -0.41 ± 0.58 |
| **SM 33:1** | 0.054 | 0.450 | 1.000 | 0.047 | 0.066 | 0.994 | 0.982 | 0.120 | 0.157 | 0.387 | 1.000 | 0.129 | 0.29 ± 0.36 | 0 ± 0.55 | -0.14 ± 0.42 | 0.14 ± 0.51 |
| **SM 34:1** | 0.168 | 0.302 | 0.789 | 0.009 | 0.138 | 0.978 | 0.558 | 0.056 | 0.352 | 0.247 | 0.778 | 0.031 | 0.3 ± 0.7 | 0.04 ± 0.88 | 0 ± 0.62 | 0.3 ± 0.8 |
| **SM 34:2** | 0.026 | 0.996 | 0.955 | 0.140 | 0.007 | 0.791 | 1.000 | 0.042 | 0.102 | 0.983 | 0.963 | 0.342 | 0.28 ± 0.49 | -0.16 ± 0.45 | -0.19 ± 0.43 | 0.1 ± 0.52 |
| **SM 35:2** | 0.003 | 1.000 | 0.972 | 0.000 | 0.008 | 0.932 | 0.801 | 0.010 | 0.006 | 1.000 | 0.972 | 0.001 | 0.26 ± 0.34 | -0.1 ± 0.35 | 0.01 ± 0.34 | 0.27 ± 0.39 |
| **SM 36:2** | 0.000 | 0.692 | 1.000 | 0.000 | 0.000 | 0.996 | 0.946 | 0.002 | 0.001 | 0.599 | 1.000 | 0.001 | 0.65 ± 0.71 | 0.02 ± 0.57 | -0.17 ± 0.6 | 0.48 ± 0.67 |
| **Taurine** | 1.000 | 0.154 | 0.078 | 0.059 | 0.917 | 0.881 | 0.047 | 0.127 | 0.990 | 0.093 | 0.067 | 0.185 | -0.01 ± 0.43 | 0.45 ± 0.98 | 0.34 ± 0.47 | 0.33 ± 0.58 |
| **Transcinnamic acid** | 0.082 | 0.000 | 0.010 | 0.926 | 0.255 | 0.004 | 0.036 | 1.000 | 0.140 | 0.000 | 0.010 | 0.863 | 0.08 ± 0.42 | 0.51 ± 0.28 | -0.37 ± 0.3 | -0.29 ± 0.39 |
| **Tryptophan** | 0.738 | 0.228 | 0.140 | 0.766 | 0.724 | 0.785 | 0.318 | 0.999 | 0.747 | 0.236 | 0.143 | 0.781 | 0.06 ± 0.47 | 0.04 ± 0.44 | -0.35 ± 0.49 | -0.3 ± 0.56 |
| **Tyrosine** | 0.730 | 0.123 | 0.306 | 0.949 | 0.717 | 0.674 | 0.546 | 1.000 | 0.791 | 0.120 | 0.314 | 0.933 | -0.02 ± 0.44 | 0.12 ± 0.33 | -0.3 ± 0.32 | -0.32 ± 0.47 |
| **Uric acid** | 0.104 | 0.491 | 0.494 | 0.895 | 0.647 | 0.943 | 0.437 | 1.000 | 0.148 | 0.526 | 0.509 | 0.931 | 0.39 ± 0.57 | -0.44 ± 0.59 | -0.49 ± 0.63 | -0.09 ± 0.76 |
| **Valine** | 0.610 | 0.944 | 0.003 | 0.141 | 0.370 | 0.660 | 0.039 | 0.997 | 0.537 | 0.929 | 0.003 | 0.222 | -0.13 ± 0.3 | 0.01 ± 0.29 | 0.28 ± 0.48 | 0.14 ± 0.34 |

Model 1, fitted models were adjusted for age; Model 2, models were adjusted for age and weight loss; Model 3, models were adjusted for age and levels of fasting insulin. VLCD, very low-calorie diet; RYGB (1d), immediate effect of gastric bypass surgery; RYGB (6w), 6-week effect of gastric bypass surgery; Cum. Effect, cumulative effect of the intervention.

**Table 6B.** Linear-mixed-effect models fitted to lipidomics data between study occasions (fasting plasma samples).

|  | **Model 1**  **(adjusted for age)** | | | | **Model 2**  **(adj. for age and weight loss)** | | | | **Model 3**  **(adj. for age and insulin)** | | | | **Direction (Mean, SD)** | | | |
| --- | --- | --- | --- | --- | --- | --- | --- | --- | --- | --- | --- | --- | --- | --- | --- | --- |
|  | **Effect of VLCD** | **RYGB (1d)** | **RYGB (6w)** | **Cum. effect** | **Effect of VLCD** | **RYGB (1d)** | **RYGB (6w)** | **Cum. effect** | **Effect of VLCD** | **RYGB (1d)** | **RYGB (6w)** | **Cum. effect** | **Effect of VLCD** | **RYGB (1d)** | **RYGB (6w)** | **Cum. effect** |
| **CE16.0*** | 0.999 | 0.859 | 0.965 | 0.893 | 0.976 | 0.803 | 0.916 | 0.862 | 0.999 | 0.857 | 0.966 | 0.889 | 0.71 ± 3.14 | 0.3 ± 1.38 | 0.32 ± 3.07 | 1.19 ± 4.35 |
| **CE18.1*** | 0.983 | 1.000 | 0.896 | 0.608 | 0.895 | 0.994 | 0.784 | 0.640 | 1.000 | 0.997 | 0.890 | 0.859 | 1.09 ± 3.99 | -0.05 ± 0.4 | 1 ± 3.95 | 2 ± 5.23 |
| **CE18.2*** | 0.715 | 0.532 | 0.831 | 0.999 | 0.482 | 0.360 | 0.986 | 0.853 | 0.722 | 0.536 | 0.833 | 0.999 | 1.02 ± 4.16 | -0.43 ± 1.12 | 0.78 ± 4.3 | 1.71 ± 5.51 |
| **CE18.3*** | 0.001 | 0.930 | 0.794 | 0.022 | 0.001 | 0.492 | 0.993 | 0.027 | 0.001 | 0.919 | 0.792 | 0.019 | -0.3 ± 3.81 | 0.5 ± 1.47 | 0.62 ± 3.02 | 0.35 ± 4.57 |
| **CE20.4*** | 0.059 | 0.945 | 1.000 | 0.061 | 0.195 | 0.928 | 1.000 | 0.362 | 0.152 | 0.977 | 1.000 | 0.144 | 1.25 ± 2.81 | 0.03 ± 0.98 | 0.55 ± 3.27 | 1.81 ± 4.24 |
| **LPC16.0*** | 0.109 | 0.186 | 0.388 | 0.953 | 0.263 | 0.354 | 0.592 | 0.947 | 0.080 | 0.165 | 0.381 | 0.908 | 1.34 ± 5.02 | -0.27 ± 0.59 | 0.92 ± 5.11 | 2.17 ± 6.83 |
| **LPC16.1*** | 0.982 | 0.320 | 0.488 | 0.807 | 0.903 | 0.363 | 0.761 | 1.000 | 0.970 | 0.308 | 0.488 | 0.861 | 0.65 ± 3.74 | -0.53 ± 1.08 | 0.43 ± 3.63 | 0.88 ± 4.62 |
| **LPC18.0*** | 1.000 | 0.014 | 0.875 | 0.904 | 0.991 | 0.073 | 0.969 | 1.000 | 1.000 | 0.014 | 0.872 | 0.942 | 0.85 ± 4.87 | -0.79 ± 1.03 | 0.91 ± 4.79 | 1.62 ± 6.34 |
| **LPC18.1*** | 0.936 | 0.420 | 0.995 | 0.775 | 0.979 | 0.726 | 0.996 | 0.963 | 0.967 | 0.462 | 0.995 | 0.843 | 1 ± 4.59 | -0.26 ± 0.75 | 1.11 ± 4.48 | 1.99 ± 6.02 |
| **LPC18.2*** | 0.985 | 0.439 | 0.853 | 0.988 | 0.903 | 0.442 | 0.974 | 0.997 | 0.985 | 0.446 | 0.855 | 0.990 | 0.85 ± 4.65 | -0.41 ± 0.96 | 0.77 ± 4.61 | 1.51 ± 6.18 |
| **LPC20.3*** | 0.932 | 0.884 | 0.925 | 0.510 | 0.968 | 0.983 | 1.000 | 0.988 | 0.915 | 0.877 | 0.929 | 0.492 | 0.18 ± 3.79 | 0.08 ± 1.27 | 0.64 ± 3.61 | 0.73 ± 4.92 |
| **LPC20.4*** | 0.000 | 0.986 | 0.948 | 0.004 | 0.009 | 0.965 | 0.986 | 0.118 | 0.000 | 0.983 | 0.947 | 0.004 | 2.08 ± 3.96 | -0.11 ± 1.45 | 0.42 ± 4.34 | 2.5 ± 5.83 |
| **LPC22.6*** | 0.102 | 0.983 | 0.994 | 0.231 | 0.163 | 0.887 | 1.000 | 0.388 | 0.186 | 0.992 | 0.995 | 0.351 | 1.11 ± 3.02 | -0.1 ± 1.07 | 0.64 ± 3.58 | 1.68 ± 4.62 |
| **PC32.0*** | 0.001 | 0.934 | 1.000 | 0.001 | 0.002 | 0.551 | 0.977 | 0.010 | 0.001 | 0.910 | 1.000 | 0.000 | 1.24 ± 4.1 | 0.01 ± 0.51 | 0.85 ± 4.2 | 2.04 ± 5.7 |
| **PC32.1*** | 0.001 | 1.000 | 0.999 | 0.000 | 0.771 | 0.376 | 0.887 | 0.996 | 0.002 | 1.000 | 0.999 | 0.001 | -0.51 ± 4.72 | -0.09 ± 0.8 | 0.78 ± 3.69 | 0.2 ± 5.42 |
| **PC32.2*** | 0.020 | 0.295 | 0.611 | 0.000 | 0.460 | 0.333 | 0.862 | 0.332 | 0.036 | 0.285 | 0.612 | 0.000 | -1.26 ± 4.85 | -1.88 ± 2.21 | 0.37 ± 3.55 | -1.32 ± 4.04 |
| **PC34.0*** | 1.000 | 0.948 | 0.827 | 0.863 | 0.994 | 0.864 | 0.728 | 0.815 | 1.000 | 0.945 | 0.832 | 0.856 | 0.39 ± 3.83 | -0.25 ± 1.37 | 1.06 ± 3.75 | 1.24 ± 4.89 |
| **PC34.1*** | 0.775 | 0.934 | 0.935 | 0.995 | 0.686 | 1.000 | 0.995 | 0.930 | 0.785 | 0.939 | 0.936 | 0.995 | 1.23 ± 5.1 | 0.13 ± 0.19 | 1.04 ± 5.04 | 2.22 ± 6.91 |
| **PC34.2*** | 0.374 | 0.599 | 0.003 | 0.321 | 0.046 | 0.086 | 0.107 | 0.944 | 0.188 | 0.478 | 0.002 | 0.532 | 1.24 ± 5.21 | -0.05 ± 0.15 | 0.96 ± 5.19 | 2.16 ± 7.11 |
| **PC34.3*** | 0.051 | 0.843 | 0.999 | 0.025 | 0.823 | 0.477 | 0.997 | 0.967 | 0.087 | 0.822 | 0.999 | 0.043 | -0.34 ± 5.13 | -0.32 ± 1.17 | 0.86 ± 4.37 | 0.29 ± 5.9 |
| **PC36.1*** | 0.016 | 0.253 | 0.744 | 0.268 | 0.465 | 0.267 | 0.586 | 0.993 | 0.021 | 0.260 | 0.750 | 0.300 | 0.12 ± 5.24 | -0.46 ± 0.68 | 1.35 ± 4.57 | 1.37 ± 6.41 |
| **PC36.2*** | 0.742 | 0.003 | 1.000 | 0.626 | 1.000 | 0.006 | 0.991 | 0.995 | 0.764 | 0.004 | 1.000 | 0.651 | 0.85 ± 5.31 | -0.54 ± 0.51 | 1.16 ± 5.08 | 1.93 ± 6.95 |
| **PC36.3*** | 0.205 | 0.093 | 0.890 | 0.024 | 0.966 | 0.076 | 0.998 | 0.959 | 0.261 | 0.093 | 0.891 | 0.036 | 0.89 ± 5.24 | -0.26 ± 0.29 | 1.09 ± 4.99 | 1.9 ± 6.82 |
| **PC36.4*** | 0.000 | 0.956 | 0.058 | 0.000 | 0.000 | 0.897 | 0.063 | 0.248 | 0.000 | 0.981 | 0.054 | 0.000 | 1.49 ± 4.95 | 0.05 ± 0.08 | 0.95 ± 5.04 | 2.43 ± 6.85 |
| **PC36.5*** | 0.963 | 0.968 | 0.999 | 0.886 | 0.995 | 0.693 | 0.998 | 0.989 | 0.994 | 0.948 | 0.999 | 0.960 | 0.71 ± 5.04 | -0.08 ± 0.49 | 0.79 ± 4.59 | 1.45 ± 6.44 |
| **PC38.3*** | 0.005 | 0.127 | 1.000 | 0.003 | 0.611 | 0.048 | 0.978 | 0.933 | 0.010 | 0.122 | 1.000 | 0.006 | 0.26 ± 5.16 | -0.51 ± 0.54 | 1.06 ± 4.68 | 1.21 ± 6.42 |
| **PC38.4*** | 0.015 | 0.679 | 0.942 | 0.108 | 0.186 | 0.889 | 0.959 | 0.663 | 0.004 | 0.561 | 0.929 | 0.042 | 1.29 ± 4.7 | -0.14 ± 0.14 | 0.93 ± 4.67 | 2.21 ± 6.32 |
| **PC38.5*** | 0.734 | 0.806 | 0.993 | 0.927 | 1.000 | 0.470 | 0.878 | 0.976 | 0.854 | 0.770 | 0.994 | 0.973 | 0.46 ± 4.62 | -0.21 ± 0.24 | 0.99 ± 4.16 | 1.37 ± 5.74 |
| **PC38.6*** | 0.000 | 0.701 | 0.682 | 0.000 | 0.000 | 0.465 | 0.947 | 0.004 | 0.000 | 0.666 | 0.677 | 0.000 | 1.68 ± 4.84 | -0.08 ± 0.3 | 0.97 ± 5.07 | 2.58 ± 6.75 |
| **PC40.4*** | 0.634 | 0.613 | 0.998 | 0.450 | 0.883 | 0.834 | 0.999 | 0.904 | 0.716 | 0.598 | 0.998 | 0.531 | 0.35 ± 4.18 | -0.5 ± 1.13 | 0.67 ± 3.94 | 0.74 ± 5.27 |
| **PC40.5*** | 0.215 | 1.000 | 0.751 | 0.870 | 0.785 | 0.994 | 0.684 | 1.000 | 0.272 | 1.000 | 0.760 | 0.905 | 0.15 ± 3.89 | -0.01 ± 0.94 | 0.96 ± 3.45 | 0.9 ± 4.82 |
| **PC40.6*** | 0.019 | 0.118 | 0.993 | 0.058 | 0.021 | 0.076 | 1.000 | 0.088 | 0.013 | 0.101 | 0.992 | 0.041 | 1.34 ± 4.55 | -0.3 ± 0.46 | 0.84 ± 4.62 | 2.08 ± 6.11 |
| **SM32.1*** | 0.957 | 0.280 | 0.170 | 0.511 | 0.402 | 0.068 | 0.677 | 0.974 | 0.963 | 0.291 | 0.176 | 0.529 | 0.95 ± 4.51 | -0.41 ± 0.87 | 0.41 ± 4.6 | 1.25 ± 6.15 |
| **SM32.2*** | 0.969 | 0.823 | 0.666 | 0.297 | 0.911 | 0.263 | 0.992 | 0.994 | 0.941 | 0.851 | 0.673 | 0.255 | 0.37 ± 3.57 | -0.13 ± 0.92 | 0.44 ± 3.32 | 0.7 ± 4.51 |
| **SM33.1*** | 0.008 | 0.354 | 0.282 | 0.594 | 0.007 | 0.132 | 0.768 | 0.249 | 0.014 | 0.383 | 0.295 | 0.658 | 1.38 ± 3.88 | -0.25 ± 0.68 | 0.58 ± 4.27 | 1.87 ± 5.6 |
| **SM34.1*** | 0.186 | 0.588 | 0.926 | 0.027 | 0.074 | 0.223 | 0.611 | 0.037 | 0.327 | 0.664 | 0.925 | 0.065 | 1.25 ± 4.93 | -0.11 ± 0.31 | 1.17 ± 4.9 | 2.35 ± 6.67 |
| **SM34.2*** | 0.018 | 0.699 | 0.685 | 0.336 | 0.004 | 0.152 | 0.997 | 0.068 | 0.023 | 0.709 | 0.691 | 0.364 | 1.52 ± 4.57 | -0.18 ± 0.7 | 0.67 ± 4.8 | 2.09 ± 6.36 |
| **SM35.1*** | 0.007 | 0.949 | 1.000 | 0.003 | 0.368 | 1.000 | 0.999 | 0.684 | 0.012 | 0.961 | 1.000 | 0.007 | 2.15 ± 2.94 | -0.26 ± 1.78 | 0.31 ± 3.56 | 2.51 ± 4.48 |
| **SM36.0*** | 0.000 | 0.952 | 0.001 | 0.000 | 0.000 | 0.599 | 0.024 | 0.001 | 0.000 | 0.938 | 0.001 | 0.000 | 3.1 ± 2.76 | -0.11 ± 0.67 | -0.63 ± 4.1 | 2.51 ± 4.96 |
| **SM36.1*** | 0.000 | 0.995 | 0.981 | 0.000 | 0.000 | 0.778 | 0.996 | 0.001 | 0.000 | 0.994 | 0.982 | 0.000 | 1.7 ± 3.94 | 0.08 ± 0.33 | 0.76 ± 4.26 | 2.41 ± 5.67 |
| **SM36.2*** | 0.002 | 0.999 | 1.000 | 0.004 | 0.000 | 0.286 | 0.882 | 0.001 | 0.009 | 1.000 | 1.000 | 0.015 | 1.4 ± 3.81 | -0.02 ± 0.24 | 0.87 ± 3.93 | 2.19 ± 5.25 |
| **SM38.1*** | 1.000 | 0.915 | 0.762 | 0.764 | 0.751 | 0.393 | 0.997 | 0.947 | 1.000 | 0.910 | 0.764 | 0.814 | 0.84 ± 4.4 | -0.13 ± 0.46 | 0.7 ± 4.29 | 1.49 ± 5.93 |
| **SM38.2*** | 0.079 | 0.489 | 1.000 | 0.082 | 0.008 | 0.059 | 0.858 | 0.014 | 0.075 | 0.475 | 1.000 | 0.078 | 1.17 ± 3.71 | -0.18 ± 0.51 | 0.79 ± 3.67 | 1.87 ± 4.88 |
| **SM39.1*** | 0.998 | 0.406 | 0.121 | 0.058 | 0.763 | 0.076 | 0.632 | 1.000 | 0.999 | 0.407 | 0.125 | 0.075 | 0.56 ± 4.27 | -0.5 ± 0.99 | 0.13 ± 4.26 | 0.64 ± 5.79 |
| **SM40.0*** | 1.000 | 0.822 | 0.969 | 0.985 | 0.999 | 0.885 | 0.990 | 1.000 | 0.997 | 0.777 | 0.966 | 0.998 | 0.57 ± 4.24 | -0.14 ± 1.69 | -0.06 ± 3.37 | 0.23 ± 4.68 |
| **SM40.1*** | 0.700 | 0.569 | 0.266 | 0.012 | 1.000 | 0.211 | 0.763 | 0.982 | 0.755 | 0.565 | 0.271 | 0.018 | 0.81 ± 4.87 | -0.17 ± 0.42 | 0.74 ± 4.66 | 1.5 ± 6.45 |
| **SM40.2*** | 1.000 | 0.926 | 0.967 | 0.986 | 0.257 | 0.098 | 0.974 | 0.290 | 1.000 | 0.934 | 0.969 | 0.982 | 1.13 ± 4.61 | -0.22 ± 0.94 | 0.67 ± 4.7 | 1.76 ± 6.28 |
| **SM41.1*** | 1.000 | 0.412 | 0.014 | 0.012 | 0.755 | 0.122 | 0.175 | 0.992 | 1.000 | 0.415 | 0.015 | 0.018 | 0.85 ± 4.62 | -0.31 ± 0.72 | 0.36 ± 4.6 | 1.15 ± 6.28 |
| **SM41.2*** | 0.650 | 0.475 | 0.730 | 1.000 | 0.191 | 0.128 | 0.996 | 0.548 | 0.742 | 0.512 | 0.739 | 1.000 | 1.14 ± 4.43 | -0.35 ± 0.98 | 0.58 ± 4.58 | 1.63 ± 6.09 |
| **SM42.1*** | 1.000 | 0.491 | 0.205 | 0.268 | 0.799 | 0.222 | 0.650 | 1.000 | 1.000 | 0.499 | 0.211 | 0.301 | 0.95 ± 4.78 | -0.25 ± 0.63 | 0.6 ± 4.71 | 1.5 ± 6.45 |
| **SM42.2*** | 0.001 | 0.691 | 0.987 | 0.003 | 0.002 | 0.378 | 1.000 | 0.026 | 0.001 | 0.710 | 0.987 | 0.005 | 1.46 ± 4.97 | -0.09 ± 0.33 | 1.06 ± 5.02 | 2.45 ± 6.77 |
| **SM42.3*** | 0.000 | 0.990 | 0.978 | 0.000 | 0.000 | 0.822 | 1.000 | 0.003 | 0.000 | 0.995 | 0.981 | 0.000 | 1.98 ± 4.43 | -0.05 ± 0.46 | 0.89 ± 4.78 | 2.79 ± 6.22 |
| **SM43.1*** | 1.000 | 0.838 | 0.238 | 0.188 | 0.964 | 0.587 | 0.586 | 0.995 | 1.000 | 0.843 | 0.243 | 0.204 | 0.54 ± 3.14 | -0.49 ± 1.19 | -0.13 ± 3.16 | 0.56 ± 4.57 |
| **SM43.2*** | 0.009 | 0.656 | 0.998 | 0.023 | 0.001 | 0.083 | 0.950 | 0.005 | 0.015 | 0.679 | 0.998 | 0.033 | 2.14 ± 3.38 | -0.54 ± 1.34 | 0.39 ± 3.76 | 2.42 ± 4.73 |
| **SM44.2*** | 0.852 | 0.997 | 1.000 | 0.830 | 0.975 | 1.000 | 1.000 | 0.991 | 0.849 | 0.997 | 1.000 | 0.827 | 1.12 ± 3.11 | -0.16 ± 1.76 | 0.73 ± 3.47 | 1.44 ± 3.96 |
| **TG48.1*** | 0.000 | 0.294 | 1.000 | 0.000 | 0.006 | 0.323 | 0.998 | 0.082 | 0.000 | 0.289 | 1.000 | 0.000 | -1.2 ± 5.17 | -0.41 ± 0.76 | 0.87 ± 3.49 | -0.38 ± 5.49 |
| **TG48.2*** | 0.004 | 0.065 | 1.000 | 0.004 | 0.541 | 0.039 | 0.966 | 0.922 | 0.010 | 0.064 | 1.000 | 0.010 | -0.59 ± 5.31 | -0.73 ± 0.87 | 0.9 ± 3.8 | 0.16 ± 5.54 |
| **TG50.0*** | 0.041 | 0.999 | 0.652 | 0.000 | 0.246 | 0.999 | 0.696 | 0.133 | 0.074 | 1.000 | 0.659 | 0.001 | -0.78 ± 4.78 | 0.28 ± 0.94 | 0.16 ± 2.95 | -0.43 ± 5.39 |
| **TG50.1*** | 0.775 | 0.995 | 0.161 | 0.008 | 1.000 | 0.751 | 0.553 | 0.923 | 0.929 | 0.986 | 0.159 | 0.026 | 0.77 ± 4.98 | 0.02 ± 0.29 | 0.73 ± 4.63 | 1.45 ± 6.55 |
| **TG50.2*** | 0.740 | 0.505 | 0.727 | 0.113 | 0.991 | 0.122 | 0.997 | 1.000 | 0.846 | 0.482 | 0.728 | 0.183 | 0.76 ± 5.15 | -0.17 ± 0.34 | 0.91 ± 4.69 | 1.58 ± 6.56 |
| **TG50.3*** | 0.863 | 0.242 | 0.702 | 0.174 | 0.971 | 0.054 | 0.995 | 0.999 | 0.943 | 0.224 | 0.702 | 0.277 | 0.59 ± 5.07 | -0.34 ± 0.62 | 0.83 ± 4.49 | 1.3 ± 6.22 |
| **TG50.4*** | 0.306 | 0.035 | 0.696 | 0.015 | 0.991 | 0.032 | 0.971 | 0.948 | 0.467 | 0.032 | 0.697 | 0.037 | -0.55 ± 5.32 | -1.48 ± 1.89 | 0.5 ± 4.17 | -0.41 ± 5.17 |
| **TG52.1*** | 0.360 | 0.986 | 1.000 | 0.342 | 0.599 | 1.000 | 1.000 | 0.740 | 0.527 | 0.976 | 1.000 | 0.494 | 0.42 ± 5.08 | 0 ± 0.67 | 0.66 ± 4.18 | 1.03 ± 6.22 |
| **TG52.2*** | 0.003 | 0.695 | 0.641 | 0.146 | 0.019 | 0.565 | 0.899 | 0.295 | 0.004 | 0.687 | 0.645 | 0.146 | 1.41 ± 5.2 | -0.06 ± 0.2 | 1.06 ± 5.16 | 2.42 ± 7.03 |
| **TG52.3*** | 0.002 | 0.501 | 0.208 | 0.477 | 0.006 | 0.267 | 0.605 | 0.305 | 0.002 | 0.477 | 0.211 | 0.422 | 1.43 ± 5.16 | -0.1 ± 0.28 | 1 ± 5.18 | 2.38 ± 7.03 |
| **TG52.4*** | 0.754 | 0.276 | 0.251 | 0.902 | 0.420 | 0.158 | 0.661 | 0.980 | 0.600 | 0.235 | 0.248 | 0.975 | 1.13 ± 5.15 | -0.25 ± 0.56 | 0.86 ± 5.01 | 1.89 ± 6.82 |
| **TG52.5*** | 0.538 | 0.243 | 0.770 | 0.066 | 0.996 | 0.202 | 0.971 | 0.964 | 0.778 | 0.192 | 0.756 | 0.157 | 0.41 ± 5.06 | -0.45 ± 0.81 | 0.84 ± 4.47 | 1.07 ± 6.08 |
| **TG54.3*** | 0.013 | 0.820 | 0.915 | 0.001 | 0.627 | 1.000 | 1.000 | 0.735 | 0.023 | 0.845 | 0.913 | 0.001 | 1.41 ± 4.8 | -0.1 ± 0.24 | 1.09 ± 4.61 | 2.4 ± 6.25 |
| **TG54.4*** | 0.011 | 0.720 | 0.911 | 0.107 | 0.293 | 0.985 | 0.854 | 0.869 | 0.015 | 0.727 | 0.912 | 0.122 | 1.39 ± 4.85 | -0.13 ± 0.38 | 0.96 ± 4.69 | 2.25 ± 6.38 |
| **TG54.5*** | 0.398 | 0.750 | 0.949 | 0.823 | 0.349 | 0.590 | 0.999 | 0.687 | 0.270 | 0.689 | 0.944 | 0.687 | 1.24 ± 5.03 | -0.22 ± 0.76 | 0.8 ± 4.82 | 1.92 ± 6.6 |
| **TG54.6*** | 0.897 | 0.696 | 0.834 | 1.000 | 0.592 | 0.420 | 0.991 | 0.900 | 0.671 | 0.576 | 0.807 | 0.999 | 0.87 ± 5.03 | -0.36 ± 0.8 | 0.69 ± 4.8 | 1.43 ± 6.4 |
| **TG56.6*** | 0.000 | 0.999 | 0.951 | 0.005 | 0.012 | 0.979 | 0.993 | 0.138 | 0.000 | 0.998 | 0.950 | 0.005 | 1.64 ± 4.5 | -0.02 ± 0.52 | 0.77 ± 4.57 | 2.3 ± 6.13 |

Model 1, fitted models were adjusted for age; Model 2, models were adjusted for age and weight loss; Model 3, models were adjusted for age and levels of fasting insulin. VLCD, very low-calorie diet; RYGB (1d), immediate effect of gastric bypass surgery; RYGB (6w), 6-week effect of gastric bypass surgery; Cum. Effect, cumulative effect of the intervention.

**Table 7A.** Assessment of difference in metabolomics data between normoglycaemic and T2D patients (fasting plasma samples).

|  | **Occasion:**  **Baseline** | | **Occasion:**  **Diet** | | **Occasion:**  **Surgery** | | **Occasion:**  **Recovery** | | **Effect of VLCD** | | **RYGB (1d)** | | **RYGB (6w)** | | **Cum. effect** | |
| --- | --- | --- | --- | --- | --- | --- | --- | --- | --- | --- | --- | --- | --- | --- | --- | --- |
|  | *P a* | *P b* | *P a* | *P b* | *P a* | *P b* | *P a* | *P b* | *P a* | *P b* | *P a* | *P b* | *P a* | *P b* | *P a* | *P b* |
| **1-Methyl-adenosine** | 0.7486 | 0.8110 | 0.5594 | 0.8853 | 0.0698 | 0.4405 | 0.2190 | 0.7918 | 0.3900 | 0.5557 | 0.1906 | 0.7259 | 0.6220 | 0.9770 | 0.1390 | 0.2891 |
| **1-Methylhistidine** | 0.5655 | 0.6673 | 0.3207 | 0.7678 | 0.7052 | 0.8492 | 0.5305 | 0.9309 | 0.4818 | 0.6263 | 0.2416 | 0.7259 | 0.2576 | 0.9770 | 0.3153 | 0.4431 |
| **2-Hydroxycinnamic acid** | 0.0457 | 0.2617 | 0.7964 | 0.9622 | 0.1096 | 0.4515 | 0.3893 | 0.7918 | 0.1146 | 0.3971 | 0.0773 | 0.7259 | 0.3445 | 0.9770 | 0.0154 | 0.0890 |
| **3-Hydroxybutyrate** | 0.0814 | 0.2867 | 0.6312 | 0.9513 | 0.5775 | 0.7722 | 0.6268 | 0.9822 | 0.2501 | 0.4920 | 0.4030 | 0.7259 | 0.9993 | 0.9993 | 0.3139 | 0.4431 |
| **5-Oxoproline** | 0.7039 | 0.7803 | 0.4697 | 0.8279 | 0.3977 | 0.6267 | 0.6875 | 0.9822 | 0.6449 | 0.7621 | 0.3704 | 0.7259 | 0.6490 | 0.9770 | 0.9524 | 0.9710 |
| **Acetylalanine** | 0.7052 | 0.7803 | 0.9725 | 0.9918 | 0.6891 | 0.8432 | 0.9520 | 0.9948 | 0.7820 | 0.8447 | 0.7696 | 0.9136 | 0.9394 | 0.9770 | 0.7084 | 0.7596 |
| **Alanine** | 0.2085 | 0.4577 | 0.3400 | 0.7678 | 0.9544 | 0.9828 | 0.9492 | 0.9948 | 0.6053 | 0.7280 | 0.3944 | 0.7259 | 0.3957 | 0.9770 | 0.2084 | 0.3674 |
| **Arginine** | 0.8926 | 0.9284 | 0.2398 | 0.7678 | 0.4948 | 0.7147 | 0.2299 | 0.7918 | 0.2774 | 0.4920 | 0.1649 | 0.7259 | 0.4585 | 0.9770 | 0.4218 | 0.5314 |
| **Asparagine** | 0.5505 | 0.6581 | 0.3045 | 0.7678 | 0.6669 | 0.8356 | 0.9089 | 0.9948 | 0.4035 | 0.5596 | 0.2676 | 0.7259 | 0.3330 | 0.9770 | 0.5676 | 0.6347 |
| **Aspartic acid** | 0.0873 | 0.2929 | 0.2611 | 0.7678 | 0.8136 | 0.8907 | 0.8790 | 0.9948 | 0.7246 | 0.8103 | 0.3042 | 0.7259 | 0.3546 | 0.9770 | 0.1555 | 0.2993 |
| **Caffeine** | 0.3022 | 0.5119 | 0.9918 | 0.9918 | 0.0545 | 0.4405 | 0.9233 | 0.9948 | 0.5016 | 0.6361 | 0.1050 | 0.7259 | 0.9320 | 0.9770 | 0.5354 | 0.6187 |
| **Carnitine** | 0.2122 | 0.4577 | 0.2667 | 0.7678 | 0.2189 | 0.5276 | 0.0135 | 0.7551 | 0.9560 | 0.9653 | 0.9187 | 0.9651 | 0.1255 | 0.9770 | 0.2506 | 0.4049 |
| **Carnitine C10:0** | 0.5711 | 0.6673 | 0.0555 | 0.7678 | 0.0324 | 0.4405 | 0.1176 | 0.7918 | 0.1245 | 0.3971 | 0.8587 | 0.9305 | 0.8614 | 0.9770 | 0.0990 | 0.2336 |
| **Carnitine C10:1** | 0.3937 | 0.5459 | 0.0525 | 0.7678 | 0.0569 | 0.4405 | 0.2532 | 0.7918 | 0.0628 | 0.3482 | 0.7866 | 0.9136 | 0.7056 | 0.9770 | 0.1081 | 0.2404 |
| **Carnitine C10:2** | 0.4923 | 0.6235 | 0.1743 | 0.7678 | 0.2181 | 0.5276 | 0.2486 | 0.7918 | 0.0620 | 0.3482 | 0.8015 | 0.9160 | 0.7742 | 0.9770 | 0.1117 | 0.2420 |
| **Carnitine C12:0** | 0.3593 | 0.5189 | 0.2742 | 0.7678 | 0.0999 | 0.4515 | 0.1439 | 0.7918 | 0.1113 | 0.3971 | 0.6645 | 0.9102 | 0.4515 | 0.9770 | 0.0323 | 0.1345 |
| **Carnitine C12:1** | 0.3695 | 0.5194 | 0.1237 | 0.7678 | 0.2661 | 0.5276 | 0.2573 | 0.7918 | 0.0674 | 0.3482 | 0.7906 | 0.9136 | 0.8956 | 0.9770 | 0.0872 | 0.2313 |
| **Carnitine C14:0** | 0.1110 | 0.3298 | 0.6905 | 0.9622 | 0.2493 | 0.5276 | 0.2939 | 0.7918 | 0.0365 | 0.3482 | 0.5211 | 0.8088 | 0.4139 | 0.9770 | 0.0142 | 0.0875 |
| **Carnitine C14:1** | 0.3642 | 0.5189 | 0.3807 | 0.7918 | 0.4942 | 0.7147 | 0.1603 | 0.7918 | 0.1271 | 0.3971 | 0.9408 | 0.9735 | 0.4870 | 0.9770 | 0.0509 | 0.1721 |
| **Carnitine C14:2** | 0.3361 | 0.5189 | 0.2659 | 0.7678 | 0.5194 | 0.7300 | 0.3843 | 0.7918 | 0.0933 | 0.3971 | 0.7885 | 0.9136 | 0.8854 | 0.9770 | 0.0991 | 0.2336 |
| **Carnitine C16:0** | 0.0201 | 0.2093 | 0.4675 | 0.8279 | 0.1520 | 0.4515 | 0.2177 | 0.7918 | 0.0132 | 0.3482 | 0.4227 | 0.7327 | 0.4728 | 0.9770 | 0.0031 | 0.0704 |
| **Carnitine C18:0** | 0.0579 | 0.2617 | 0.9581 | 0.9918 | 0.7189 | 0.8492 | 0.9692 | 0.9948 | 0.1439 | 0.3971 | 0.6067 | 0.8630 | 0.9914 | 0.9993 | 0.0556 | 0.1753 |
| **Carnitine C18:1** | 0.0350 | 0.2277 | 0.4135 | 0.7964 | 0.2740 | 0.5276 | 0.1060 | 0.7918 | 0.0200 | 0.3482 | 0.6140 | 0.8630 | 0.4300 | 0.9770 | 0.0034 | 0.0704 |
| **Carnitine C18:2** | 0.0038 | 0.1318 | 0.7412 | 0.9622 | 0.5179 | 0.7300 | 0.6074 | 0.9822 | 0.0197 | 0.3482 | 0.7642 | 0.9136 | 0.8675 | 0.9770 | 0.0057 | 0.0792 |
| **Carnitine C2:0** | 0.4752 | 0.6102 | 0.4960 | 0.8598 | 0.8863 | 0.9406 | 0.1920 | 0.7918 | 0.8895 | 0.9199 | 0.7173 | 0.9136 | 0.5370 | 0.9770 | 0.7062 | 0.7596 |
| **Carnitine C3:0** | 0.0132 | 0.2093 | 0.8794 | 0.9918 | 0.2830 | 0.5312 | 0.0368 | 0.7918 | 0.1896 | 0.4286 | 0.4979 | 0.7947 | 0.0208 | 0.9770 | 0.8070 | 0.8518 |
| **Carnitine C4:0** | 0.0663 | 0.2653 | 0.2672 | 0.7678 | 0.9987 | 0.9987 | 0.2154 | 0.7918 | 0.4158 | 0.5690 | 0.2513 | 0.7259 | 0.8489 | 0.9770 | 0.4231 | 0.5314 |
| **Carnitine C5:0** | 0.4282 | 0.5709 | 0.9432 | 0.9918 | 0.7801 | 0.8723 | 0.9099 | 0.9948 | 0.6090 | 0.7280 | 0.8340 | 0.9305 | 0.9715 | 0.9905 | 0.5541 | 0.6333 |
| **Carnitine C6:0** | 0.3509 | 0.5189 | 0.0749 | 0.7678 | 0.2446 | 0.5276 | 0.3502 | 0.7918 | 0.0363 | 0.3482 | 0.7726 | 0.9136 | 0.5627 | 0.9770 | 0.0781 | 0.2137 |
| **Carnitine C8:0** | 0.5981 | 0.6761 | 0.0873 | 0.7678 | 0.0767 | 0.4405 | 0.1995 | 0.7918 | 0.1419 | 0.3971 | 0.9553 | 0.9741 | 0.9273 | 0.9770 | 0.1423 | 0.2901 |
| **Carnitine C8:1** | 0.0633 | 0.2635 | 0.8142 | 0.9622 | 0.9754 | 0.9946 | 0.5383 | 0.9309 | 0.1722 | 0.4286 | 0.8589 | 0.9305 | 0.3864 | 0.9770 | 0.0113 | 0.0870 |
| **Citric acid** | 0.9748 | 0.9922 | 0.3617 | 0.7678 | 0.0805 | 0.4405 | 0.0710 | 0.7918 | 0.4295 | 0.5802 | 0.4732 | 0.7906 | 0.4061 | 0.9770 | 0.1687 | 0.3133 |
| **Creatine** | 0.1031 | 0.3298 | 0.1598 | 0.7678 | 0.2462 | 0.5276 | 0.0145 | 0.7551 | 0.3792 | 0.5557 | 0.4561 | 0.7776 | 0.6799 | 0.9770 | 0.2187 | 0.3750 |
| **Cystine** | 0.4708 | 0.6102 | 0.5618 | 0.8853 | 0.1149 | 0.4515 | 0.5337 | 0.9309 | 0.4006 | 0.5596 | 0.3440 | 0.7259 | 0.7263 | 0.9770 | 0.3091 | 0.4431 |
| **Dihydroorotic acid** | 0.1398 | 0.3817 | 0.3163 | 0.7678 | 0.9093 | 0.9496 | 0.5007 | 0.9309 | 0.8473 | 0.8901 | 0.2984 | 0.7259 | 0.2152 | 0.9770 | 0.0514 | 0.1721 |
| **Gluconic acid** | 0.5039 | 0.6235 | 0.9268 | 0.9918 | 0.1823 | 0.4921 | 0.3594 | 0.7918 | 0.5275 | 0.6610 | 0.3562 | 0.7259 | 0.5483 | 0.9770 | 0.9217 | 0.9491 |
| **Glucosamine-6-phosphate** | 0.3058 | 0.5119 | 0.1281 | 0.7678 | 0.3065 | 0.5312 | 0.2945 | 0.7918 | 0.1874 | 0.4286 | 0.1109 | 0.7259 | 0.0899 | 0.9770 | 0.0383 | 0.1475 |
| **Glutamic acid** | 0.2253 | 0.4595 | 0.3133 | 0.7678 | 0.6777 | 0.8391 | 0.9923 | 0.9948 | 0.6819 | 0.7880 | 0.5476 | 0.8175 | 0.2805 | 0.9770 | 0.2857 | 0.4331 |
| **Glutamine** | 0.5793 | 0.6678 | 0.3144 | 0.7678 | 0.2694 | 0.5276 | 0.9178 | 0.9948 | 0.3586 | 0.5452 | 0.2448 | 0.7259 | 0.3075 | 0.9770 | 0.4343 | 0.5314 |
| **Glyceric acid** | 0.5843 | 0.6678 | 0.6858 | 0.9622 | 0.5374 | 0.7452 | 0.3815 | 0.7918 | 0.8934 | 0.9199 | 0.9454 | 0.9735 | 0.2487 | 0.9770 | 0.4023 | 0.5314 |
| **Hippuric acid** | 0.1667 | 0.3939 | 0.1876 | 0.7678 | 0.1514 | 0.4515 | 0.6853 | 0.9822 | 0.0684 | 0.3482 | 0.7816 | 0.9136 | 0.1105 | 0.9770 | 0.4069 | 0.5314 |
| **Histidine** | 0.4983 | 0.6235 | 0.2180 | 0.7678 | 0.8297 | 0.8989 | 0.3502 | 0.7918 | 0.2791 | 0.4920 | 0.2008 | 0.7259 | 0.3157 | 0.9770 | 0.8108 | 0.8518 |
| **Hydroxyproline** | 0.5096 | 0.6235 | 0.5604 | 0.8853 | 0.9986 | 0.9987 | 0.9726 | 0.9948 | 0.9894 | 0.9894 | 0.5043 | 0.7947 | 0.6239 | 0.9770 | 0.5755 | 0.6368 |
| **Hypoxanthine** | 0.4123 | 0.5620 | 0.2635 | 0.7678 | 0.2608 | 0.5276 | 0.9331 | 0.9948 | 0.7456 | 0.8249 | 0.8792 | 0.9427 | 0.4156 | 0.9770 | 0.6479 | 0.7093 |
| **Indole** | 0.0625 | 0.2635 | 0.7506 | 0.9622 | 0.0220 | 0.4405 | 0.9947 | 0.9948 | 0.2894 | 0.4935 | 0.0223 | 0.7259 | 0.8538 | 0.9770 | 0.2873 | 0.4331 |
| **Kynurenine** | 0.3301 | 0.5189 | 0.2358 | 0.7678 | 0.0181 | 0.4405 | 0.3659 | 0.7918 | 0.7878 | 0.8447 | 0.1203 | 0.7259 | 0.7579 | 0.9770 | 0.9966 | 0.9966 |
| **Lactic acid** | 0.0330 | 0.2277 | 0.4249 | 0.8035 | 0.6508 | 0.8254 | 0.6591 | 0.9822 | 0.2331 | 0.4848 | 0.7436 | 0.9136 | 0.7210 | 0.9770 | 0.1087 | 0.2404 |
| **Leucine-Isoleucine** | 0.0377 | 0.2305 | 0.3226 | 0.7678 | 0.4251 | 0.6502 | 0.6162 | 0.9822 | 0.0268 | 0.3482 | 0.8906 | 0.9451 | 0.6685 | 0.9770 | 0.0654 | 0.1999 |
| **LPC 14:0** | 0.2448 | 0.4714 | 0.3256 | 0.7678 | 0.0255 | 0.4405 | 0.8539 | 0.9948 | 0.1389 | 0.3971 | 0.1133 | 0.7259 | 0.6500 | 0.9770 | 0.2199 | 0.3750 |
| **LPC 15:0** | 0.3496 | 0.5189 | 0.3485 | 0.7678 | 0.0511 | 0.4405 | 0.9948 | 0.9948 | 0.2723 | 0.4920 | 0.2257 | 0.7259 | 0.6486 | 0.9770 | 0.4969 | 0.6006 |
| **LPC 16:0** | 0.0559 | 0.2617 | 0.3977 | 0.7943 | 0.1266 | 0.4515 | 0.9898 | 0.9948 | 0.0694 | 0.3482 | 0.3633 | 0.7259 | 0.7419 | 0.9770 | 0.1011 | 0.2336 |
| **LPC 16:1** | 0.4377 | 0.5762 | 0.1259 | 0.7678 | 0.0465 | 0.4405 | 0.5229 | 0.9309 | 0.1753 | 0.4286 | 0.3382 | 0.7259 | 0.7803 | 0.9770 | 0.2403 | 0.4032 |
| **LPC 17:0** | 0.1642 | 0.3939 | 0.8513 | 0.9837 | 0.1484 | 0.4515 | 0.6853 | 0.9822 | 0.3144 | 0.5172 | 0.1399 | 0.7259 | 0.7613 | 0.9770 | 0.4325 | 0.5314 |
| **LPC 18:0** | 0.1557 | 0.3939 | 0.9596 | 0.9918 | 0.2001 | 0.5075 | 0.7469 | 0.9948 | 0.3165 | 0.5172 | 0.1932 | 0.7259 | 0.7604 | 0.9770 | 0.4089 | 0.5314 |
| **LPC 18:1** | 0.2201 | 0.4577 | 0.6567 | 0.9620 | 0.1463 | 0.4515 | 0.3321 | 0.7918 | 0.2611 | 0.4920 | 0.3253 | 0.7259 | 0.5374 | 0.9770 | 0.0890 | 0.2313 |
| **LPC 18:2** | 0.1395 | 0.3817 | 0.3247 | 0.7678 | 0.0698 | 0.4405 | 0.2522 | 0.7918 | 0.1424 | 0.3971 | 0.2727 | 0.7259 | 0.6610 | 0.9770 | 0.0951 | 0.2336 |
| **LPC 19:0** | 0.3101 | 0.5119 | 0.4617 | 0.8279 | 0.3886 | 0.6217 | 0.9389 | 0.9948 | 0.2308 | 0.4848 | 0.8176 | 0.9243 | 0.6442 | 0.9770 | 0.4279 | 0.5314 |
| **LPC 20:1** | 0.1096 | 0.3298 | 0.2180 | 0.7678 | 0.5890 | 0.7754 | 0.2556 | 0.7918 | 0.0703 | 0.3482 | 0.9932 | 0.9963 | 0.6089 | 0.9770 | 0.0488 | 0.1721 |
| **LPC 20:2** | 0.7477 | 0.8110 | 0.1206 | 0.7678 | 0.1841 | 0.4921 | 0.6594 | 0.9822 | 0.4728 | 0.6224 | 0.9963 | 0.9963 | 0.3981 | 0.9770 | 0.9698 | 0.9792 |
| **LPC 20:3** | 0.2770 | 0.5119 | 0.8826 | 0.9918 | 0.1300 | 0.4515 | 0.3418 | 0.7918 | 0.3523 | 0.5452 | 0.2438 | 0.7259 | 0.4789 | 0.9770 | 0.0683 | 0.2013 |
| **LPC 20:4** | 0.0220 | 0.2093 | 0.8063 | 0.9622 | 0.3344 | 0.5521 | 0.1617 | 0.7918 | 0.0654 | 0.3482 | 0.3502 | 0.7259 | 0.1932 | 0.9770 | 0.0010 | 0.0334 |
| **LPC 20:5** | 0.0282 | 0.2257 | 0.6206 | 0.9492 | 0.3057 | 0.5312 | 0.2320 | 0.7918 | 0.0635 | 0.3482 | 0.2183 | 0.7259 | 0.1612 | 0.9770 | 0.0058 | 0.0792 |
| **LPC 22:5** | 0.2166 | 0.4577 | 0.9863 | 0.9918 | 0.2284 | 0.5276 | 0.3959 | 0.7918 | 0.3617 | 0.5452 | 0.2853 | 0.7259 | 0.5037 | 0.9770 | 0.0246 | 0.1116 |
| **LPC 22:6** | 0.0154 | 0.2093 | 0.2574 | 0.7678 | 0.3177 | 0.5416 | 0.3469 | 0.7918 | 0.1227 | 0.3971 | 0.1895 | 0.7259 | 0.1390 | 0.9770 | 0.0117 | 0.0870 |
| **LPE 16:0** | 0.0063 | 0.1420 | 0.3606 | 0.7678 | 0.9131 | 0.9496 | 0.6980 | 0.9822 | 0.0924 | 0.3971 | 0.3964 | 0.7259 | 0.3690 | 0.9770 | 0.0097 | 0.0870 |
| **LPE 18:0** | 0.3638 | 0.5189 | 0.3445 | 0.7678 | 0.0542 | 0.4405 | 0.9851 | 0.9948 | 0.2777 | 0.4920 | 0.2319 | 0.7259 | 0.6402 | 0.9770 | 0.5173 | 0.6045 |
| **LPE 18:1** | 0.2403 | 0.4714 | 0.4451 | 0.8266 | 0.2923 | 0.5312 | 0.3384 | 0.7918 | 0.2010 | 0.4448 | 0.6957 | 0.9136 | 0.7022 | 0.9770 | 0.1322 | 0.2806 |
| **LPE 18:2** | 0.4161 | 0.5620 | 0.2997 | 0.7678 | 0.1158 | 0.4515 | 0.2218 | 0.7918 | 0.2290 | 0.4848 | 0.5665 | 0.8298 | 0.6877 | 0.9770 | 0.1577 | 0.2993 |
| **LPE 20:0** | 0.1468 | 0.3817 | 0.7632 | 0.9622 | 0.2356 | 0.5276 | 0.7376 | 0.9948 | 0.3183 | 0.5172 | 0.2012 | 0.7259 | 0.8732 | 0.9770 | 0.3300 | 0.4577 |
| **LPE 20:4** | 0.0350 | 0.2277 | 0.4048 | 0.7943 | 0.2879 | 0.5312 | 0.1819 | 0.7918 | 0.0379 | 0.3482 | 0.6651 | 0.9102 | 0.5837 | 0.9770 | 0.0068 | 0.0792 |
| **LPE 20:5** | 0.1444 | 0.3817 | 0.5492 | 0.8853 | 0.1893 | 0.4921 | 0.1833 | 0.7918 | 0.0888 | 0.3971 | 0.4118 | 0.7259 | 0.2422 | 0.9770 | 0.0143 | 0.0875 |
| **LPE 22:6** | 0.0068 | 0.1420 | 0.2214 | 0.7678 | 0.7726 | 0.8723 | 0.5327 | 0.9309 | 0.0405 | 0.3482 | 0.5774 | 0.8340 | 0.2054 | 0.9770 | 0.0168 | 0.0912 |
| **Lysine** | 0.3280 | 0.5189 | 0.2193 | 0.7678 | 0.6108 | 0.7941 | 0.6989 | 0.9822 | 0.3286 | 0.5178 | 0.2368 | 0.7259 | 0.2971 | 0.9770 | 0.5093 | 0.6019 |
| **Malic acid** | 0.7896 | 0.8379 | 0.7684 | 0.9622 | 0.8061 | 0.8907 | 0.9621 | 0.9948 | 0.6775 | 0.7880 | 0.7546 | 0.9136 | 0.8097 | 0.9770 | 0.8528 | 0.8869 |
| **Methionine** | 0.0221 | 0.2093 | 0.9887 | 0.9918 | 0.1382 | 0.4515 | 0.2840 | 0.7918 | 0.0651 | 0.3482 | 0.3109 | 0.7259 | 0.3049 | 0.9770 | 0.0079 | 0.0821 |
| **Mevalonic acid** | 0.9208 | 0.9481 | 0.6094 | 0.9460 | 0.2469 | 0.5276 | 0.5460 | 0.9309 | 0.5769 | 0.7059 | 0.6779 | 0.9136 | 0.9142 | 0.9770 | 0.5603 | 0.6333 |
| **Orotic acid** | 0.3046 | 0.5119 | 0.1446 | 0.7678 | 0.4917 | 0.7147 | 0.8073 | 0.9948 | 0.9390 | 0.9574 | 0.3749 | 0.7259 | 0.4488 | 0.9770 | 0.5024 | 0.6006 |
| **Paraxanthine** | 0.8864 | 0.9284 | 0.1645 | 0.7678 | 0.6379 | 0.8191 | 0.2603 | 0.7918 | 0.2647 | 0.4920 | 0.3871 | 0.7259 | 0.8387 | 0.9770 | 0.4103 | 0.5314 |
| **PC 32:1** | 0.3550 | 0.5189 | 0.9230 | 0.9918 | 0.1054 | 0.4515 | 0.9122 | 0.9948 | 0.3879 | 0.5557 | 0.0754 | 0.7259 | 0.9651 | 0.9905 | 0.2706 | 0.4264 |
| **PC 34:1** | 0.0813 | 0.2867 | 0.2169 | 0.7678 | 0.3255 | 0.5460 | 0.7690 | 0.9948 | 0.1871 | 0.4286 | 0.1407 | 0.7259 | 0.3640 | 0.9770 | 0.0175 | 0.0912 |
| **PC 34:2** | 0.0827 | 0.2867 | 0.7901 | 0.9622 | 0.2989 | 0.5312 | 0.8946 | 0.9948 | 0.1831 | 0.4286 | 0.3095 | 0.7259 | 0.7335 | 0.9770 | 0.1474 | 0.2947 |
| **PC 36:2** | 0.0482 | 0.2617 | 0.5489 | 0.8853 | 0.3522 | 0.5723 | 0.8162 | 0.9948 | 0.3242 | 0.5178 | 0.1156 | 0.7259 | 0.7922 | 0.9770 | 0.1924 | 0.3510 |
| **PC 36:3** | 0.1609 | 0.3939 | 0.3949 | 0.7943 | 0.4039 | 0.6269 | 0.6420 | 0.9822 | 0.4914 | 0.6309 | 0.1513 | 0.7259 | 0.8057 | 0.9770 | 0.2530 | 0.4049 |
| **PC 36:4** | 0.0015 | 0.1318 | 0.1541 | 0.7678 | 0.8724 | 0.9353 | 0.8915 | 0.9948 | 0.0121 | 0.3482 | 0.4805 | 0.7906 | 0.4852 | 0.9770 | 0.0006 | 0.0334 |
| **PC 38:5** | 0.0259 | 0.2243 | 0.1783 | 0.7678 | 0.4796 | 0.7147 | 0.9644 | 0.9948 | 0.1192 | 0.3971 | 0.1320 | 0.7259 | 0.5577 | 0.9770 | 0.0069 | 0.0792 |
| **PC 38:6** | 0.0184 | 0.2093 | 0.0109 | 0.7678 | 0.7527 | 0.8698 | 0.6008 | 0.9822 | 0.1280 | 0.3971 | 0.2432 | 0.7259 | 0.4358 | 0.9770 | 0.0529 | 0.1721 |
| **PC 40:7** | 0.0030 | 0.1318 | 0.0307 | 0.7678 | 0.7720 | 0.8723 | 0.6476 | 0.9822 | 0.1737 | 0.4286 | 0.3034 | 0.7259 | 0.3112 | 0.9770 | 0.0009 | 0.0334 |
| **PC 40:8** | 0.9922 | 0.9922 | 0.7205 | 0.9622 | 0.7228 | 0.8492 | 0.1759 | 0.7918 | 0.7827 | 0.8447 | 0.5441 | 0.8175 | 0.4537 | 0.9770 | 0.2853 | 0.4331 |
| **Phenylalanine** | 0.0579 | 0.2617 | 0.5273 | 0.8853 | 0.0879 | 0.4515 | 0.1883 | 0.7918 | 0.0490 | 0.3482 | 0.4081 | 0.7259 | 0.4521 | 0.9770 | 0.0104 | 0.0870 |
| **Proline** | 0.3232 | 0.5189 | 0.0199 | 0.7678 | 0.2673 | 0.5276 | 0.5242 | 0.9309 | 0.0045 | 0.3482 | 0.8582 | 0.9305 | 0.1520 | 0.9770 | 0.1583 | 0.2993 |
| **Serine** | 0.7882 | 0.8379 | 0.8253 | 0.9644 | 0.1865 | 0.4921 | 0.2593 | 0.7918 | 0.6971 | 0.7881 | 0.5502 | 0.8175 | 0.3498 | 0.9770 | 0.3084 | 0.4431 |
| **SM 32:1** | 0.1962 | 0.4435 | 0.8047 | 0.9622 | 0.0766 | 0.4405 | 0.9564 | 0.9948 | 0.2849 | 0.4935 | 0.1383 | 0.7259 | 0.9004 | 0.9770 | 0.2514 | 0.4049 |
| **SM 32:2** | 0.5350 | 0.6469 | 0.9352 | 0.9918 | 0.0569 | 0.4405 | 0.8291 | 0.9948 | 0.5571 | 0.6897 | 0.0762 | 0.7259 | 0.7459 | 0.9770 | 0.3822 | 0.5230 |
| **SM 33:1** | 0.2435 | 0.4714 | 0.7602 | 0.9622 | 0.1487 | 0.4515 | 0.3140 | 0.7918 | 0.3901 | 0.5557 | 0.1474 | 0.7259 | 0.2723 | 0.9770 | 0.0477 | 0.1721 |
| **SM 34:1** | 0.2717 | 0.5119 | 0.9810 | 0.9918 | 0.0495 | 0.4405 | 0.1364 | 0.7918 | 0.1888 | 0.4286 | 0.1115 | 0.7259 | 0.0852 | 0.9770 | 0.0265 | 0.1149 |
| **SM 34:2** | 0.2947 | 0.5119 | 0.7407 | 0.9622 | 0.0409 | 0.4405 | 0.3741 | 0.7918 | 0.2505 | 0.4920 | 0.1520 | 0.7259 | 0.4197 | 0.9770 | 0.0933 | 0.2336 |
| **SM 35:2** | 0.2976 | 0.5119 | 0.2659 | 0.7678 | 0.0738 | 0.4405 | 0.2335 | 0.7918 | 0.1451 | 0.3971 | 0.3159 | 0.7259 | 0.5461 | 0.9770 | 0.0708 | 0.2013 |
| **SM 36:2** | 0.1050 | 0.3298 | 0.7022 | 0.9622 | 0.1706 | 0.4921 | 0.4792 | 0.9309 | 0.1211 | 0.3971 | 0.1935 | 0.7259 | 0.3061 | 0.9770 | 0.0343 | 0.1372 |
| **Taurine** | 0.1883 | 0.4352 | 0.2401 | 0.7678 | 0.7267 | 0.8492 | 0.2540 | 0.7918 | 0.8034 | 0.8526 | 0.7786 | 0.9136 | 0.1147 | 0.9770 | 0.0247 | 0.1116 |
| **Transcinnamic acid** | 0.1366 | 0.3817 | 0.2521 | 0.7678 | 0.1290 | 0.4515 | 0.1219 | 0.7918 | 0.0583 | 0.3482 | 0.7131 | 0.9136 | 0.6560 | 0.9770 | 0.0228 | 0.1116 |
| **Tryptophan** | 0.0733 | 0.2823 | 0.7932 | 0.9622 | 0.0147 | 0.4405 | 0.9436 | 0.9948 | 0.2606 | 0.4920 | 0.0154 | 0.7259 | 0.9243 | 0.9770 | 0.3058 | 0.4431 |
| **Tyrosine** | 0.0562 | 0.2617 | 0.9629 | 0.9918 | 0.0944 | 0.4515 | 0.2947 | 0.7918 | 0.1145 | 0.3971 | 0.0509 | 0.7259 | 0.3202 | 0.9770 | 0.0140 | 0.0875 |
| **Uric acid** | 0.3012 | 0.5119 | 0.7855 | 0.9622 | 0.5792 | 0.7722 | 0.3919 | 0.7918 | 0.4590 | 0.6120 | 0.4865 | 0.7906 | 0.3304 | 0.9770 | 0.0716 | 0.2013 |
| **Valine** | 0.9840 | 0.9922 | 0.6449 | 0.9581 | 0.5659 | 0.7722 | 0.2088 | 0.7918 | 0.6896 | 0.7881 | 0.2757 | 0.7259 | 0.1346 | 0.9770 | 0.2005 | 0.3594 |

P a, p-value as estimated by unequal variances t-test; P b, p-value as estimated by unequal variances t-test adjusted for multiple testing according to the false discovery rate method. VLCD, very low-calorie diet; RYGB (1d), immediate effect of gastric bypass surgery; RYGB (6w), 6-week effect of gastric bypass surgery; Cum. Effect, cumulative effect of the intervention.

**Table 7B.** Assessment of difference in lipidomics data between normoglycaemic and T2D patients (fasting plasma samples).

|  | **Occasion:**  **Baseline** | | **Occasion:**  **Diet** | | **Occasion:**  **Surgery** | | **Occasion:**  **Recovery** | | **Effect of VLCD** | | **RYGB (1d)** | | **RYGB (6w)** | | **Cum. effect** | |
| --- | --- | --- | --- | --- | --- | --- | --- | --- | --- | --- | --- | --- | --- | --- | --- | --- |
|  | *P a* | *P b* | *P a* | *P b* | *P a* | *P b* | *P a* | *P b* | *P a* | *P b* | *P a* | *P b* | *P a* | *P b* | *P a* | *P b* |
| **CE16.0*** | 0.6435 | 0.8643 | 0.9757 | 0.9902 | 0.5929 | 0.9814 | 0.6670 | 0.9880 | 0.8904 | 0.9516 | 0.7437 | 0.9486 | 0.7101 | 0.9741 | 0.4165 | 0.7119 |
| **CE18.1*** | 0.0721 | 0.6002 | 0.1568 | 0.7456 | 0.0272 | 0.9814 | 0.1361 | 0.9721 | 0.5432 | 0.7375 | 0.4590 | 0.9486 | 0.8496 | 0.9741 | 0.5836 | 0.7640 |
| **CE18.2*** | 0.1702 | 0.6002 | 0.3046 | 0.7847 | 0.8151 | 0.9814 | 0.9484 | 0.9880 | 0.0882 | 0.7105 | 0.6315 | 0.9486 | 0.6132 | 0.9741 | 0.6150 | 0.7769 |
| **CE18.3*** | 0.0396 | 0.6002 | 0.5549 | 0.9303 | 0.1610 | 0.9814 | 0.2632 | 0.9721 | 0.0614 | 0.7105 | 0.7425 | 0.9486 | 0.3233 | 0.9741 | 0.4609 | 0.7119 |
| **CE20.4*** | 0.8181 | 0.9368 | 0.2284 | 0.7830 | 0.9838 | 0.9838 | 0.0149 | 0.6686 | 0.2938 | 0.7105 | 0.3490 | 0.9486 | 0.5610 | 0.9741 | 0.0430 | 0.5169 |
| **LPC16.0*** | 0.2546 | 0.6547 | 0.0766 | 0.7007 | 0.8703 | 0.9814 | 0.5589 | 0.9721 | 0.0322 | 0.7105 | 0.5397 | 0.9486 | 0.5755 | 0.9741 | 0.1783 | 0.6777 |
| **LPC16.1*** | 0.6482 | 0.8643 | 0.0798 | 0.7007 | 0.4271 | 0.9814 | 0.6846 | 0.9880 | 0.3693 | 0.7105 | 0.5375 | 0.9486 | 0.4743 | 0.9741 | 0.9042 | 0.9515 |
| **LPC18.0*** | 0.2251 | 0.6484 | 0.3409 | 0.7847 | 0.8929 | 0.9814 | 0.9605 | 0.9880 | 0.1076 | 0.7105 | 0.6341 | 0.9486 | 0.5869 | 0.9741 | 0.4429 | 0.7119 |
| **LPC18.1*** | 0.5700 | 0.8643 | 0.2053 | 0.7766 | 0.8984 | 0.9814 | 0.4738 | 0.9721 | 0.2277 | 0.7105 | 0.5725 | 0.9486 | 0.9354 | 0.9741 | 0.3187 | 0.6777 |
| **LPC18.2*** | 0.4125 | 0.7657 | 0.1018 | 0.7007 | 0.4817 | 0.9814 | 0.3838 | 0.9721 | 0.0683 | 0.7105 | 0.7570 | 0.9486 | 0.8979 | 0.9741 | 0.2586 | 0.6777 |
| **LPC20.3*** | 0.4663 | 0.7994 | 0.4742 | 0.8985 | 0.2428 | 0.9814 | 0.9514 | 0.9880 | 0.4014 | 0.7105 | 0.4144 | 0.9486 | 0.5561 | 0.9741 | 0.5264 | 0.7180 |
| **LPC20.4*** | 0.0503 | 0.6002 | 0.5059 | 0.9204 | 0.9526 | 0.9814 | 0.1359 | 0.9721 | 0.0332 | 0.7105 | 0.7049 | 0.9486 | 0.4749 | 0.9741 | 0.0171 | 0.5169 |
| **LPC22.6*** | 0.0666 | 0.6002 | 0.8960 | 0.9902 | 0.8631 | 0.9814 | 0.6947 | 0.9880 | 0.2273 | 0.7105 | 0.8250 | 0.9486 | 0.9606 | 0.9741 | 0.2029 | 0.6777 |
| **PC32.0*** | 0.1857 | 0.6002 | 0.0333 | 0.7007 | 0.6368 | 0.9814 | 0.0323 | 0.6686 | 0.0094 | 0.6788 | 0.3775 | 0.9486 | 0.2901 | 0.9741 | 0.0046 | 0.3318 |
| **PC32.1*** | 0.1922 | 0.6002 | 0.3705 | 0.7847 | 0.2119 | 0.9814 | 0.6753 | 0.9880 | 0.9977 | 0.9977 | 0.7318 | 0.9486 | 0.8271 | 0.9741 | 0.7638 | 0.8483 |
| **PC32.2*** | 0.5758 | 0.8643 | 0.6678 | 0.9427 | 0.1628 | 0.9814 | 0.2965 | 0.9721 | 0.6342 | 0.7942 | 0.2584 | 0.9486 | 0.2342 | 0.9741 | 0.4653 | 0.7119 |
| **PC34.0*** | 0.1678 | 0.6002 | 0.4600 | 0.8951 | 0.8284 | 0.9814 | 0.3456 | 0.9721 | 0.1297 | 0.7105 | 0.7634 | 0.9486 | 0.6755 | 0.9741 | 0.1128 | 0.6777 |
| **PC34.1*** | 0.7360 | 0.9297 | 0.9178 | 0.9902 | 0.4029 | 0.9814 | 0.7673 | 0.9880 | 0.9318 | 0.9516 | 0.3951 | 0.9486 | 0.7114 | 0.9741 | 0.3708 | 0.6777 |
| **PC34.2*** | 0.5646 | 0.8643 | 0.5556 | 0.9303 | 0.8459 | 0.9814 | 0.9937 | 0.9973 | 0.5294 | 0.7375 | 0.2920 | 0.9486 | 0.7620 | 0.9741 | 0.6662 | 0.7818 |
| **PC34.3*** | 0.5593 | 0.8643 | 0.2157 | 0.7766 | 0.5854 | 0.9814 | 0.5638 | 0.9721 | 0.5461 | 0.7375 | 0.7306 | 0.9486 | 0.8778 | 0.9741 | 0.6761 | 0.7818 |
| **PC36.1*** | 0.5452 | 0.8643 | 0.6389 | 0.9427 | 0.4418 | 0.9814 | 0.7805 | 0.9880 | 0.9258 | 0.9516 | 0.5425 | 0.9486 | 0.9252 | 0.9741 | 0.7955 | 0.8678 |
| **PC36.2*** | 0.3366 | 0.6996 | 0.5754 | 0.9415 | 0.8249 | 0.9814 | 0.8950 | 0.9880 | 0.4046 | 0.7105 | 0.5054 | 0.9486 | 0.8213 | 0.9741 | 0.5042 | 0.7119 |
| **PC36.3*** | 0.6306 | 0.8643 | 0.3115 | 0.7847 | 0.7008 | 0.9814 | 0.8806 | 0.9880 | 0.9086 | 0.9516 | 0.7498 | 0.9486 | 0.6464 | 0.9741 | 0.8356 | 0.8980 |
| **PC36.4*** | 0.0733 | 0.6002 | 0.6474 | 0.9427 | 0.5657 | 0.9814 | 0.7751 | 0.9880 | 0.2270 | 0.7105 | 0.8432 | 0.9486 | 0.5179 | 0.9741 | 0.0556 | 0.5169 |
| **PC36.5*** | 0.1436 | 0.6002 | 0.9663 | 0.9902 | 0.7403 | 0.9814 | 0.5239 | 0.9721 | 0.2573 | 0.7105 | 0.6100 | 0.9486 | 0.7054 | 0.9741 | 0.1143 | 0.6777 |
| **PC38.3*** | 0.8977 | 0.9368 | 0.8466 | 0.9675 | 0.9785 | 0.9838 | 0.9973 | 0.9973 | 0.9323 | 0.9516 | 0.8333 | 0.9486 | 0.8420 | 0.9741 | 0.9452 | 0.9585 |
| **PC38.4*** | 0.1207 | 0.6002 | 0.3369 | 0.7847 | 0.4445 | 0.9814 | 0.7658 | 0.9880 | 0.4234 | 0.7112 | 0.9194 | 0.9825 | 0.5326 | 0.9741 | 0.1779 | 0.6777 |
| **PC38.5*** | 0.2533 | 0.6547 | 0.6558 | 0.9427 | 0.7124 | 0.9814 | 0.5467 | 0.9721 | 0.2998 | 0.7105 | 0.9663 | 0.9825 | 0.9316 | 0.9741 | 0.1979 | 0.6777 |
| **PC38.6*** | 0.1054 | 0.6002 | 0.3372 | 0.7847 | 0.2254 | 0.9814 | 0.8813 | 0.9880 | 0.1678 | 0.7105 | 0.3973 | 0.9486 | 0.7431 | 0.9741 | 0.1952 | 0.6777 |
| **PC40.4*** | 0.9558 | 0.9809 | 0.9610 | 0.9902 | 0.7870 | 0.9814 | 0.7527 | 0.9880 | 0.7971 | 0.8967 | 0.7978 | 0.9486 | 0.7757 | 0.9741 | 0.6538 | 0.7818 |
| **PC40.5*** | 0.6619 | 0.8665 | 0.7659 | 0.9675 | 0.6999 | 0.9814 | 0.5203 | 0.9721 | 0.4862 | 0.7375 | 0.9864 | 0.9864 | 0.5180 | 0.9741 | 0.6841 | 0.7818 |
| **PC40.6*** | 0.1201 | 0.6002 | 0.0897 | 0.7007 | 0.1588 | 0.9814 | 0.8135 | 0.9880 | 0.5253 | 0.7375 | 0.6068 | 0.9486 | 0.4729 | 0.9741 | 0.3274 | 0.6777 |
| **SM32.1*** | 0.5913 | 0.8643 | 0.1495 | 0.7456 | 0.8574 | 0.9814 | 0.5254 | 0.9721 | 0.2018 | 0.7105 | 0.6081 | 0.9486 | 0.8931 | 0.9741 | 0.2821 | 0.6777 |
| **SM32.2*** | 0.8584 | 0.9368 | 0.2729 | 0.7847 | 0.9305 | 0.9814 | 0.8249 | 0.9880 | 0.5135 | 0.7375 | 0.4577 | 0.9486 | 0.5488 | 0.9741 | 0.9251 | 0.9515 |
| **SM33.1*** | 0.8430 | 0.9368 | 0.1008 | 0.7007 | 0.7328 | 0.9814 | 0.3636 | 0.9721 | 0.2588 | 0.7105 | 0.5609 | 0.9486 | 0.9285 | 0.9741 | 0.3105 | 0.6777 |
| **SM34.1*** | 0.8019 | 0.9368 | 0.0486 | 0.7007 | 0.2473 | 0.9814 | 0.1297 | 0.9721 | 0.2750 | 0.7105 | 0.5797 | 0.9486 | 0.7828 | 0.9741 | 0.2320 | 0.6777 |
| **SM34.2*** | 0.5814 | 0.8643 | 0.1657 | 0.7456 | 0.8152 | 0.9814 | 0.2612 | 0.9721 | 0.1923 | 0.7105 | 0.5809 | 0.9486 | 0.6943 | 0.9741 | 0.1495 | 0.6777 |
| **SM35.1*** | 0.8260 | 0.9368 | 0.6532 | 0.9427 | 0.9541 | 0.9814 | 0.0266 | 0.6686 | 0.7665 | 0.8760 | 0.7820 | 0.9486 | 0.2295 | 0.9741 | 0.0561 | 0.5169 |
| **SM36.0*** | 0.1295 | 0.6002 | 0.1991 | 0.7766 | 0.4989 | 0.9814 | 0.1408 | 0.9721 | 0.0937 | 0.7105 | 0.6261 | 0.9486 | 0.6034 | 0.9741 | 0.0574 | 0.5169 |
| **SM36.1*** | 0.7135 | 0.9174 | 0.2605 | 0.7847 | 0.1868 | 0.9814 | 0.1290 | 0.9721 | 0.6423 | 0.7942 | 0.8973 | 0.9788 | 0.4381 | 0.9741 | 0.3664 | 0.6777 |
| **SM36.2*** | 0.2746 | 0.6589 | 0.3633 | 0.7847 | 0.5012 | 0.9814 | 0.3837 | 0.9721 | 0.9384 | 0.9516 | 0.7742 | 0.9486 | 0.9846 | 0.9846 | 0.9209 | 0.9515 |
| **SM38.1*** | 0.3086 | 0.6841 | 0.8459 | 0.9675 | 0.9387 | 0.9814 | 0.5615 | 0.9721 | 0.4670 | 0.7375 | 0.9430 | 0.9825 | 0.7398 | 0.9741 | 0.2256 | 0.6777 |
| **SM38.2*** | 0.3595 | 0.6996 | 0.0944 | 0.7007 | 0.4900 | 0.9814 | 0.1629 | 0.9721 | 0.6619 | 0.7942 | 0.5327 | 0.9486 | 0.8548 | 0.9741 | 0.4897 | 0.7119 |
| **SM39.1*** | 0.2718 | 0.6589 | 0.8339 | 0.9675 | 0.8971 | 0.9814 | 0.8559 | 0.9880 | 0.3457 | 0.7105 | 0.7919 | 0.9486 | 0.9380 | 0.9741 | 0.3765 | 0.6777 |
| **SM40.0*** | 0.4147 | 0.7657 | 0.1071 | 0.7007 | 0.6496 | 0.9814 | 0.0371 | 0.6686 | 0.5363 | 0.7375 | 0.4388 | 0.9486 | 0.5844 | 0.9741 | 0.2402 | 0.6777 |
| **SM40.1*** | 0.6137 | 0.8643 | 0.6875 | 0.9483 | 0.9126 | 0.9814 | 0.7925 | 0.9880 | 0.5700 | 0.7461 | 0.6599 | 0.9486 | 0.9412 | 0.9741 | 0.5285 | 0.7180 |
| **SM40.2*** | 0.8590 | 0.9368 | 0.6130 | 0.9427 | 0.7707 | 0.9814 | 0.4244 | 0.9721 | 0.6294 | 0.7942 | 0.9590 | 0.9825 | 0.4446 | 0.9741 | 0.5042 | 0.7119 |
| **SM41.1*** | 0.7667 | 0.9368 | 0.3586 | 0.7847 | 0.8644 | 0.9814 | 0.7849 | 0.9880 | 0.4248 | 0.7112 | 0.6877 | 0.9486 | 0.6437 | 0.9741 | 0.6452 | 0.7818 |
| **SM41.2*** | 0.7792 | 0.9368 | 0.1960 | 0.7766 | 0.8596 | 0.9814 | 0.2929 | 0.9721 | 0.3097 | 0.7105 | 0.6159 | 0.9486 | 0.8280 | 0.9741 | 0.2347 | 0.6777 |
| **SM42.1*** | 0.8227 | 0.9368 | 0.3876 | 0.7974 | 0.8656 | 0.9814 | 0.5671 | 0.9721 | 0.4632 | 0.7375 | 0.6822 | 0.9486 | 0.9291 | 0.9741 | 0.4921 | 0.7119 |
| **SM42.2*** | 0.9814 | 0.9814 | 0.0915 | 0.7007 | 0.4213 | 0.9814 | 0.1389 | 0.9721 | 0.2889 | 0.7105 | 0.6596 | 0.9486 | 0.7263 | 0.9741 | 0.1473 | 0.6777 |
| **SM42.3*** | 0.9673 | 0.9809 | 0.2555 | 0.7847 | 0.3345 | 0.9814 | 0.1731 | 0.9721 | 0.5019 | 0.7375 | 0.8121 | 0.9486 | 0.5874 | 0.9741 | 0.3183 | 0.6777 |
| **SM43.1*** | 0.6044 | 0.8643 | 0.2678 | 0.7847 | 0.3675 | 0.9814 | 0.8908 | 0.9880 | 0.8966 | 0.9516 | 0.8700 | 0.9637 | 0.5143 | 0.9741 | 0.7658 | 0.8483 |
| **SM43.2*** | 0.8861 | 0.9368 | 0.1574 | 0.7456 | 0.7422 | 0.9814 | 0.3815 | 0.9721 | 0.5531 | 0.7375 | 0.5637 | 0.9486 | 0.8930 | 0.9741 | 0.3448 | 0.6777 |
| **SM44.2*** | 0.3587 | 0.6996 | 0.2907 | 0.7847 | 0.3281 | 0.9814 | 0.3605 | 0.9721 | 0.7535 | 0.8750 | 0.9689 | 0.9825 | 0.8700 | 0.9741 | 0.6794 | 0.7818 |
| **TG48.1*** | 0.3521 | 0.6996 | 0.6395 | 0.9427 | 0.8225 | 0.9814 | 0.8156 | 0.9880 | 0.3144 | 0.7105 | 0.4224 | 0.9486 | 0.6872 | 0.9741 | 0.6004 | 0.7719 |
| **TG48.2*** | 0.3018 | 0.6841 | 0.6981 | 0.9483 | 0.7468 | 0.9814 | 0.8545 | 0.9880 | 0.3700 | 0.7105 | 0.4192 | 0.9486 | 0.7548 | 0.9741 | 0.4306 | 0.7119 |
| **TG50.0*** | 0.0859 | 0.6002 | 0.8300 | 0.9675 | 0.4438 | 0.9814 | 0.3492 | 0.9721 | 0.2637 | 0.7105 | 0.5288 | 0.9486 | 0.7572 | 0.9741 | 0.3346 | 0.6777 |
| **TG50.1*** | 0.2001 | 0.6002 | 0.9902 | 0.9902 | 0.5879 | 0.9814 | 0.9581 | 0.9880 | 0.2076 | 0.7105 | 0.4869 | 0.9486 | 0.9500 | 0.9741 | 0.1440 | 0.6777 |
| **TG50.2*** | 0.3136 | 0.6841 | 0.8330 | 0.9675 | 0.7153 | 0.9814 | 0.7948 | 0.9880 | 0.3955 | 0.7105 | 0.4752 | 0.9486 | 0.7748 | 0.9741 | 0.4260 | 0.7119 |
| **TG50.3*** | 0.2458 | 0.6547 | 0.7474 | 0.9675 | 0.6663 | 0.9814 | 0.6316 | 0.9880 | 0.3579 | 0.7105 | 0.4187 | 0.9486 | 0.5949 | 0.9741 | 0.5017 | 0.7119 |
| **TG50.4*** | 0.4595 | 0.7994 | 0.3998 | 0.7995 | 0.8810 | 0.9814 | 0.6941 | 0.9880 | 0.3625 | 0.7105 | 0.6820 | 0.9486 | 0.4548 | 0.9741 | 0.9636 | 0.9636 |
| **TG52.1*** | 0.0683 | 0.6002 | 0.0991 | 0.7007 | 0.1077 | 0.9814 | 0.5595 | 0.9721 | 0.7155 | 0.8446 | 0.4670 | 0.9486 | 0.4644 | 0.9741 | 0.1132 | 0.6777 |
| **TG52.2*** | 0.1628 | 0.6002 | 0.5126 | 0.9204 | 0.2347 | 0.9814 | 0.4687 | 0.9721 | 0.3672 | 0.7105 | 0.4014 | 0.9486 | 0.9348 | 0.9741 | 0.2564 | 0.6777 |
| **TG52.3*** | 0.1259 | 0.6002 | 0.7777 | 0.9675 | 0.2763 | 0.9814 | 0.3907 | 0.9721 | 0.2047 | 0.7105 | 0.3535 | 0.9486 | 0.5899 | 0.9741 | 0.3401 | 0.6777 |
| **TG52.4*** | 0.0913 | 0.6002 | 0.9893 | 0.9902 | 0.3597 | 0.9814 | 0.3871 | 0.9721 | 0.2168 | 0.7105 | 0.3678 | 0.9486 | 0.4973 | 0.9741 | 0.3443 | 0.6777 |
| **TG52.5*** | 0.1768 | 0.6002 | 0.9175 | 0.9902 | 0.6686 | 0.9814 | 0.4738 | 0.9721 | 0.3849 | 0.7105 | 0.6131 | 0.9486 | 0.5445 | 0.9741 | 0.5657 | 0.7543 |
| **TG54.3*** | 0.8775 | 0.9368 | 0.5241 | 0.9204 | 0.8252 | 0.9814 | 0.1981 | 0.9721 | 0.6553 | 0.7942 | 0.6695 | 0.9486 | 0.5034 | 0.9741 | 0.3550 | 0.6777 |
| **TG54.4*** | 0.4370 | 0.7867 | 0.1303 | 0.7456 | 0.6463 | 0.9814 | 0.3462 | 0.9721 | 0.1486 | 0.7105 | 0.5962 | 0.9486 | 0.8656 | 0.9741 | 0.2030 | 0.6777 |
| **TG54.5*** | 0.1257 | 0.6002 | 0.7802 | 0.9675 | 0.7924 | 0.9814 | 0.3752 | 0.9721 | 0.1533 | 0.7105 | 0.6371 | 0.9486 | 0.5692 | 0.9741 | 0.0332 | 0.5169 |
| **TG54.6*** | 0.0872 | 0.6002 | 0.7579 | 0.9675 | 0.7834 | 0.9814 | 0.9130 | 0.9880 | 0.1738 | 0.7105 | 0.4221 | 0.9486 | 0.8499 | 0.9741 | 0.1381 | 0.6777 |
| **TG56.6*** | 0.1639 | 0.6002 | 0.9487 | 0.9902 | 0.8114 | 0.9814 | 0.4250 | 0.9721 | 0.2903 | 0.7105 | 0.7792 | 0.9486 | 0.5015 | 0.9741 | 0.0432 | 0.5169 |

P a, p-value as estimated by unequal variances t-test; P b, p-value as estimated by unequal variances t-test adjusted for multiple testing according to the false discovery rate method. VLCD, very low-calorie diet; RYGB (1d), immediate effect of gastric bypass surgery; RYGB (6w), 6-week effect of gastric bypass surgery; Cum. Effect, cumulative effect of the intervention.

**Figure S8.** Evaluation of principal component scores using untargeted data.

|  | **DIFF** | **LWR** | **UPR** | **P** |
| --- | --- | --- | --- | --- |
| Baseline-VLCD | 5.80 | 1.37 | 10.22 | 0.0052 |
| RYGB (6w)-VLCD | 4.51 | 0.09 | 8.94 | 0.0439 |
| RYGB (1d)-VLCD | -3.54 | -7.96 | 0.89 | 0.1627 |
| RYGB (6w)-Baseline | -1.28 | -5.71 | 3.14 | 0.8708 |
| RYGB (1d)-Baseline | -9.33 | -13.76 | -4.91 | <0.0001 |
| RYGB (1d)- RYGB (6w) | -8.05 | -12.48 | -3.62 | 0.0001 |

Analysis Of Variance (ANOVA) models were fitted using scores along principal component 4 for principal component analysis using untargeted data, followed by post-hoc analysis testing using Tukey Honest Significant Differences. DIFF, the difference in the observed means; LWR, lower end point of the interval; UPR, upper end point; P, p-value after adjustment for the multiple comparisons; RYGB (1d), Roux-en-Y gastric bypass surgery after Day 1; RYGB (6w), 6-weeks after surgery; VLCD, very low-calorie diet.

**Table S9A.** Assessment of associations and correlation analyses between metabolites and clinical parameters.

|  | **Glucose** | | | **Insulin** | | | **GIP** | | | **GLP-1** | | | **HOMA-IR** | | | **HOMA-B** | | | **HbA1c** | | | **Matsuda** | | |
| --- | --- | --- | --- | --- | --- | --- | --- | --- | --- | --- | --- | --- | --- | --- | --- | --- | --- | --- | --- | --- | --- | --- | --- | --- |
|  | corr. | FC | P | corr. | FC | P | corr. | FC | P | corr. | FC | P | corr. | FC | P | corr. | FC | P | corr. | FC | P | corr. | FC | P |
|  | coef |  |  | coef. |  |  | coef. |  |  | coef. |  |  | coef. |  |  | coef. |  |  | coef. |  |  | coef. |  |  |
| 1-Methylhistidine | -0.124 | -0.035 | 0.606 | -0.107 | -0.048 | 0.606 | -0.231 | -0.117 | 0.606 | 0.045 | 0.051 | 0.671 | 0.008 | 0.021 | 1.000 | -0.012 | -0.008 | 1.000 | 0.111 | 0.022 | 0.606 | 0.092 | 0.038 | 0.606 |
| 3-Hydroxybutyrate | 0.178 | 0.068 | 0.345 | -0.129 | -0.070 | 0.616 | -0.328 | -0.176 | 0.099 | 0.191 | 0.152 | 0.345 | -0.152 | -0.106 | 0.567 | -0.046 | -0.043 | 0.907 | 0.087 | 0.023 | 0.616 | 0.018 | 0.005 | 1.000 |
| Arginine | -0.116 | -0.033 | 0.787 | -0.143 | -0.089 | 0.709 | -0.247 | -0.173 | 0.252 | 0.134 | 0.129 | 0.589 | 0.014 | 0.065 | 0.803 | -0.006 | -0.031 | 0.988 | 0.030 | 0.024 | 0.779 | 0.091 | 0.037 | 0.803 |
| Asparagine | -0.085 | -0.028 | 0.756 | -0.159 | -0.102 | 0.562 | -0.397 | -0.270 | 0.004 | 0.064 | 0.092 | 0.688 | -0.047 | -0.005 | 1.000 | -0.007 | -0.017 | 1.000 | 0.116 | 0.040 | 0.475 | 0.083 | 0.044 | 0.756 |
| Caffeine | 0.125 | 0.014 | 0.919 | 0.202 | 0.039 | 0.385 | 0.178 | 0.040 | 0.384 | -0.267 | -0.081 | 0.053 | 0.000 | -0.009 | 1.000 | 0.032 | 0.010 | 1.000 | 0.096 | 0.006 | 1.000 | 0.010 | 0.001 | 1.000 |
| Carnitine | 0.068 | 0.033 | 0.975 | -0.094 | -0.145 | 0.917 | -0.088 | -0.105 | 0.975 | 0.269 | 0.555 | 0.047 | 0.000 | -0.034 | 0.975 | -0.053 | -0.054 | 0.975 | 0.146 | 0.050 | 0.917 | -0.066 | -0.043 | 0.975 |
| Carnitine C10:0 | -0.006 | -0.003 | 1.000 | -0.405 | -0.212 | 0.004 | -0.004 | -0.001 | 1.000 | 0.008 | 0.004 | 1.000 | -0.094 | -0.073 | 0.671 | -0.224 | -0.166 | 0.133 | -0.121 | -0.025 | 0.480 | 0.342 | 0.148 | 0.013 |
| Carnitine C10:1 | -0.026 | -0.005 | 0.983 | -0.394 | -0.248 | 0.004 | -0.042 | -0.030 | 0.958 | 0.017 | 0.021 | 0.983 | -0.073 | -0.048 | 0.958 | -0.213 | -0.203 | 0.190 | -0.128 | -0.026 | 0.687 | 0.406 | 0.211 | 0.004 |
| Carnitine C10:2 | -0.023 | -0.025 | 0.957 | -0.108 | -0.110 | 0.927 | 0.093 | 0.079 | 0.957 | -0.087 | -0.058 | 0.957 | 0.068 | 0.089 | 0.957 | -0.016 | -0.007 | 1.000 | -0.066 | -0.030 | 0.957 | 0.139 | 0.131 | 0.535 |
| Carnitine C12:0 | 0.073 | 0.020 | 1.000 | -0.401 | -0.264 | 0.004 | 0.012 | -0.002 | 1.000 | -0.032 | 0.002 | 1.000 | -0.077 | -0.079 | 0.876 | -0.245 | -0.214 | 0.153 | 0.014 | -0.003 | 1.000 | 0.309 | 0.178 | 0.013 |
| Carnitine C12:1 | 0.051 | 0.014 | 0.919 | -0.390 | -0.229 | 0.006 | -0.081 | -0.054 | 0.869 | 0.021 | 0.045 | 0.919 | -0.058 | -0.043 | 0.919 | -0.178 | -0.140 | 0.361 | -0.030 | -0.010 | 0.919 | 0.353 | 0.179 | 0.006 |
| Carnitine C14:0 | 0.242 | 0.114 | 0.210 | -0.417 | -0.383 | 0.002 | -0.140 | -0.131 | 0.392 | -0.049 | 0.012 | 1.000 | -0.057 | -0.086 | 0.747 | -0.292 | -0.345 | 0.082 | 0.115 | 0.025 | 0.747 | 0.279 | 0.236 | 0.023 |
| Carnitine C14:1 | 0.075 | 0.020 | 0.923 | -0.482 | -0.302 | 0.000 | -0.161 | -0.098 | 0.492 | 0.054 | 0.069 | 0.738 | -0.100 | -0.097 | 0.655 | -0.274 | -0.229 | 0.082 | 0.011 | -0.004 | 1.000 | 0.348 | 0.190 | 0.006 |
| Carnitine C14:2 | 0.039 | 0.015 | 1.000 | -0.462 | -0.310 | 0.001 | -0.146 | -0.104 | 0.550 | 0.064 | 0.083 | 0.828 | -0.125 | -0.105 | 0.770 | -0.228 | -0.220 | 0.165 | -0.003 | 0.001 | 1.000 | 0.392 | 0.222 | 0.002 |
| Carnitine C16:0 | 0.338 | 0.212 | 0.020 | -0.367 | -0.412 | 0.010 | -0.194 | -0.165 | 0.570 | 0.060 | 0.065 | 0.953 | -0.057 | -0.135 | 0.723 | -0.326 | -0.491 | 0.022 | 0.047 | 0.004 | 1.000 | 0.177 | 0.169 | 0.349 |
| Carnitine C18:0 | 0.420 | 0.298 | 0.001 | -0.458 | -0.576 | 0.000 | -0.185 | -0.157 | 0.544 | 0.039 | 0.013 | 1.000 | -0.043 | -0.141 | 0.643 | -0.469 | -0.808 | 0.000 | 0.129 | 0.043 | 0.603 | 0.190 | 0.199 | 0.221 |
| Carnitine C18:1 | 0.208 | 0.106 | 0.281 | -0.401 | -0.389 | 0.003 | -0.222 | -0.165 | 0.298 | 0.090 | 0.092 | 0.662 | -0.088 | -0.161 | 0.496 | -0.322 | -0.416 | 0.038 | -0.020 | -0.021 | 0.690 | 0.234 | 0.192 | 0.118 |
| Carnitine C18:2 | 0.116 | 0.073 | 0.690 | -0.379 | -0.440 | 0.007 | -0.202 | -0.199 | 0.417 | 0.092 | 0.159 | 0.690 | -0.131 | -0.224 | 0.611 | -0.338 | -0.547 | 0.021 | -0.008 | -0.010 | 1.000 | 0.272 | 0.270 | 0.059 |
| Carnitine C2:0 | 0.064 | 0.022 | 0.941 | -0.269 | -0.209 | 0.145 | -0.285 | -0.197 | 0.155 | 0.256 | 0.279 | 0.141 | -0.134 | -0.152 | 0.400 | -0.101 | -0.090 | 0.733 | 0.056 | 0.007 | 0.943 | 0.159 | 0.111 | 0.319 |
| Carnitine C3:0 | 0.154 | 0.062 | 1.000 | 0.021 | -0.006 | 1.000 | 0.043 | 0.044 | 1.000 | 0.131 | 0.342 | 0.420 | 0.078 | 0.050 | 1.000 | -0.087 | -0.062 | 1.000 | 0.101 | -0.001 | 1.000 | -0.065 | 0.007 | 1.000 |
| Carnitine C5:0 | 0.058 | 0.003 | 1.000 | 0.011 | -0.004 | 1.000 | 0.048 | 0.034 | 1.000 | 0.090 | 0.158 | 1.000 | -0.063 | -0.103 | 1.000 | -0.054 | -0.017 | 1.000 | -0.026 | -0.030 | 1.000 | 0.011 | 0.041 | 1.000 |
| Carnitine C6:0 | 0.164 | 0.068 | 0.385 | -0.411 | -0.293 | 0.003 | -0.120 | -0.077 | 0.549 | 0.090 | 0.097 | 0.549 | -0.088 | -0.087 | 0.611 | -0.289 | -0.290 | 0.050 | -0.065 | -0.020 | 0.628 | 0.321 | 0.193 | 0.020 |
| Carnitine C8:0 | -0.003 | -0.004 | 0.998 | -0.419 | -0.231 | 0.004 | -0.034 | -0.021 | 0.894 | 0.021 | 0.026 | 0.894 | -0.103 | -0.081 | 0.628 | -0.250 | -0.192 | 0.099 | -0.107 | -0.025 | 0.557 | 0.370 | 0.172 | 0.004 |
| Carnitine C8:1 | 0.126 | 0.024 | 0.863 | 0.157 | 0.106 | 0.652 | 0.204 | 0.131 | 0.573 | -0.208 | -0.135 | 0.652 | 0.131 | 0.090 | 0.810 | 0.031 | 0.097 | 0.810 | 0.116 | 0.005 | 1.000 | -0.097 | -0.016 | 0.979 |
| Creatine | -0.020 | -0.010 | 1.000 | -0.028 | -0.015 | 1.000 | -0.255 | -0.131 | 0.142 | 0.105 | 0.099 | 0.462 | -0.028 | -0.016 | 1.000 | -0.019 | -0.006 | 1.000 | 0.214 | 0.039 | 0.223 | -0.117 | -0.041 | 0.821 |
| Glucosamine-6-phosphate | -0.068 | -0.021 | 0.963 | -0.040 | -0.019 | 1.000 | -0.159 | -0.080 | 0.878 | -0.003 | 0.014 | 1.000 | 0.049 | 0.041 | 1.000 | -0.008 | -0.002 | 1.000 | 0.102 | 0.019 | 0.906 | -0.032 | -0.010 | 1.000 |
| Glyceric acid | -0.031 | -0.024 | 0.985 | -0.038 | -0.039 | 0.985 | -0.008 | 0.008 | 1.000 | -0.214 | -0.247 | 0.328 | -0.093 | -0.140 | 0.700 | -0.009 | -0.002 | 1.000 | 0.130 | 0.034 | 0.700 | 0.206 | 0.149 | 0.328 |
| Hippuric acid | -0.036 | -0.019 | 0.721 | 0.104 | 0.040 | 0.698 | 0.099 | 0.047 | 0.698 | -0.112 | -0.078 | 0.660 | 0.108 | 0.040 | 0.724 | 0.074 | 0.056 | 0.698 | -0.041 | -0.013 | 0.698 | 0.092 | 0.041 | 0.698 |
| Histidine | -0.118 | -0.035 | 0.893 | -0.047 | -0.021 | 0.972 | -0.284 | -0.172 | 0.221 | 0.067 | 0.071 | 0.893 | 0.020 | 0.053 | 0.972 | 0.046 | 0.029 | 0.972 | 0.106 | 0.034 | 0.652 | 0.071 | 0.029 | 0.972 |
| Hypoxanthine | -0.028 | -0.007 | 0.995 | -0.191 | -0.075 | 0.238 | -0.265 | -0.107 | 0.124 | 0.202 | 0.134 | 0.124 | -0.100 | -0.043 | 0.693 | -0.039 | -0.019 | 0.995 | -0.206 | -0.031 | 0.207 | 0.103 | 0.039 | 0.536 |
| Kynurenine | 0.216 | 0.174 | 0.151 | 0.047 | 0.064 | 0.921 | 0.211 | 0.283 | 0.155 | -0.191 | -0.334 | 0.182 | -0.023 | -0.029 | 1.000 | -0.050 | -0.103 | 0.910 | -0.268 | -0.120 | 0.097 | -0.003 | -0.017 | 1.000 |
| Leucine-Isoleucine | 0.175 | 0.260 | 0.367 | -0.121 | -0.232 | 1.000 | -0.085 | -0.158 | 1.000 | 0.013 | 0.036 | 1.000 | 0.031 | 0.182 | 1.000 | -0.003 | -0.058 | 1.000 | -0.023 | 0.013 | 1.000 | 0.050 | 0.055 | 1.000 |
| LPC 14:0 | 0.127 | 0.063 | 0.517 | 0.139 | 0.109 | 0.517 | 0.250 | 0.141 | 0.383 | -0.256 | -0.201 | 0.374 | 0.182 | 0.226 | 0.374 | 0.039 | 0.034 | 1.000 | -0.018 | 0.003 | 1.000 | -0.106 | -0.064 | 0.726 |
| LPC 16:0 | 0.255 | 0.489 | 0.080 | -0.133 | -0.374 | 0.709 | -0.005 | -0.013 | 1.000 | -0.033 | -0.038 | 1.000 | 0.118 | 0.604 | 0.626 | -0.293 | -1.286 | 0.064 | 0.032 | 0.060 | 0.866 | 0.130 | 0.311 | 0.709 |
| LPC 20:4 | 0.156 | 0.091 | 0.595 | -0.057 | -0.045 | 0.929 | -0.150 | -0.146 | 0.595 | 0.057 | 0.102 | 0.929 | 0.008 | 0.043 | 0.929 | -0.160 | -0.214 | 0.595 | 0.001 | 0.008 | 0.938 | 0.056 | 0.042 | 0.929 |
| LPC 22:6 | 0.240 | 0.127 | 0.415 | -0.123 | -0.124 | 0.663 | -0.124 | -0.109 | 0.699 | 0.013 | 0.043 | 0.902 | 0.024 | 0.014 | 1.000 | -0.148 | -0.182 | 0.663 | 0.173 | 0.052 | 0.648 | 0.064 | 0.066 | 0.774 |
| LPE 16:0 | 0.123 | 0.078 | 0.682 | 0.068 | 0.073 | 0.874 | -0.191 | -0.204 | 0.682 | 0.098 | 0.148 | 0.682 | 0.142 | 0.199 | 0.682 | 0.044 | 0.115 | 0.868 | 0.152 | 0.052 | 0.682 | -0.007 | 0.009 | 1.000 |
| LPE 20:4 | 0.254 | 0.233 | 0.258 | 0.060 | 0.089 | 0.993 | 0.000 | 0.034 | 0.993 | 0.059 | 0.079 | 0.993 | 0.130 | 0.263 | 0.945 | -0.127 | -0.271 | 0.945 | -0.035 | -0.019 | 0.993 | -0.068 | -0.092 | 0.993 |
| LPE 20:5 | 0.191 | 0.095 | 0.376 | 0.147 | 0.122 | 0.376 | 0.343 | 0.231 | 0.185 | -0.203 | -0.166 | 0.376 | 0.127 | 0.171 | 0.376 | -0.026 | -0.030 | 0.902 | -0.045 | -0.009 | 0.902 | -0.204 | -0.130 | 0.376 |
| LPE 22:6 | 0.327 | 0.217 | 0.098 | 0.023 | 0.006 | 1.000 | -0.177 | -0.193 | 0.467 | 0.098 | 0.202 | 0.499 | 0.167 | 0.220 | 0.499 | -0.055 | -0.039 | 1.000 | 0.319 | 0.118 | 0.098 | -0.162 | -0.128 | 0.499 |
| Lysine | -0.015 | 0.006 | 1.000 | -0.076 | -0.043 | 1.000 | -0.291 | -0.203 | 0.176 | 0.030 | 0.053 | 1.000 | -0.020 | 0.028 | 1.000 | 0.000 | -0.015 | 1.000 | 0.138 | 0.049 | 0.348 | 0.000 | -0.009 | 1.000 |
| Methionine | 0.208 | 0.171 | 0.339 | -0.036 | -0.039 | 1.000 | -0.162 | -0.199 | 0.645 | 0.112 | 0.236 | 0.668 | 0.026 | 0.088 | 1.000 | -0.131 | -0.246 | 0.695 | 0.077 | 0.044 | 0.857 | -0.106 | -0.112 | 0.857 |
| Orotic acid | 0.114 | 0.022 | 0.874 | -0.122 | -0.069 | 0.745 | -0.105 | -0.061 | 0.745 | -0.057 | -0.021 | 0.968 | 0.156 | 0.084 | 0.745 | -0.116 | -0.063 | 0.864 | 0.283 | 0.042 | 0.607 | -0.068 | -0.013 | 0.968 |
| Paraxanthine | 0.030 | 0.009 | 1.000 | 0.169 | 0.053 | 0.463 | 0.235 | 0.065 | 0.309 | -0.316 | -0.128 | 0.028 | -0.013 | 0.002 | 1.000 | 0.077 | 0.026 | 1.000 | -0.032 | 0.000 | 1.000 | 0.002 | -0.004 | 1.000 |
| PC 36:4 | 0.235 | 0.176 | 0.733 | -0.010 | -0.073 | 1.000 | -0.088 | -0.190 | 0.733 | 0.026 | 0.262 | 0.733 | 0.078 | 0.056 | 1.000 | -0.222 | -0.453 | 0.733 | 0.221 | 0.080 | 0.733 | -0.084 | -0.008 | 1.000 |
| PC 38:6 | 0.297 | 0.153 | 0.172 | -0.223 | -0.306 | 0.104 | -0.243 | -0.255 | 0.172 | 0.026 | 0.115 | 0.679 | 0.091 | 0.022 | 0.983 | -0.218 | -0.275 | 0.318 | 0.395 | 0.122 | 0.086 | 0.085 | 0.156 | 0.318 |
| PC 40:7 | 0.370 | 0.260 | 0.072 | 0.007 | -0.046 | 0.866 | -0.036 | -0.086 | 0.789 | -0.067 | 0.055 | 0.866 | 0.218 | 0.322 | 0.345 | -0.310 | -0.555 | 0.115 | 0.286 | 0.089 | 0.322 | -0.158 | -0.082 | 0.789 |
| Phenylalanine | 0.165 | 0.143 | 0.729 | 0.036 | 0.062 | 0.879 | -0.030 | -0.079 | 0.879 | 0.055 | 0.209 | 0.871 | -0.046 | -0.017 | 1.000 | -0.034 | -0.060 | 0.890 | 0.026 | 0.020 | 0.879 | -0.167 | -0.177 | 0.777 |
| Proline | 0.088 | 0.124 | 0.719 | -0.097 | -0.160 | 0.719 | 0.200 | 0.338 | 0.719 | -0.097 | -0.220 | 0.719 | 0.110 | 0.359 | 0.719 | -0.012 | -0.063 | 0.910 | -0.078 | -0.034 | 0.744 | 0.098 | 0.128 | 0.719 |
| Serine | -0.002 | 0.012 | 0.995 | -0.233 | -0.256 | 0.334 | -0.162 | -0.156 | 0.520 | -0.011 | -0.054 | 0.953 | -0.036 | -0.039 | 0.983 | -0.255 | -0.438 | 0.216 | -0.075 | -0.021 | 0.951 | 0.056 | 0.033 | 0.953 |
| SM 33:1 | 0.070 | 0.045 | 0.877 | -0.349 | -0.375 | 0.042 | -0.185 | -0.195 | 0.520 | 0.054 | 0.118 | 0.877 | -0.062 | -0.074 | 0.877 | -0.164 | -0.253 | 0.563 | -0.019 | -0.006 | 1.000 | 0.270 | 0.248 | 0.112 |
| SM 34:1 | 0.028 | 0.010 | 1.000 | -0.269 | -0.203 | 0.486 | -0.010 | -0.006 | 1.000 | 0.058 | 0.072 | 0.927 | -0.014 | -0.015 | 1.000 | -0.104 | -0.107 | 0.927 | -0.109 | -0.033 | 0.927 | 0.169 | 0.110 | 0.841 |
| SM 34:2 | 0.081 | 0.043 | 0.793 | -0.361 | -0.441 | 0.026 | 0.063 | 0.094 | 0.793 | 0.046 | 0.099 | 0.793 | -0.059 | -0.127 | 0.793 | -0.237 | -0.381 | 0.263 | -0.145 | -0.080 | 0.340 | 0.219 | 0.236 | 0.217 |
| SM 35:2 | 0.095 | 0.062 | 0.886 | -0.234 | -0.377 | 0.317 | -0.071 | -0.094 | 0.886 | 0.036 | 0.106 | 0.886 | 0.016 | -0.020 | 1.000 | -0.137 | -0.256 | 0.714 | -0.120 | -0.096 | 0.439 | 0.139 | 0.209 | 0.441 |
| SM 36:2 | 0.156 | 0.055 | 0.895 | -0.297 | -0.283 | 0.116 | -0.038 | -0.021 | 1.000 | 0.068 | 0.117 | 0.895 | 0.043 | -0.006 | 1.000 | -0.209 | -0.221 | 0.781 | 0.077 | 0.000 | 1.000 | 0.077 | 0.091 | 0.895 |
| Transcinnamic acid | 0.132 | 0.142 | 0.778 | 0.014 | 0.046 | 0.953 | -0.010 | -0.064 | 0.953 | 0.080 | 0.276 | 0.799 | -0.089 | -0.072 | 0.953 | -0.048 | -0.114 | 0.953 | 0.006 | 0.023 | 0.953 | -0.163 | -0.205 | 0.778 |
| Valine | -0.074 | -0.092 | 0.679 | -0.145 | -0.239 | 0.679 | -0.047 | -0.177 | 0.679 | -0.071 | -0.015 | 1.000 | -0.103 | -0.212 | 0.679 | -0.301 | -0.673 | 0.094 | -0.022 | -0.025 | 0.884 | 0.071 | 0.132 | 0.679 |

Associations between metabolites and clinical parameters were assessed by linear models using empirical Bayes statistics for differential expression. Only metabolites that were shown to be significantly different between two occasions (as described in detail in Fig. 2) are included in the table; clinical parameters were pooled between occasions and determined at time = 0 min. Models were adjusted for age and body mass index (BMI). Corr.coef., Pearson correlation coefficient as estimated for pairwise complete observations; FC, standardised regression coefficient representing the log-fold-change (standardised beta), P, p-value as estimated by unequal variances t-test adjusted for multiple testing according to the false discovery rate method.

**Table S9B.** Assessment of associations and correlation analyses between lipids and clinical parameters.

|  | **Glucose** | | | **Insulin** | | | **GIP** | | | **GLP-1** | | | **HOMA-IR** | | | **HOMA-B** | | | **HbA1c** | | | **Matsuda** | | |
| --- | --- | --- | --- | --- | --- | --- | --- | --- | --- | --- | --- | --- | --- | --- | --- | --- | --- | --- | --- | --- | --- | --- | --- | --- |
|  | corr. | FC | P | corr. | FC | P | corr. | FC | P | corr. | FC | P | corr. | FC | P | corr. | FC | P | corr. | FC | P | corr. | FC | P |
|  | coef. |  |  | coef. |  |  | coef. |  |  | coef. |  |  | coef. |  |  | coef. |  |  | coef. |  |  | coef. |  |  |
| CE18.3 | 0.157 | 0.058 | 0.376 | 0.035 | 0.033 | 0.914 | 0.182 | 0.094 | 0.376 | 0.006 | -0.006 | 1.000 | -0.266 | -0.140 | 0.376 | 0.201 | 0.120 | 0.376 | -0.054 | 0.007 | 0.947 | -0.041 | -0.044 | 0.721 |
| LPC18.0 | 0.134 | 0.048 | 0.802 | 0.121 | 0.076 | 0.898 | 0.144 | 0.109 | 0.802 | -0.179 | -0.160 | 0.802 | 0.225 | 0.190 | 0.802 | -0.055 | -0.040 | 0.922 | -0.005 | -0.011 | 0.922 | 0.014 | 0.015 | 0.922 |
| LPC20.4 | -0.061 | -0.021 | 1.000 | -0.011 | -0.013 | 1.000 | -0.050 | -0.019 | 1.000 | 0.074 | 0.043 | 1.000 | 0.127 | 0.053 | 1.000 | -0.158 | -0.086 | 1.000 | 0.009 | -0.008 | 1.000 | -0.010 | 0.005 | 1.000 |
| PC32.0 | 0.089 | 0.037 | 0.990 | 0.046 | 0.024 | 0.990 | 0.026 | 0.048 | 0.990 | -0.137 | -0.216 | 0.662 | 0.208 | 0.273 | 0.662 | -0.110 | -0.140 | 0.990 | -0.110 | -0.103 | 0.353 | -0.080 | -0.041 | 0.990 |
| PC32.1 | 0.252 | 0.067 | 0.111 | 0.242 | 0.124 | 0.111 | 0.261 | 0.117 | 0.118 | -0.119 | -0.056 | 0.547 | 0.204 | 0.167 | 0.111 | 0.150 | 0.095 | 0.398 | -0.138 | -0.018 | 0.502 | -0.252 | -0.106 | 0.111 |
| PC32.2 | 0.189 | 0.028 | 0.269 | 0.212 | 0.057 | 0.269 | 0.230 | 0.056 | 0.269 | -0.110 | -0.034 | 0.867 | 0.176 | 0.072 | 0.269 | 0.078 | 0.022 | 0.867 | 0.029 | 0.006 | 0.867 | -0.058 | -0.016 | 0.867 |
| PC34.2 | 0.031 | 0.105 | 0.680 | 0.023 | 0.092 | 0.808 | 0.215 | 0.501 | 0.212 | -0.072 | -0.314 | 0.597 | 0.051 | 0.321 | 0.597 | -0.125 | -0.489 | 0.422 | -0.005 | 0.058 | 0.720 | 0.033 | -0.049 | 0.878 |
| PC34.3 | 0.136 | 0.033 | 0.434 | 0.238 | 0.103 | 0.338 | 0.242 | 0.102 | 0.338 | -0.166 | -0.086 | 0.426 | 0.145 | 0.094 | 0.426 | 0.150 | 0.085 | 0.434 | -0.075 | -0.009 | 0.732 | -0.129 | -0.048 | 0.434 |
| PC36.1 | 0.342 | 0.090 | 0.091 | 0.108 | 0.054 | 0.700 | 0.211 | 0.115 | 0.247 | -0.434 | -0.281 | 0.014 | 0.252 | 0.176 | 0.198 | -0.063 | -0.012 | 1.000 | 0.087 | -0.002 | 1.000 | -0.129 | -0.033 | 0.819 |
| PC36.2 | 0.210 | 0.114 | 0.236 | 0.059 | 0.053 | 0.970 | 0.230 | 0.236 | 0.206 | -0.340 | -0.427 | 0.023 | 0.178 | 0.228 | 0.373 | -0.066 | -0.084 | 0.970 | -0.029 | -0.016 | 0.970 | 0.019 | 0.014 | 1.000 |
| PC36.3 | 0.181 | 0.156 | 0.239 | 0.175 | 0.268 | 0.255 | 0.333 | 0.483 | 0.064 | -0.193 | -0.356 | 0.239 | 0.222 | 0.509 | 0.093 | 0.095 | 0.163 | 0.745 | -0.103 | -0.036 | 0.745 | -0.094 | -0.141 | 0.534 |
| PC36.4 | 0.107 | 0.078 | 0.881 | 0.110 | 0.189 | 0.881 | 0.023 | 0.069 | 1.000 | 0.012 | 0.094 | 1.000 | 0.116 | 0.142 | 0.961 | -0.206 | -0.546 | 0.724 | 0.192 | 0.081 | 0.881 | -0.186 | -0.250 | 0.881 |
| PC38.3 | 0.279 | 0.106 | 0.088 | 0.251 | 0.190 | 0.092 | 0.267 | 0.183 | 0.092 | -0.183 | -0.137 | 0.432 | 0.250 | 0.275 | 0.088 | 0.120 | 0.128 | 0.543 | -0.038 | -0.009 | 0.980 | -0.159 | -0.094 | 0.430 |
| PC38.4 | 0.235 | 0.145 | 0.390 | 0.219 | 0.331 | 0.390 | 0.128 | 0.217 | 0.451 | -0.080 | -0.038 | 1.000 | 0.233 | 0.337 | 0.390 | -0.249 | -0.467 | 0.390 | 0.148 | -0.003 | 1.000 | -0.239 | -0.215 | 0.390 |
| PC38.6 | 0.104 | 0.029 | 1.000 | -0.029 | -0.141 | 0.963 | -0.124 | -0.174 | 0.963 | -0.001 | 0.028 | 1.000 | 0.154 | 0.055 | 1.000 | -0.234 | -0.382 | 0.498 | 0.322 | 0.090 | 0.498 | -0.062 | 0.032 | 1.000 |
| PC40.6 | 0.268 | 0.104 | 0.355 | 0.081 | 0.029 | 1.000 | -0.005 | -0.013 | 1.000 | -0.129 | -0.099 | 0.903 | 0.251 | 0.191 | 0.498 | -0.233 | -0.243 | 0.369 | 0.363 | 0.072 | 0.355 | -0.154 | -0.039 | 1.000 |
| SM33.1 | 0.047 | 0.025 | 0.888 | -0.231 | -0.224 | 0.256 | -0.066 | -0.053 | 0.888 | -0.139 | -0.176 | 0.465 | 0.034 | 0.027 | 0.945 | -0.219 | -0.280 | 0.271 | -0.031 | -0.016 | 0.888 | 0.218 | 0.165 | 0.271 |
| SM34.1 | -0.012 | 0.018 | 0.949 | -0.385 | -0.572 | 0.009 | 0.115 | 0.205 | 0.386 | -0.134 | -0.325 | 0.243 | 0.032 | 0.100 | 0.796 | -0.257 | -0.573 | 0.067 | -0.227 | -0.108 | 0.201 | 0.218 | 0.226 | 0.240 |
| SM34.2 | -0.002 | -0.016 | 0.918 | -0.240 | -0.215 | 0.290 | 0.065 | 0.053 | 0.897 | -0.078 | -0.062 | 0.897 | 0.040 | 0.015 | 0.988 | -0.235 | -0.250 | 0.301 | -0.062 | -0.035 | 0.642 | 0.146 | 0.116 | 0.395 |
| SM35.1 | -0.086 | -0.015 | 0.798 | -0.149 | -0.067 | 0.367 | -0.085 | -0.018 | 0.952 | -0.109 | -0.079 | 0.367 | -0.150 | -0.105 | 0.262 | -0.040 | -0.019 | 0.953 | 0.019 | -0.003 | 0.977 | 0.140 | 0.045 | 0.442 |
| SM36.0 | -0.115 | -0.028 | 1.000 | -0.060 | -0.026 | 1.000 | -0.122 | -0.048 | 1.000 | 0.043 | 0.025 | 1.000 | -0.010 | -0.013 | 1.000 | -0.088 | -0.042 | 1.000 | 0.036 | 0.002 | 1.000 | 0.016 | 0.009 | 1.000 |
| SM36.1 | -0.079 | -0.042 | 0.844 | -0.238 | -0.221 | 0.265 | 0.020 | 0.026 | 0.959 | 0.057 | 0.056 | 0.865 | 0.055 | 0.036 | 0.959 | -0.146 | -0.166 | 0.633 | -0.134 | -0.054 | 0.480 | 0.041 | 0.037 | 0.865 |
| SM36.2 | -0.124 | -0.058 | 0.471 | -0.373 | -0.364 | 0.009 | 0.086 | 0.113 | 0.471 | -0.010 | -0.062 | 0.793 | 0.017 | -0.033 | 0.927 | -0.195 | -0.241 | 0.275 | -0.075 | -0.039 | 0.471 | 0.151 | 0.114 | 0.402 |
| SM40.1 | 0.256 | 0.164 | 0.221 | 0.109 | 0.135 | 0.604 | 0.224 | 0.237 | 0.294 | -0.182 | -0.246 | 0.346 | 0.086 | 0.202 | 0.541 | -0.024 | -0.062 | 0.811 | 0.002 | 0.019 | 0.788 | -0.028 | -0.054 | 0.788 |
| SM41.1 | 0.165 | 0.071 | 0.490 | 0.088 | 0.071 | 0.928 | 0.198 | 0.142 | 0.490 | -0.158 | -0.144 | 0.490 | 0.009 | 0.041 | 1.000 | 0.011 | -0.002 | 1.000 | -0.037 | -0.001 | 1.000 | 0.032 | 0.005 | 1.000 |
| SM42.2 | -0.020 | -0.005 | 1.000 | -0.149 | -0.298 | 0.436 | 0.037 | 0.133 | 0.786 | -0.015 | -0.140 | 0.786 | 0.114 | 0.168 | 0.786 | -0.126 | -0.288 | 0.572 | -0.109 | -0.096 | 0.436 | 0.119 | 0.167 | 0.572 |
| SM42.3 | -0.195 | -0.099 | 0.266 | -0.352 | -0.332 | 0.017 | -0.087 | -0.054 | 0.712 | 0.116 | 0.099 | 0.585 | 0.029 | -0.030 | 0.894 | -0.191 | -0.210 | 0.279 | -0.087 | -0.048 | 0.304 | 0.243 | 0.185 | 0.147 |
| SM43.2 | 0.033 | 0.010 | 0.785 | -0.169 | -0.061 | 0.541 | -0.119 | -0.037 | 0.633 | 0.079 | 0.024 | 0.785 | 0.126 | 0.059 | 0.541 | -0.135 | -0.068 | 0.541 | 0.126 | 0.016 | 0.541 | 0.177 | 0.047 | 0.541 |
| TG48.1 | 0.374 | 0.068 | 0.021 | 0.357 | 0.129 | 0.021 | 0.312 | 0.108 | 0.044 | -0.322 | -0.127 | 0.046 | 0.260 | 0.121 | 0.077 | 0.032 | 0.028 | 0.884 | 0.122 | 0.011 | 0.741 | -0.297 | -0.078 | 0.060 |
| TG48.2 | 0.281 | 0.052 | 0.089 | 0.352 | 0.137 | 0.029 | 0.318 | 0.120 | 0.043 | -0.229 | -0.091 | 0.233 | 0.315 | 0.162 | 0.042 | 0.046 | 0.040 | 0.665 | 0.083 | 0.005 | 0.841 | -0.272 | -0.077 | 0.089 |
| TG50.0 | 0.355 | 0.060 | 0.025 | 0.433 | 0.149 | 0.003 | 0.264 | 0.089 | 0.086 | -0.159 | -0.050 | 0.575 | 0.303 | 0.131 | 0.042 | 0.033 | 0.033 | 0.786 | 0.251 | 0.024 | 0.194 | -0.420 | -0.108 | 0.004 |
| TG50.1 | 0.355 | 0.177 | 0.029 | 0.391 | 0.404 | 0.012 | 0.283 | 0.290 | 0.059 | -0.191 | -0.189 | 0.438 | 0.246 | 0.303 | 0.169 | -0.012 | 0.038 | 0.939 | 0.155 | 0.032 | 0.753 | -0.383 | -0.288 | 0.013 |
| TG50.4 | 0.201 | 0.029 | 0.319 | 0.318 | 0.097 | 0.033 | 0.303 | 0.084 | 0.064 | -0.208 | -0.061 | 0.334 | 0.267 | 0.117 | 0.048 | 0.066 | 0.031 | 0.790 | -0.036 | -0.004 | 1.000 | -0.243 | -0.056 | 0.125 |
| TG52.2 | 0.089 | 0.048 | 0.878 | 0.098 | 0.132 | 0.766 | 0.133 | 0.295 | 0.434 | -0.037 | -0.063 | 0.953 | 0.310 | 0.654 | 0.258 | -0.165 | -0.344 | 0.536 | 0.277 | 0.126 | 0.351 | -0.194 | -0.240 | 0.434 |
| TG52.3 | 0.047 | 0.010 | 1.000 | 0.103 | 0.135 | 0.748 | 0.106 | 0.201 | 0.674 | -0.029 | -0.041 | 1.000 | 0.239 | 0.443 | 0.619 | -0.150 | -0.283 | 0.674 | 0.233 | 0.096 | 0.619 | -0.155 | -0.169 | 0.674 |
| TG54.3 | -0.069 | -0.088 | 0.452 | -0.096 | -0.194 | 0.437 | 0.231 | 0.374 | 0.194 | -0.137 | -0.255 | 0.437 | 0.207 | 0.250 | 0.437 | -0.142 | -0.205 | 0.487 | -0.067 | -0.095 | 0.371 | -0.035 | 0.013 | 1.000 |
| TG54.4 | -0.041 | -0.049 | 0.869 | -0.031 | -0.067 | 0.895 | 0.234 | 0.323 | 0.447 | -0.162 | -0.259 | 0.505 | 0.184 | 0.253 | 0.505 | -0.157 | -0.244 | 0.505 | -0.061 | -0.059 | 0.505 | -0.040 | -0.014 | 0.989 |
| TG56.6 | 0.131 | 0.027 | 1.000 | 0.045 | 0.017 | 1.000 | 0.039 | 0.017 | 1.000 | -0.070 | -0.008 | 1.000 | 0.237 | 0.214 | 1.000 | -0.156 | -0.131 | 1.000 | 0.157 | 0.016 | 1.000 | -0.183 | -0.082 | 1.000 |

Associations between metabolites and clinical parameters were assessed by linear models using empirical Bayes statistics for differential expression. Only metabolites that were shown to be significantly different between two occasions (as described in detail in Fig. 2) are included in the table; clinical parameters were pooled between occasions and determined at time = 0 min. Models were adjusted for age and body mass index (BMI). Corr.coef., Pearson correlation coefficient as estimated for pairwise complete observations; FC, standardised regression coefficient representing the log-fold-change (standardised beta), P, p-value as estimated by unequal variances t-test adjusted for multiple testing according to the false discovery rate method.

**Table 10A.** Linear-mixed-effect models fitted to metabolomics data between study occasions (mixed-meal test).

|  | **Model 1**  **(adjusted for age)** | | | | **Model 2**  **(adj. for age and weight loss)** | | | | **Model 3**  **(adj. for age and insulin)** | | | | **Direction (Mean, SD)** | | | |
| --- | --- | --- | --- | --- | --- | --- | --- | --- | --- | --- | --- | --- | --- | --- | --- | --- |
|  | Effect VLCD | RYGB (1d) | RYGB (6w) | Cum.  effect | Effect VLCD | RYGB (1d) | RYGB (6w) | Cum.  effect | Effect VLCD | RYGB (1d) | RYGB (6w) | Cum.  effect | Effect  of VLCD | RYGB  (1d) | RYGB (6w) | Cum. effect |
| **1-Methyl-adenosine** | 0.607 | 0.995 | 0.876 | 0.986 | 0.768 | 0.993 | 0.899 | 0.988 | 0.605 | 0.999 | 0.960 | 0.952 | -19.35 ± 41.64 | 14.84 ± 47.47 | 11.7 ± 30.75 | -4.96 ± 32.08 |
| **1-Methyl-histidine** | 0.349 | 0.089 | 0.308 | 1.000 | 0.726 | 0.422 | 0.315 | 1.000 | 0.353 | 0.113 | 0.395 | 1.000 | 21.92 ± 125.05 | -28.14 ± 139.81 | -20.7 ± 130.64 | -0.73 ± 23.49 |
| **2-Hydroxy-cinnamic acid** | 0.028 | 0.953 | 0.138 | 0.960 | 0.092 | 1.000 | 0.201 | 0.882 | 0.029 | 1.000 | 0.029 | 1.000 | -14.74 ± 33.92 | 1.58 ± 34.74 | 26.08 ± 27.31 | 7.31 ± 33.53 |
| **3-Hydroxy-butyrate** | 0.394 | 0.455 | 1.000 | 0.288 | 0.086 | 1.000 | 0.972 | 0.066 | 0.414 | 0.600 | 1.000 | 0.519 | -44.88 ± 68.61 | -0.22 ± 101.16 | 15.68 ± 64.9 | -32.66 ± 30.22 |
| **5-Oxoproline** | 0.999 | 0.058 | 0.761 | 0.876 | 1.000 | 0.500 | 0.714 | 0.860 | 0.999 | 0.079 | 0.837 | 0.927 | 2.43 ± 67.23 | -19.68 ± 91.71 | -15.79 ± 65.55 | -13.26 ± 39.63 |
| **Acetylalanine** | 0.874 | 0.966 | 0.946 | 0.999 | 0.281 | 0.896 | 0.997 | 0.508 | 0.880 | 0.995 | 0.820 | 1.000 | -30.57 ± 101.31 | 16.16 ± 111.51 | 37.48 ± 88.79 | -2.25 ± 57.33 |
| **Alanine** | 0.866 | 0.042 | 0.744 | 0.999 | 0.953 | 0.258 | 0.759 | 1.000 | 0.862 | 0.079 | 0.908 | 1.000 | 10.84 ± 104.26 | -35.62 ± 139.83 | -7.82 ± 116.05 | -1.13 ± 47.32 |
| **Arginine** | 0.170 | 0.065 | 0.260 | 0.999 | 0.607 | 0.422 | 0.256 | 1.000 | 0.175 | 0.078 | 0.317 | 1.000 | 23.48 ± 107.48 | -27.43 ± 107.94 | -16.87 ± 106.75 | 1.39 ± 36.42 |
| **Asparagine** | 0.514 | 0.052 | 0.446 | 1.000 | 0.826 | 0.329 | 0.455 | 1.000 | 0.512 | 0.083 | 0.623 | 1.000 | 21.14 ± 102.77 | -35.26 ± 112.69 | -15.41 ± 107.22 | 2.62 ± 29.06 |
| **Aspartic acid** | 0.772 | 0.863 | 0.565 | 0.996 | 0.549 | 0.629 | 0.702 | 0.979 | 0.779 | 0.734 | 0.361 | 0.936 | -38.57 ± 183.21 | 23.47 ± 156.18 | 24.75 ± 164.55 | -18.44 ± 102.77 |
| **Caffeine** | 0.878 | 0.001 | 0.654 | 0.992 | 0.952 | 0.042 | 0.681 | 1.000 | 0.879 | 0.002 | 0.789 | 0.999 | -14.07 ± 56.08 | 105.53 ± 105.03 | 43.27 ± 112.89 | 29.46 ± 115.39 |
| **Carnitine** | 0.825 | 0.427 | 0.972 | 0.990 | 0.982 | 0.844 | 0.963 | 1.000 | 0.825 | 0.505 | 0.991 | 0.978 | -2.29 ± 17.97 | 5.85 ± 19.06 | 0.3 ± 14.11 | -1.84 ± 16.37 |
| **Carnitine C10:0** | 0.000 | 0.004 | 0.983 | 0.002 | 0.017 | 0.073 | 0.988 | 0.086 | 0.000 | 0.001 | 0.712 | 0.028 | -40.01 ± 75.48 | 60.16 ± 47.93 | -7.98 ± 51.1 | -52.78 ± 56.51 |
| **Carnitine C10:1** | 0.000 | 0.000 | 0.766 | 0.001 | 0.003 | 0.016 | 0.818 | 0.056 | 0.000 | 0.000 | 0.448 | 0.016 | -38.34 ± 64.25 | 55.09 ± 38.02 | -0.69 ± 44.2 | -42.25 ± 42.85 |
| **Carnitine C10:2** | 0.005 | 0.366 | 0.998 | 0.002 | 0.109 | 0.720 | 0.999 | 0.129 | 0.004 | 0.185 | 0.996 | 0.022 | -24.98 ± 47.79 | 27.15 ± 35.91 | -5.83 ± 34.57 | -32.42 ± 39.57 |
| **Carnitine C12:0** | 0.001 | 0.092 | 0.972 | 0.006 | 0.048 | 0.401 | 0.973 | 0.203 | 0.001 | 0.037 | 0.723 | 0.078 | -35.79 ± 71.84 | 44.59 ± 50.52 | -1.56 ± 41.57 | -45.17 ± 46.96 |
| **Carnitine C12:1** | 0.000 | 0.017 | 0.874 | 0.001 | 0.009 | 0.186 | 0.884 | 0.102 | 0.000 | 0.006 | 0.572 | 0.018 | -44.4 ± 66.2 | 45.32 ± 56.23 | 1.16 ± 45.27 | -47.39 ± 48.51 |
| **Carnitine C14:0** | 0.003 | 0.858 | 0.880 | 0.047 | 0.064 | 0.932 | 0.897 | 0.332 | 0.002 | 0.612 | 0.517 | 0.253 | -29.44 ± 53 | 20.4 ± 46.87 | 7.86 ± 32.83 | -26.85 ± 41.62 |
| **Carnitine C14:1** | 0.000 | 0.072 | 0.985 | 0.003 | 0.025 | 0.297 | 0.989 | 0.110 | 0.001 | 0.033 | 0.813 | 0.035 | -36.3 ± 57.51 | 40.59 ± 48.82 | -0.33 ± 33.92 | -42.14 ± 40.97 |
| **Carnitine C14:2** | 0.000 | 0.020 | 0.770 | 0.008 | 0.006 | 0.082 | 0.852 | 0.085 | 0.000 | 0.010 | 0.495 | 0.075 | -37.7 ± 59.04 | 45.69 ± 51.84 | -0.72 ± 39.13 | -42.46 ± 37.06 |
| **Carnitine C16:0** | 0.004 | 1.000 | 0.645 | 0.143 | 0.092 | 1.000 | 0.652 | 0.592 | 0.004 | 0.997 | 0.367 | 0.423 | -24.53 ± 45.45 | 6.47 ± 44.58 | 12.74 ± 33.24 | -16.64 ± 35.61 |
| **Carnitine C18:0** | 0.005 | 0.981 | 0.908 | 0.059 | 0.195 | 1.000 | 0.877 | 0.627 | 0.004 | 0.870 | 0.597 | 0.271 | -22 ± 41.03 | 7.65 ± 40.51 | 5.78 ± 35.61 | -21.14 ± 32.27 |
| **Carnitine C18:1** | 0.001 | 0.973 | 0.589 | 0.090 | 0.023 | 0.947 | 0.660 | 0.303 | 0.001 | 0.843 | 0.264 | 0.365 | -27.26 ± 46.39 | 11.35 ± 41.58 | 12.24 ± 34.09 | -20.26 ± 38.31 |
| **Carnitine C18:2** | 0.001 | 0.997 | 0.273 | 0.265 | 0.059 | 1.000 | 0.284 | 0.730 | 0.001 | 0.945 | 0.106 | 0.687 | -25.2 ± 41.31 | 5.33 ± 38.82 | 13.73 ± 38.34 | -14.98 ± 35.06 |
| **Carnitine C2:0** | 0.223 | 0.491 | 0.979 | 0.509 | 0.311 | 0.951 | 0.993 | 0.574 | 0.228 | 0.653 | 0.897 | 0.776 | 8.13 ± 22.92 | 11.48 ± 33.85 | -0.56 ± 18.36 | 7.46 ± 16.32 |
| **Carnitine C3:0** | 0.000 | 0.033 | 0.024 | 0.592 | 0.006 | 0.108 | 0.038 | 0.650 | 0.000 | 0.013 | 0.007 | 0.911 | -19.36 ± 24.05 | 20.26 ± 22.47 | 16.18 ± 22.94 | -0.42 ± 23.53 |
| **Carnitine C4:0** | 0.001 | 0.502 | 0.412 | 0.169 | 0.038 | 0.719 | 0.449 | 0.517 | 0.001 | 0.432 | 0.331 | 0.326 | -25.56 ± 46.31 | 30.93 ± 41.84 | 13.2 ± 33.68 | -11.57 ± 40.18 |
| **Carnitine C5:0** | 0.120 | 0.998 | 0.183 | 0.999 | 0.165 | 0.995 | 0.262 | 0.938 | 0.122 | 1.000 | 0.105 | 1.000 | -21.55 ± 45.04 | 3.87 ± 42.31 | 33.7 ± 39.02 | 5.56 ± 40.87 |
| **Carnitine C6:0** | 0.000 | 0.000 | 0.342 | 0.017 | 0.005 | 0.023 | 0.388 | 0.219 | 0.000 | 0.000 | 0.135 | 0.147 | -37.11 ± 52.88 | 49.23 ± 40.96 | 13.21 ± 35.9 | -25.73 ± 43.14 |
| **Carnitine C8:0** | 0.000 | 0.001 | 0.880 | 0.002 | 0.008 | 0.038 | 0.900 | 0.090 | 0.000 | 0.000 | 0.532 | 0.027 | -36.81 ± 71.1 | 54.41 ± 41.75 | -2.77 ± 50.55 | -41.11 ± 49.67 |
| **Carnitine C8:1** | 0.004 | 0.681 | 0.646 | 0.159 | 0.134 | 0.942 | 0.628 | 0.704 | 0.004 | 0.544 | 0.454 | 0.380 | -27.95 ± 33.17 | 16.94 ± 41.45 | 15.59 ± 31.56 | -12.32 ± 36.22 |
| **Citric acid** | 0.448 | 1.000 | 0.664 | 0.996 | 0.383 | 0.964 | 0.777 | 0.891 | 0.456 | 0.985 | 0.287 | 0.994 | -45.66 ± 134.59 | 14.58 ± 146.88 | 59.28 ± 121.84 | -0.66 ± 90.57 |
| **Creatine** | 0.570 | 0.068 | 0.909 | 0.964 | 0.834 | 0.345 | 0.914 | 0.994 | 0.568 | 0.102 | 0.966 | 0.931 | 17.44 ± 109.46 | -28.98 ± 124.9 | -1.53 ± 116.34 | 18.89 ± 41.92 |
| **Cystine** | 0.163 | 0.009 | 0.128 | 1.000 | 0.402 | 0.096 | 0.153 | 1.000 | 0.166 | 0.016 | 0.211 | 1.000 | 34.36 ± 115.57 | -46.51 ± 142.08 | -35.62 ± 119.98 | -6.39 ± 38.52 |
| **Dihydroorotic acid** | 0.998 | 0.626 | 0.884 | 0.968 | 1.000 | 0.965 | 0.847 | 0.933 | 0.998 | 0.612 | 0.866 | 0.956 | 2.66 ± 155.46 | -4.22 ± 114.71 | 18.07 ± 115.33 | 17.91 ± 103.63 |
| **Gluconic acid** | 0.742 | 0.339 | 0.536 | 0.997 | 0.875 | 0.615 | 0.568 | 1.000 | 0.735 | 0.480 | 0.774 | 1.000 | 16.37 ± 82.11 | -19.68 ± 107.26 | -9.77 ± 96.08 | 5.19 ± 43.7 |
| **Glucosamine-6-phosphate** | 0.146 | 0.041 | 0.284 | 0.996 | 0.658 | 0.424 | 0.258 | 1.000 | 0.147 | 0.070 | 0.457 | 0.977 | 33.36 ± 160.6 | -24.57 ± 179.32 | -25.35 ± 167.4 | 11.26 ± 57.24 |
| **Glutamic acid** | 0.992 | 0.306 | 0.792 | 0.955 | 0.998 | 0.651 | 0.800 | 0.990 | 0.992 | 0.407 | 0.913 | 0.992 | -4.19 ± 113.03 | -28.91 ± 140.47 | -6.45 ± 114.07 | -6.72 ± 68.42 |
| **Glutamine** | 0.420 | 0.026 | 0.321 | 1.000 | 0.764 | 0.240 | 0.332 | 1.000 | 0.419 | 0.042 | 0.467 | 1.000 | 25.72 ± 128.32 | -42.4 ± 144.49 | -27.77 ± 134.23 | -4.55 ± 26.09 |
| **Glyceric acid** | 0.852 | 1.000 | 0.896 | 1.000 | 0.312 | 0.760 | 0.983 | 0.618 | 0.858 | 1.000 | 0.836 | 1.000 | -29.74 ± 76.2 | 26.72 ± 99.97 | 32.43 ± 70.33 | -3.27 ± 50.81 |
| **Hippuric acid** | 0.583 | 0.959 | 0.997 | 0.773 | 0.893 | 0.997 | 0.996 | 0.976 | 0.586 | 0.976 | 1.000 | 0.744 | -10.98 ± 53.46 | 18.4 ± 59.35 | 7.44 ± 51.27 | -10.03 ± 37.91 |
| **Histidine** | 0.138 | 0.038 | 0.317 | 0.989 | 0.488 | 0.280 | 0.327 | 0.999 | 0.140 | 0.049 | 0.392 | 0.989 | 31.92 ± 119.7 | -35.08 ± 126.67 | -21.01 ± 118.99 | 7.17 ± 25.96 |
| **Hydroxyproline** | 0.181 | 0.806 | 0.951 | 0.532 | 0.460 | 0.960 | 0.960 | 0.810 | 0.180 | 0.939 | 0.763 | 0.860 | -41.13 ± 104.67 | -15.43 ± 100.15 | 2.36 ± 84.16 | -29.29 ± 82.12 |
| **Hypoxanthine** | 0.381 | 0.849 | 0.471 | 1.000 | 0.262 | 1.000 | 0.623 | 0.870 | 0.385 | 0.945 | 0.307 | 0.999 | -18.36 ± 99.47 | -23.71 ± 66.81 | 10.94 ± 138.99 | -3.34 ± 118.6 |
| **Indole** | 0.132 | 0.988 | 0.590 | 0.866 | 0.452 | 0.996 | 0.604 | 0.973 | 0.127 | 1.000 | 0.279 | 0.998 | -16.27 ± 41.16 | 5.43 ± 44.61 | 17.45 ± 37.22 | 0.7 ± 38.66 |
| **Kynurenine** | 0.158 | 0.987 | 0.964 | 0.454 | 0.289 | 1.000 | 0.982 | 0.594 | 0.151 | 1.000 | 0.701 | 0.867 | -16.41 ± 37.16 | -1.35 ± 34.35 | 6.43 ± 30.5 | -15.02 ± 30.89 |
| **Lactic acid** | 0.996 | 0.997 | 0.991 | 1.000 | 0.716 | 0.938 | 1.000 | 0.835 | 0.997 | 1.000 | 0.930 | 0.990 | -16.08 ± 79.42 | 21.02 ± 91.73 | 29.74 ± 72.76 | 6.98 ± 33.31 |
| **Leucine-Isoleucine** | 0.077 | 0.945 | 0.952 | 0.305 | 0.565 | 1.000 | 0.928 | 0.910 | 0.083 | 0.924 | 0.925 | 0.462 | -7.76 ± 28.57 | 1.79 ± 32.25 | 2.07 ± 23.35 | -8.6 ± 20.74 |
| **LPC 14:0** | 0.016 | 0.999 | 0.671 | 0.320 | 0.218 | 0.998 | 0.662 | 0.810 | 0.016 | 1.000 | 0.434 | 0.641 | -21.96 ± 38.26 | 7.5 ± 41.69 | 14 ± 32.79 | -9.1 ± 35.35 |
| **LPC 15:0** | 0.024 | 0.998 | 0.696 | 0.365 | 0.321 | 0.987 | 0.662 | 0.900 | 0.023 | 1.000 | 0.456 | 0.693 | -21.45 ± 39.78 | 3.58 ± 46.35 | 13.42 ± 35.66 | -9.29 ± 34.89 |
| **LPC 16:0** | 0.013 | 1.000 | 0.433 | 0.497 | 0.139 | 1.000 | 0.460 | 0.810 | 0.014 | 0.999 | 0.278 | 0.777 | -11.47 ± 18.29 | 2.62 ± 22.65 | 8.32 ± 15.53 | -4.67 ± 15.58 |
| **LPC 16:1** | 0.019 | 1.000 | 0.655 | 0.365 | 0.280 | 0.998 | 0.627 | 0.885 | 0.019 | 0.999 | 0.410 | 0.699 | -23.17 ± 47.62 | 5.58 ± 46.27 | 13.83 ± 37.49 | -13.61 ± 42.73 |
| **LPC 17:0** | 0.092 | 0.996 | 0.670 | 0.713 | 0.506 | 0.988 | 0.645 | 0.979 | 0.088 | 1.000 | 0.330 | 0.977 | -21.81 ± 41.95 | 5.07 ± 48.06 | 14.7 ± 38.81 | -10.48 ± 39.15 |
| **LPC 18:0** | 0.056 | 0.987 | 0.738 | 0.512 | 0.600 | 0.901 | 0.657 | 0.992 | 0.053 | 1.000 | 0.412 | 0.881 | -20.36 ± 41.57 | 2.72 ± 45.94 | 11.34 ± 33.94 | -10.02 ± 39.45 |
| **LPC 18:1** | 0.024 | 1.000 | 0.826 | 0.255 | 0.236 | 1.000 | 0.824 | 0.730 | 0.025 | 0.994 | 0.683 | 0.482 | -21.63 ± 40.84 | 5.78 ± 44.75 | 10.91 ± 31.71 | -14.51 ± 35.11 |
| **LPC 18:2** | 0.039 | 1.000 | 0.771 | 0.393 | 0.387 | 0.999 | 0.739 | 0.911 | 0.041 | 1.000 | 0.635 | 0.631 | -22.46 ± 42.04 | 6.57 ± 52.35 | 10.61 ± 37.32 | -14.9 ± 38.52 |
| **LPC 19:0** | 0.189 | 1.000 | 0.673 | 0.889 | 0.569 | 1.000 | 0.680 | 0.984 | 0.189 | 1.000 | 0.563 | 0.974 | -20.75 ± 68.37 | -0.5 ± 56.01 | 10.73 ± 77.56 | -11.34 ± 56.09 |
| **LPC 20:1** | 0.218 | 1.000 | 0.980 | 0.501 | 0.669 | 1.000 | 0.973 | 0.919 | 0.224 | 0.998 | 0.863 | 0.817 | -10.17 ± 29.13 | -2.42 ± 43.33 | 4.1 ± 25.81 | -6.33 ± 29.81 |
| **LPC 20:2** | 0.709 | 0.884 | 0.869 | 0.998 | 0.914 | 0.973 | 0.872 | 1.000 | 0.717 | 0.858 | 0.836 | 1.000 | -9.16 ± 33.98 | 1.88 ± 37.15 | 4.9 ± 40.68 | -10.45 ± 39.36 |
| **LPC 20:3** | 0.044 | 1.000 | 0.931 | 0.237 | 0.254 | 1.000 | 0.939 | 0.639 | 0.046 | 0.999 | 0.811 | 0.473 | -30.45 ± 60.31 | 8.95 ± 61.91 | 11.91 ± 48.52 | -21.84 ± 61.52 |
| **LPC 20:4** | 0.053 | 1.000 | 0.894 | 0.319 | 0.245 | 0.999 | 0.911 | 0.662 | 0.054 | 0.992 | 0.749 | 0.582 | -29.01 ± 55.15 | 10.34 ± 61.1 | 13.28 ± 46.65 | -19.24 ± 54.94 |
| **LPC 20:5** | 0.066 | 0.999 | 0.908 | 0.347 | 0.346 | 0.999 | 0.909 | 0.775 | 0.067 | 1.000 | 0.759 | 0.624 | -25.65 ± 54.63 | 5.07 ± 55.82 | 13.01 ± 42.35 | -15.56 ± 52.57 |
| **LPC 22:5** | 0.075 | 0.999 | 0.841 | 0.469 | 0.400 | 1.000 | 0.836 | 0.874 | 0.079 | 0.995 | 0.768 | 0.651 | -29.5 ± 55.66 | 7.88 ± 63.48 | 12.7 ± 48.4 | -17.81 ± 55.46 |
| **LPC 22:6** | 0.116 | 1.000 | 0.955 | 0.393 | 0.379 | 1.000 | 0.962 | 0.737 | 0.120 | 1.000 | 0.867 | 0.639 | -29.3 ± 53.84 | 9.31 ± 62.67 | 12.55 ± 48.49 | -17.77 ± 59.51 |
| **LPE 16:0** | 0.040 | 0.931 | 0.858 | 0.306 | 0.506 | 1.000 | 0.799 | 0.945 | 0.042 | 0.928 | 0.859 | 0.394 | -19.25 ± 35.38 | 5.32 ± 45.93 | 9.51 ± 33.65 | -13.17 ± 34.69 |
| **LPE 18:0** | 0.023 | 0.999 | 0.694 | 0.359 | 0.311 | 0.991 | 0.661 | 0.894 | 0.022 | 1.000 | 0.448 | 0.691 | -21.57 ± 39.62 | 3.78 ± 46.1 | 13.23 ± 35.38 | -9.5 ± 34.66 |
| **LPE 18:1** | 0.026 | 0.840 | 0.999 | 0.052 | 0.566 | 0.623 | 0.989 | 0.825 | 0.026 | 0.940 | 0.965 | 0.170 | -12.06 ± 34.01 | -4.52 ± 32.27 | 0.87 ± 24.38 | -15.15 ± 30.08 |
| **LPE 18:2** | 0.052 | 0.757 | 0.946 | 0.241 | 0.563 | 0.677 | 0.906 | 0.924 | 0.053 | 0.890 | 0.807 | 0.511 | -12.96 ± 35.73 | -6.01 ± 41.57 | 5.61 ± 28.03 | -9.7 ± 32.04 |
| **LPE 20:0** | 0.092 | 0.991 | 0.826 | 0.543 | 0.587 | 0.960 | 0.783 | 0.974 | 0.089 | 1.000 | 0.500 | 0.903 | -19.13 ± 40.59 | 1.93 ± 42.8 | 12.71 ± 33.6 | -9.64 ± 39.43 |
| **LPE 20:4** | 0.034 | 0.982 | 0.906 | 0.226 | 0.597 | 0.827 | 0.828 | 0.966 | 0.036 | 0.995 | 0.837 | 0.389 | -16.17 ± 31.2 | -3.91 ± 40.48 | 3.95 ± 26.31 | -12.24 ± 27.6 |
| **LPE 20:5** | 0.170 | 0.888 | 0.996 | 0.317 | 0.840 | 0.720 | 0.982 | 0.976 | 0.175 | 0.971 | 0.933 | 0.634 | -14.63 ± 39.79 | -6.54 ± 43.86 | 3.14 ± 30.25 | -12.92 ± 35.89 |
| **LPE 22:6** | 0.020 | 0.996 | 0.960 | 0.108 | 0.457 | 0.918 | 0.918 | 0.856 | 0.022 | 1.000 | 0.900 | 0.231 | -17.96 ± 33.81 | -3.53 ± 41.67 | 2.82 ± 26.38 | -17.28 ± 30.82 |
| **Lysine** | 0.302 | 0.037 | 0.531 | 0.993 | 0.817 | 0.407 | 0.490 | 1.000 | 0.304 | 0.057 | 0.676 | 0.980 | 23.9 ± 114.77 | -36.82 ± 126.63 | -12.06 ± 117.55 | 8.25 ± 36.95 |
| **Malic acid** | 0.589 | 0.967 | 0.714 | 1.000 | 0.423 | 0.999 | 0.831 | 0.890 | 0.596 | 0.995 | 0.528 | 1.000 | -36.42 ± 121.83 | 3.65 ± 114.48 | 40.17 ± 91.93 | -10.54 ± 71.63 |
| **Methionine** | 0.010 | 0.996 | 0.141 | 0.829 | 0.033 | 0.995 | 0.225 | 0.664 | 0.010 | 1.000 | 0.040 | 0.997 | -18.16 ± 36.89 | 0.14 ± 33.41 | 26.53 ± 26.9 | 4.42 ± 28.59 |
| **Mevalonic acid** | 0.824 | 0.859 | 0.905 | 1.000 | 0.426 | 0.998 | 0.977 | 0.748 | 0.831 | 0.926 | 0.824 | 1.000 | -20.92 ± 74.86 | 1.98 ± 79.1 | 26.36 ± 62.97 | -3.92 ± 48.81 |
| **Orotic acid** | 0.988 | 0.069 | 0.536 | 0.811 | 1.000 | 0.568 | 0.477 | 0.782 | 0.987 | 0.126 | 0.778 | 0.958 | 0.04 ± 56.82 | -12.57 ± 72.36 | -7.09 ± 63.49 | -8.15 ± 29.18 |
| **Paraxanthine** | 0.757 | 0.034 | 0.121 | 0.706 | 0.269 | 0.015 | 0.247 | 0.984 | 0.761 | 0.045 | 0.176 | 0.769 | -28.92 ± 67.16 | 120.04 ± 115.34 | 107.39 ± 121.33 | 79.79 ± 114.31 |
| **PC 32:1** | 0.001 | 0.999 | 0.753 | 0.045 | 0.139 | 0.998 | 0.684 | 0.677 | 0.001 | 0.982 | 0.515 | 0.172 | -22.12 ± 38.34 | 5.26 ± 38.66 | 10.6 ± 28.84 | -15.44 ± 36.9 |
| **PC 34:1** | 0.001 | 1.000 | 0.883 | 0.022 | 0.119 | 0.993 | 0.839 | 0.524 | 0.001 | 0.996 | 0.570 | 0.134 | -20.11 ± 39.17 | 2.8 ± 35.01 | 9.58 ± 26.22 | -15.29 ± 38.29 |
| **PC 34:2** | 0.010 | 1.000 | 0.896 | 0.102 | 0.301 | 0.996 | 0.848 | 0.784 | 0.007 | 0.947 | 0.399 | 0.514 | -15.29 ± 32.05 | 4.5 ± 25.15 | 8.73 ± 22.26 | -9.53 ± 32.21 |
| **PC 36:2** | 0.001 | 0.991 | 0.804 | 0.030 | 0.142 | 0.914 | 0.729 | 0.653 | 0.001 | 1.000 | 0.427 | 0.183 | -19.65 ± 38.42 | 0.8 ± 34.26 | 10.15 ± 27.13 | -13.17 ± 36.19 |
| **PC 36:3** | 0.002 | 0.994 | 0.990 | 0.010 | 0.178 | 0.943 | 0.975 | 0.463 | 0.002 | 1.000 | 0.810 | 0.081 | -14.14 ± 30.66 | 0.63 ± 26.01 | 6 ± 21.76 | -11.12 ± 30.39 |
| **PC 36:4** | 0.003 | 1.000 | 0.880 | 0.047 | 0.257 | 0.980 | 0.805 | 0.768 | 0.003 | 0.990 | 0.594 | 0.212 | -12.41 ± 29.13 | 2.95 ± 21.97 | 7.65 ± 19.58 | -8.19 ± 25.64 |
| **PC 38:5** | 0.002 | 0.994 | 0.812 | 0.054 | 0.306 | 0.816 | 0.691 | 0.878 | 0.002 | 1.000 | 0.562 | 0.206 | -17.28 ± 33.62 | 2.25 ± 33.49 | 11.56 ± 27.89 | -8.96 ± 33.23 |
| **PC 38:6** | 0.016 | 1.000 | 0.753 | 0.251 | 0.278 | 0.994 | 0.718 | 0.841 | 0.016 | 1.000 | 0.463 | 0.599 | -20.75 ± 46.17 | 3.4 ± 43.16 | 12.61 ± 30.49 | -12.6 ± 44.7 |
| **PC 40:7** | 0.001 | 1.000 | 0.903 | 0.013 | 0.093 | 0.995 | 0.866 | 0.440 | 0.001 | 0.993 | 0.565 | 0.102 | -20.55 ± 35.37 | 2.97 ± 33.83 | 8.92 ± 26.77 | -15.57 ± 34.85 |
| **PC 40:8** | 0.998 | 0.998 | 0.914 | 0.982 | 0.999 | 1.000 | 0.922 | 0.998 | 0.998 | 1.000 | 0.775 | 0.901 | -4.16 ± 25.67 | -11.14 ± 41.15 | 8.76 ± 30.48 | -3.61 ± 39.48 |
| **Phenylalanine** | 0.025 | 0.999 | 0.182 | 0.909 | 0.090 | 0.999 | 0.244 | 0.850 | 0.022 | 0.999 | 0.037 | 1.000 | -15.31 ± 36.87 | -3.36 ± 34.33 | 23.42 ± 31.55 | 4.83 ± 32.02 |
| **Proline** | 0.291 | 0.243 | 0.308 | 1.000 | 0.325 | 0.289 | 0.416 | 0.970 | 0.326 | 0.183 | 0.203 | 0.995 | -3.88 ± 16.65 | 3.7 ± 20.53 | 4.55 ± 17.37 | 0.48 ± 9.96 |
| **Serine** | 0.820 | 0.942 | 0.801 | 1.000 | 0.455 | 0.993 | 0.919 | 0.853 | 0.825 | 0.993 | 0.547 | 0.982 | -29.59 ± 80.36 | 12.65 ± 77.85 | 39.24 ± 66.2 | 1.48 ± 56.12 |
| **SM 32:1** | 0.036 | 0.975 | 0.849 | 0.298 | 0.634 | 0.787 | 0.748 | 0.988 | 0.034 | 1.000 | 0.543 | 0.684 | -21.32 ± 51.17 | 4.51 ± 47.44 | 14.67 ± 34.22 | -10.77 ± 50.93 |
| **SM 32:2** | 0.049 | 0.979 | 0.858 | 0.348 | 0.612 | 0.856 | 0.780 | 0.980 | 0.047 | 1.000 | 0.558 | 0.738 | -21.15 ± 43.56 | 5.02 ± 41.53 | 8.43 ± 32.8 | -14.43 ± 42.07 |
| **SM 33:1** | 0.015 | 0.966 | 0.826 | 0.186 | 0.500 | 0.764 | 0.719 | 0.964 | 0.015 | 0.998 | 0.574 | 0.477 | -22.43 ± 38.47 | 0.62 ± 40.8 | 15.09 ± 32.62 | -12.03 ± 44 |
| **SM 34:1** | 0.015 | 0.967 | 0.946 | 0.095 | 0.448 | 0.813 | 0.891 | 0.871 | 0.014 | 0.999 | 0.707 | 0.345 | -29.82 ± 68.84 | 1.75 ± 58.08 | 18.79 ± 47.12 | -21.27 ± 70.1 |
| **SM 34:2** | 0.015 | 0.999 | 0.891 | 0.140 | 0.448 | 0.926 | 0.815 | 0.913 | 0.015 | 1.000 | 0.648 | 0.408 | -24.18 ± 52.78 | 6.56 ± 49.36 | 13.93 ± 34.58 | -15.5 ± 48.64 |
| **SM 35:2** | 0.026 | 1.000 | 0.956 | 0.136 | 0.517 | 0.957 | 0.908 | 0.900 | 0.024 | 0.998 | 0.691 | 0.463 | -10.72 ± 28.15 | 2.98 ± 28.59 | 6.03 ± 22.45 | -7.31 ± 29.46 |
| **SM 36:2** | 0.007 | 1.000 | 0.893 | 0.079 | 0.347 | 0.936 | 0.818 | 0.845 | 0.006 | 1.000 | 0.622 | 0.296 | -26.37 ± 54.66 | 5.05 ± 49.94 | 15.58 ± 38.79 | -17.08 ± 56.42 |
| **Taurine** | 0.997 | 0.246 | 1.000 | 0.998 | 0.836 | 0.955 | 1.000 | 0.821 | 0.998 | 0.397 | 0.992 | 1.000 | -16.11 ± 67.29 | -10.01 ± 103.03 | 23.43 ± 68.74 | 5.63 ± 38.77 |
| **Trans-**  **cinnamic acid** | 0.014 | 0.999 | 0.081 | 0.964 | 0.151 | 0.999 | 0.097 | 0.987 | 0.015 | 0.921 | 0.011 | 0.999 | -15.3 ± 37.19 | -2.94 ± 34.52 | 20.83 ± 29.86 | 3.43 ± 26.21 |
| **Tryptophan** | 0.203 | 0.977 | 0.738 | 0.855 | 0.520 | 0.995 | 0.755 | 0.962 | 0.200 | 1.000 | 0.427 | 0.996 | -14.22 ± 43.06 | 5.11 ± 45.68 | 14.16 ± 34.74 | -2.04 ± 36.3 |
| **Tyrosine** | 0.027 | 0.962 | 0.112 | 0.976 | 0.096 | 1.000 | 0.167 | 0.912 | 0.029 | 1.000 | 0.021 | 0.999 | -13.65 ± 30.79 | 1.67 ± 34.53 | 25.18 ± 24.75 | 8.4 ± 29.65 |
| **Uric acid** | 0.098 | 0.584 | 0.535 | 0.845 | 0.179 | 0.564 | 0.633 | 0.776 | 0.099 | 0.429 | 0.330 | 0.984 | -28.41 ± 42.97 | 25.15 ± 43.1 | 23.95 ± 34.6 | -6.35 ± 55.64 |
| **Valine** | 0.166 | 1.000 | 0.868 | 0.658 | 0.226 | 0.994 | 0.928 | 0.615 | 0.158 | 0.999 | 0.501 | 0.971 | -7.49 ± 15.72 | 4.58 ± 21.17 | 3.03 ± 11.44 | -4.91 ± 11.74 |

Mixed-meal tests for each metabolite were estimated as the incremental area under the curve (iAUC) using the time points 0, 30, and 90 min. Model 1, fitted models were adjusted for age; Model 2, models were adjusted for age and weight loss; Model 3, models were adjusted for age and levels of fasting insulin. VLCD, very low-calorie diet; RYGB (1d), immediate effect of gastric bypass surgery; RYGB (6w), 6-week effect of gastric bypass surgery; Cum. Effect, cumulative effect of the intervention.

**Table 10B.** Linear-mixed-effect models fitted to lipidomics data between study occasions (mixed-meal test).

|  | **Model 1**  **(adjusted for age)** | | | | **Model 2**  **(adj. for age and weight loss)** | | | | **Model 3**  **(adj. for age and insulin)** | | | | **Direction (Mean, SD)** | | | |
| --- | --- | --- | --- | --- | --- | --- | --- | --- | --- | --- | --- | --- | --- | --- | --- | --- |
|  | Effect of VLCD | RYGB (1d) | RYGB (6w) | Cum. effect | Effect of VLCD | RYGB (1d) | RYGB (6w) | Cum. effect | Effect of VLCD | RYGB (1d) | RYGB (6w) | Cum. effect | Effect of VLCD | RYGB (1d) | RYGB (6w) | Cum. effect |
| **CE16.0*** | 1.000 | 0.994 | 0.642 | 0.762 | 0.931 | 0.996 | 0.762 | 1.000 | 1.000 | 0.999 | 0.531 | 0.647 | 21.21 ± 89.4 | -22.97 ± 102.39 | 25.98 ± 122.99 | 38.21 ± 107.71 |
| **CE18.1*** | 0.885 | 0.999 | 0.843 | 0.323 | 0.332 | 0.603 | 0.638 | 0.091 | 0.888 | 0.956 | 0.997 | 0.758 | -9.04 ± 28.36 | 1.95 ± 31.38 | 0.53 ± 32.63 | -5.49 ± 26.79 |
| **CE18.2*** | 0.811 | 0.988 | 0.920 | 0.999 | 0.960 | 0.999 | 0.917 | 1.000 | 0.793 | 1.000 | 0.999 | 0.925 | -21.04 ± 86.39 | 26.36 ± 111.66 | 20.63 ± 103.01 | 5.2 ± 102.91 |
| **CE18.3*** | 0.141 | 1.000 | 1.000 | 0.177 | 0.629 | 0.998 | 1.000 | 0.782 | 0.145 | 1.000 | 1.000 | 0.203 | 39.28 ± 130.29 | -6.32 ± 139.56 | 21.25 ± 126.1 | 57.98 ± 105.24 |
| **CE20.4*** | 0.818 | 0.378 | 0.998 | 0.653 | 0.642 | 0.333 | 0.988 | 0.541 | 0.822 | 0.396 | 0.999 | 0.718 | -15.36 ± 55.36 | 19.06 ± 79.63 | 3.55 ± 51.07 | -6.09 ± 61.09 |
| **LPC16.0*** | 0.178 | 0.182 | 0.760 | 0.803 | 0.021 | 0.021 | 0.946 | 0.137 | 0.185 | 0.188 | 0.757 | 0.870 | -15.33 ± 24.66 | 15.19 ± 43.55 | 16.53 ± 35.37 | 1.99 ± 36.77 |
| **LPC16.1*** | 0.502 | 0.442 | 0.630 | 1.000 | 0.058 | 0.049 | 0.877 | 0.329 | 0.511 | 0.441 | 0.633 | 1.000 | -21.04 ± 52.72 | 16.19 ± 83.53 | 30.18 ± 86.19 | 7.32 ± 85.92 |
| **LPC18.0*** | 0.350 | 0.063 | 0.404 | 1.000 | 0.031 | 0.005 | 0.686 | 0.333 | 0.359 | 0.060 | 0.382 | 1.000 | -22.67 ± 37.26 | 36.48 ± 78.32 | 35.08 ± 65.3 | 12.34 ± 65.23 |
| **LPC18.1*** | 0.404 | 0.321 | 0.965 | 0.782 | 0.061 | 0.047 | 1.000 | 0.150 | 0.412 | 0.328 | 0.960 | 0.849 | -14.35 ± 37.24 | 15.81 ± 61.2 | 16.73 ± 48.36 | 1.8 ± 52.77 |
| **LPC18.2*** | 0.401 | 0.719 | 0.817 | 0.949 | 0.063 | 0.145 | 0.965 | 0.255 | 0.410 | 0.685 | 0.775 | 0.983 | -14.91 ± 46.06 | 13.46 ± 71.02 | 27.84 ± 67.9 | 9.83 ± 75.99 |
| **LPC20.3*** | 0.904 | 0.950 | 0.644 | 0.985 | 0.569 | 0.994 | 0.811 | 0.962 | 0.906 | 0.971 | 0.614 | 0.971 | -4.54 ± 62.01 | -5.56 ± 133.18 | 41.54 ± 69.07 | 31.97 ± 83.75 |
| **LPC20.4*** | 0.116 | 0.688 | 0.934 | 0.017 | 0.083 | 0.385 | 0.836 | 0.033 | 0.117 | 0.613 | 0.986 | 0.051 | -33.3 ± 99.75 | 17.32 ± 100.54 | 7.76 ± 100.63 | -30.9 ± 155.83 |
| **LPC22.6*** | 0.801 | 0.991 | 0.865 | 1.000 | 0.581 | 0.840 | 0.942 | 0.907 | 0.801 | 0.997 | 0.941 | 0.998 | -8.86 ± 64.42 | 5.4 ± 94.64 | 18.85 ± 65.89 | 10.32 ± 64.52 |
| **PC32.0*** | 0.166 | 0.598 | 0.999 | 0.252 | 0.083 | 0.271 | 1.000 | 0.134 | 0.173 | 0.544 | 0.993 | 0.414 | -14.15 ± 18.96 | 8.56 ± 42.58 | 9.25 ± 35.13 | -3.81 ± 37.63 |
| **PC32.1*** | 0.818 | 0.998 | 0.992 | 0.574 | 0.442 | 0.762 | 0.952 | 0.296 | 0.824 | 0.974 | 1.000 | 0.871 | 15.21 ± 54.11 | 3.39 ± 48.77 | 10.76 ± 62.48 | 25.87 ± 70.1 |
| **PC32.2*** | 0.799 | 0.852 | 0.271 | 0.877 | 0.117 | 0.138 | 0.523 | 0.731 | 0.803 | 0.649 | 0.102 | 0.568 | -38.98 ± 97.69 | 106.77 ± 186.94 | 80.54 ± 146.84 | 56.72 ± 150.27 |
| **PC34.0*** | 0.644 | 0.685 | 0.975 | 0.928 | 0.364 | 0.390 | 0.997 | 0.593 | 0.652 | 0.589 | 0.912 | 0.991 | -26.09 ± 69.61 | 17.25 ± 128.98 | 34.53 ± 141.02 | 14.49 ± 136.35 |
| **PC34.1*** | 0.333 | 0.725 | 0.998 | 0.201 | 0.425 | 0.706 | 0.993 | 0.377 | 0.341 | 0.625 | 1.000 | 0.406 | -6.2 ± 11.52 | 3.9 ± 17.65 | 3.65 ± 20.64 | -1.12 ± 23.2 |
| **PC34.2*** | 0.372 | 0.821 | 0.998 | 0.534 | 0.401 | 0.725 | 1.000 | 0.556 | 0.378 | 0.692 | 0.961 | 0.817 | -5.44 ± 6.42 | 4.24 ± 12.56 | 4.81 ± 17.89 | 0.41 ± 18.22 |
| **PC34.3*** | 0.958 | 0.614 | 0.740 | 0.981 | 0.478 | 0.212 | 0.903 | 0.879 | 0.961 | 0.518 | 0.605 | 0.923 | -14.05 ± 70.98 | 35.72 ± 114.18 | 51.55 ± 123.64 | 40.27 ± 127.32 |
| **PC36.1*** | 0.919 | 0.981 | 0.636 | 0.190 | 0.975 | 0.997 | 0.645 | 0.656 | 0.923 | 0.997 | 0.862 | 0.432 | -27.78 ± 186.37 | 16.49 ± 59.04 | 35.69 ± 87.16 | 46.01 ± 165.4 |
| **PC36.2*** | 0.450 | 0.188 | 0.815 | 0.968 | 0.125 | 0.052 | 0.952 | 0.414 | 0.455 | 0.116 | 0.602 | 1.000 | -12.14 ± 17.52 | 18.16 ± 37.35 | 16.47 ± 38.44 | 5.28 ± 41 |
| **PC36.3*** | 0.788 | 0.244 | 0.355 | 0.942 | 0.140 | 0.027 | 0.616 | 0.719 | 0.794 | 0.156 | 0.203 | 0.779 | -4.33 ± 16.22 | 11.11 ± 23.26 | 14.05 ± 26.7 | 9.71 ± 31.69 |
| **PC36.4*** | 0.027 | 0.949 | 0.778 | 0.001 | 0.352 | 0.999 | 0.831 | 0.156 | 0.028 | 0.958 | 0.799 | 0.001 | -5.3 ± 7.38 | -0.25 ± 8.7 | -0.09 ± 9.11 | -4.59 ± 12.1 |
| **PC36.5*** | 0.655 | 0.202 | 0.961 | 0.953 | 0.235 | 0.069 | 0.997 | 0.444 | 0.664 | 0.158 | 0.889 | 0.995 | -8.02 ± 35.94 | 15 ± 44.49 | 17.59 ± 43.7 | 11.8 ± 57.79 |
| **PC38.3*** | 0.980 | 0.224 | 0.238 | 0.528 | 0.343 | 0.032 | 0.452 | 0.969 | 0.982 | 0.164 | 0.158 | 0.381 | -1.33 ± 32.26 | 22.56 ± 43.56 | 30.16 ± 50.61 | 27.79 ± 63.18 |
| **PC38.4*** | 0.109 | 0.138 | 0.999 | 0.179 | 0.231 | 0.265 | 1.000 | 0.373 | 0.114 | 0.122 | 0.993 | 0.318 | -4.86 ± 7.29 | 4.9 ± 14.77 | 3.86 ± 11.23 | -1.2 ± 11.24 |
| **PC38.5*** | 0.351 | 0.312 | 0.972 | 0.707 | 0.927 | 0.910 | 0.941 | 0.999 | 0.359 | 0.239 | 0.897 | 0.899 | -8.79 ± 29.21 | 12.54 ± 26.39 | 5.31 ± 26.34 | 1.53 ± 34.23 |
| **PC38.6*** | 0.015 | 0.159 | 0.994 | 0.004 | 0.015 | 0.089 | 0.956 | 0.011 | 0.015 | 0.117 | 1.000 | 0.021 | -14.15 ± 18.11 | 7.28 ± 25.26 | 2.46 ± 22.58 | -9.5 ± 27.87 |
| **PC40.4*** | 0.906 | 0.475 | 0.917 | 1.000 | 0.470 | 0.197 | 0.984 | 0.766 | 0.908 | 0.515 | 0.940 | 1.000 | -5.77 ± 72.16 | 31.29 ± 94.63 | 35.87 ± 113.57 | 32.77 ± 114.63 |
| **PC40.5*** | 0.712 | 0.995 | 0.998 | 0.539 | 0.970 | 0.985 | 1.000 | 0.957 | 0.710 | 0.989 | 0.992 | 0.495 | 49.61 ± 103.81 | 4.56 ± 90.8 | 16.85 ± 74.21 | 58.31 ± 133.32 |
| **PC40.6*** | 0.096 | 0.086 | 0.994 | 0.214 | 0.026 | 0.023 | 1.000 | 0.060 | 0.097 | 0.049 | 0.924 | 0.492 | -16.28 ± 23.25 | 14.56 ± 38.04 | 9.9 ± 32.87 | -3.63 ± 36.53 |
| **SM32.1*** | 0.308 | 0.282 | 0.457 | 0.999 | 0.041 | 0.037 | 0.719 | 0.366 | 0.316 | 0.227 | 0.357 | 1.000 | -21.55 ± 39.49 | 26.29 ± 68.71 | 36.75 ± 73.92 | 16.24 ± 78.33 |
| **SM32.2*** | 0.844 | 0.758 | 0.278 | 0.844 | 0.084 | 0.063 | 0.560 | 0.624 | 0.848 | 0.773 | 0.330 | 0.867 | -6.76 ± 66.15 | 10.44 ± 85.87 | 48.21 ± 78.03 | 40.38 ± 83.28 |
| **SM33.1*** | 0.163 | 0.366 | 0.901 | 0.602 | 0.054 | 0.115 | 0.983 | 0.201 | 0.169 | 0.298 | 0.800 | 0.812 | -24.52 ± 28.37 | 20.08 ± 61.54 | 19.86 ± 57.96 | -3.21 ± 56.95 |
| **SM34.1*** | 0.250 | 0.591 | 1.000 | 0.334 | 0.240 | 0.463 | 1.000 | 0.335 | 0.255 | 0.460 | 0.981 | 0.618 | -12.07 ± 15.1 | 9.97 ± 34.23 | 8.95 ± 32.3 | -1.97 ± 35.24 |
| **SM34.2*** | 0.212 | 0.473 | 0.996 | 0.375 | 0.055 | 0.125 | 1.000 | 0.101 | 0.219 | 0.392 | 0.972 | 0.604 | -24.02 ± 34.62 | 19.33 ± 65.7 | 17.55 ± 63.45 | -4.26 ± 69.33 |
| **SM35.1*** | 0.560 | 0.237 | 0.833 | 0.100 | 0.943 | 0.775 | 0.881 | 0.724 | 0.563 | 0.290 | 0.823 | 0.120 | -40.52 ± 143.54 | 71.48 ± 171.45 | -26.58 ± 105.67 | -67.39 ± 161.51 |
| **SM36.0*** | 0.003 | 0.750 | 0.965 | 0.000 | 0.355 | 1.000 | 0.994 | 0.321 | 0.003 | 0.846 | 0.911 | 0.000 | -48.63 ± 57.12 | 14.09 ± 61.7 | 9.95 ± 81.02 | -43.97 ± 90.25 |
| **SM36.1*** | 0.048 | 1.000 | 0.747 | 0.001 | 0.645 | 0.978 | 0.850 | 0.353 | 0.048 | 0.993 | 0.958 | 0.011 | -14.65 ± 18.43 | 3.13 ± 24.83 | -1.96 ± 23.69 | -13.91 ± 29.38 |
| **SM36.2*** | 0.957 | 0.990 | 0.870 | 0.490 | 0.959 | 0.984 | 0.852 | 0.726 | 0.960 | 0.966 | 0.972 | 0.731 | -3.3 ± 39.78 | 7.18 ± 22.55 | -8.5 ± 23.35 | -6.71 ± 34.81 |
| **SM38.1*** | 0.482 | 0.711 | 0.969 | 0.840 | 0.258 | 0.390 | 0.996 | 0.485 | 0.491 | 0.625 | 0.907 | 0.956 | -14.06 ± 21.45 | 13.21 ± 49.07 | 14.92 ± 41.88 | 1.73 ± 46.16 |
| **SM38.2*** | 0.152 | 0.436 | 0.978 | 0.397 | 0.081 | 0.202 | 0.999 | 0.200 | 0.154 | 0.296 | 0.856 | 0.725 | -16.61 ± 25.69 | 11.87 ± 44.19 | 8.54 ± 31.13 | -6.49 ± 35.8 |
| **SM39.1*** | 0.289 | 0.473 | 0.421 | 0.999 | 0.136 | 0.215 | 0.604 | 0.719 | 0.298 | 0.411 | 0.349 | 1.000 | -24.59 ± 56.72 | 33.39 ± 90.22 | 47.11 ± 88.15 | 21.96 ± 89.53 |
| **SM40.0*** | 0.971 | 0.709 | 0.985 | 1.000 | 1.000 | 0.773 | 0.977 | 0.999 | 0.970 | 0.634 | 0.999 | 0.996 | 13.75 ± 128.85 | 14.52 ± 124.39 | 10.52 ± 126.03 | 35.07 ± 118 |
| **SM40.1*** | 0.588 | 0.600 | 0.566 | 1.000 | 0.155 | 0.159 | 0.789 | 0.633 | 0.597 | 0.538 | 0.487 | 0.999 | -10.53 ± 20.24 | 11.53 ± 40.61 | 18.49 ± 39.79 | 9.01 ± 43.34 |
| **SM40.2*** | 0.581 | 0.846 | 0.930 | 0.954 | 0.164 | 0.296 | 0.993 | 0.380 | 0.590 | 0.795 | 0.874 | 0.991 | -19.72 ± 38.87 | 17.36 ± 53.11 | 21.4 ± 67.92 | 4.89 ± 58.09 |
| **SM41.1*** | 0.331 | 0.505 | 0.208 | 0.999 | 0.044 | 0.074 | 0.414 | 0.570 | 0.340 | 0.467 | 0.194 | 0.992 | -18.32 ± 33.15 | 20.2 ± 58.58 | 32.56 ± 62.25 | 15.49 ± 66.67 |
| **SM41.2*** | 0.195 | 0.196 | 0.914 | 0.635 | 0.065 | 0.065 | 0.987 | 0.221 | 0.201 | 0.162 | 0.836 | 0.820 | -24.4 ± 51.35 | 31.44 ± 86.82 | 27.38 ± 80.55 | 4.14 ± 81.65 |
| **SM42.1*** | 0.072 | 0.087 | 0.085 | 1.000 | 0.027 | 0.033 | 0.178 | 0.674 | 0.076 | 0.092 | 0.102 | 1.000 | -29.69 ± 68.27 | 30.37 ± 73.83 | 38.45 ± 80.67 | 9.87 ± 60.53 |
| **SM42.2*** | 0.130 | 0.288 | 1.000 | 0.165 | 0.025 | 0.055 | 0.998 | 0.035 | 0.135 | 0.234 | 0.995 | 0.334 | -13.1 ± 16.89 | 10.36 ± 29 | 6.75 ± 28.03 | -4.68 ± 29.69 |
| **SM42.3*** | 0.083 | 0.563 | 0.971 | 0.017 | 0.042 | 0.230 | 0.882 | 0.019 | 0.086 | 0.466 | 0.998 | 0.063 | -21.51 ± 23.38 | 11.68 ± 45.48 | 5.15 ± 44.81 | -13.91 ± 44.64 |
| **SM43.1*** | 0.840 | 0.987 | 0.022 | 0.223 | 0.293 | 0.499 | 0.058 | 1.000 | 0.841 | 0.994 | 0.049 | 0.343 | -24.98 ± 69.46 | 17.3 ± 132.48 | 95.26 ± 115.68 | 37.16 ± 140.56 |
| **SM43.2*** | 0.281 | 0.601 | 1.000 | 0.224 | 0.050 | 0.121 | 0.978 | 0.042 | 0.282 | 0.501 | 1.000 | 0.432 | -65.6 ± 105.91 | 44.21 ± 101.81 | 37.09 ± 146.29 | -26.48 ± 193.92 |
| **SM44.2*** | 0.891 | 0.610 | 0.996 | 0.980 | 0.445 | 0.253 | 1.000 | 0.563 | 0.896 | 0.515 | 0.969 | 0.999 | -27.59 ± 105.32 | 30.71 ± 161.84 | 2.33 ± 151.24 | 10.33 ± 114 |
| **TG48.1*** | 0.641 | 0.730 | 0.157 | 0.004 | 0.967 | 0.753 | 0.204 | 0.302 | 0.610 | 0.479 | 0.044 | 0.001 | 31.61 ± 55.55 | 10.3 ± 49.7 | 29.07 ± 63.4 | 62.41 ± 87.42 |
| **TG48.2*** | 0.991 | 0.234 | 0.065 | 0.168 | 0.576 | 0.076 | 0.143 | 1.000 | 0.992 | 0.253 | 0.089 | 0.210 | 3.41 ± 61.03 | 29.31 ± 45.29 | 44.87 ± 65.17 | 48.88 ± 86.05 |
| **TG50.0*** | 0.514 | 0.932 | 0.671 | 0.042 | 0.549 | 0.864 | 0.609 | 0.173 | 0.512 | 0.972 | 0.567 | 0.034 | 41.33 ± 87.09 | -15.99 ± 63.34 | 32.65 ± 73.89 | 63.63 ± 107.52 |
| **TG50.1*** | 0.939 | 0.879 | 0.444 | 0.870 | 0.681 | 0.605 | 0.594 | 0.999 | 0.943 | 0.781 | 0.305 | 0.714 | 0.68 ± 24.08 | 2.64 ± 19.24 | 9.99 ± 21.88 | 11.77 ± 29.74 |
| **TG50.2*** | 0.875 | 0.433 | 0.676 | 0.995 | 0.461 | 0.193 | 0.841 | 0.906 | 0.880 | 0.389 | 0.606 | 0.979 | -2.48 ± 27.41 | 10.16 ± 21.03 | 12.44 ± 24.84 | 12.24 ± 35.7 |
| **TG50.3*** | 0.759 | 0.250 | 0.699 | 1.000 | 0.221 | 0.057 | 0.891 | 0.651 | 0.766 | 0.229 | 0.647 | 0.999 | -4.99 ± 38.25 | 18.87 ± 36.74 | 20.21 ± 41.09 | 17.7 ± 53.59 |
| **TG50.4*** | 0.982 | 0.074 | 0.140 | 0.355 | 0.978 | 0.257 | 0.171 | 0.868 | 0.982 | 0.119 | 0.269 | 0.551 | -10.39 ± 91.04 | 94.27 ± 118.08 | 66.41 ± 116.82 | 73.18 ± 112.02 |
| **TG52.1*** | 0.990 | 0.825 | 1.000 | 0.987 | 1.000 | 0.721 | 1.000 | 0.999 | 0.989 | 0.723 | 0.996 | 0.924 | 6.4 ± 44.48 | 8.77 ± 41.33 | 9.41 ± 40.68 | 19.47 ± 59.36 |
| **TG52.2*** | 0.086 | 0.217 | 0.959 | 0.015 | 0.100 | 0.189 | 0.900 | 0.050 | 0.091 | 0.201 | 0.988 | 0.040 | -7.36 ± 12.65 | 5.98 ± 12.52 | 2.07 ± 14.06 | -3.17 ± 17.81 |
| **TG52.3*** | 0.072 | 0.246 | 1.000 | 0.051 | 0.082 | 0.195 | 0.996 | 0.089 | 0.076 | 0.250 | 1.000 | 0.093 | -9.55 ± 15.58 | 7.79 ± 18.87 | 4.24 ± 19.74 | -3.34 ± 24.21 |
| **TG52.4*** | 0.287 | 0.315 | 0.981 | 0.589 | 0.075 | 0.082 | 1.000 | 0.166 | 0.295 | 0.297 | 0.964 | 0.728 | -9.65 ± 29.05 | 13.57 ± 36.26 | 11.55 ± 35.6 | 4.38 ± 42.95 |
| **TG52.5*** | 0.920 | 0.652 | 0.998 | 0.985 | 0.225 | 0.104 | 1.000 | 0.277 | 0.924 | 0.576 | 0.982 | 0.999 | -4.13 ± 41.67 | 18.75 ± 43.79 | 16.63 ± 52.34 | 16.13 ± 66.14 |
| **TG54.3*** | 0.066 | 0.680 | 0.499 | 0.000 | 0.051 | 0.362 | 0.352 | 0.004 | 0.070 | 0.677 | 0.596 | 0.001 | -12.25 ± 16.31 | 6.49 ± 13.86 | 0.67 ± 19.81 | -8.34 ± 24.19 |
| **TG54.4*** | 0.054 | 0.780 | 0.997 | 0.024 | 0.036 | 0.387 | 0.971 | 0.029 | 0.057 | 0.764 | 1.000 | 0.050 | -14.65 ± 21.71 | 8.46 ± 27.1 | 5.77 ± 28.42 | -6.27 ± 35.19 |
| **TG54.5*** | 0.342 | 0.880 | 0.996 | 0.187 | 0.229 | 0.591 | 0.974 | 0.170 | 0.349 | 0.779 | 1.000 | 0.415 | -16.78 ± 38.95 | 11.71 ± 58 | 10.75 ± 59.84 | -4.21 ± 70.44 |
| **TG54.6*** | 0.967 | 0.786 | 0.960 | 1.000 | 0.693 | 0.481 | 0.993 | 0.891 | 0.969 | 0.740 | 0.923 | 0.999 | -6.47 ± 88.03 | 21.71 ± 80.3 | 17.35 ± 85.53 | 18.04 ± 89.6 |
| **TG56.6*** | 0.082 | 0.601 | 0.848 | 0.005 | 0.069 | 0.347 | 0.720 | 0.018 | 0.085 | 0.645 | 0.854 | 0.009 | -18.18 ± 32.83 | 11.55 ± 38.97 | 4.04 ± 37.91 | -10.56 ± 49.35 |

Mixed-meal tests for each metabolite were estimated as the incremental area under the curve (iAUC) using the time points 0, 30, and 90 min. Model 1, fitted models were adjusted for age; Model 2, models were adjusted for age and weight loss; Model 3, models were adjusted for age and levels of fasting insulin. VLCD, very low-calorie diet; RYGB (1d), immediate effect of gastric bypass surgery; RYGB (6w), 6-week effect of gastric bypass surgery; Cum. Effect, cumulative effect of the intervention.

**Table 11A.** Assessment of difference in metabolomics data between normoglycaemic and T2D patients (mixed-meal test).

|  | **Occasion:**  **Baseline** | | **Occasion:**  **Diet** | | **Occasion:**  **Surgery** | | **Occasion:**  **Recovery** | | **Effect of VLCD** | | **RYGB (1d)** | | **RYGB (6w)** | | **Cum. effect** | |
| --- | --- | --- | --- | --- | --- | --- | --- | --- | --- | --- | --- | --- | --- | --- | --- | --- |
|  | *P a* | *P b* | *P a* | *P b* | *P a* | *P b* | *P a* | *P b* | *P a* | *P b* | *P a* | *P b* | *P a* | *P b* | *P a* | *P b* |
| **1-Methyl-adenosine** | 0.705 | 0.884 | 0.738 | 0.992 | 0.491 | 0.751 | 0.373 | 0.608 | 0.926 | 0.964 | 0.448 | 0.923 | 0.375 | 0.965 | 0.236 | 0.327 |
| **1-Methylhistidine** | 0.829 | 0.922 | 0.242 | 0.992 | 0.438 | 0.743 | 0.656 | 0.769 | 0.264 | 0.489 | 0.132 | 0.923 | 0.225 | 0.965 | 0.606 | 0.675 |
| **2-Hydroxycinnamic acid** | 0.161 | 0.513 | 0.466 | 0.992 | 0.045 | 0.673 | 0.092 | 0.502 | 0.110 | 0.430 | 0.315 | 0.923 | 0.398 | 0.965 | 0.015 | 0.110 |
| **3-Hydroxybutyrate** | 0.337 | 0.631 | 0.373 | 0.992 | 0.227 | 0.673 | 0.331 | 0.578 | 0.539 | 0.650 | 0.164 | 0.923 | 0.188 | 0.965 | 0.140 | 0.221 |
| **5-Oxoproline** | 0.372 | 0.650 | 0.566 | 0.992 | 0.056 | 0.673 | 0.564 | 0.730 | 0.872 | 0.925 | 0.195 | 0.923 | 0.483 | 0.965 | 0.100 | 0.185 |
| **Acetylalanine** | 0.740 | 0.891 | 0.608 | 0.992 | 0.132 | 0.673 | 0.160 | 0.519 | 0.722 | 0.785 | 0.231 | 0.923 | 0.317 | 0.965 | 0.221 | 0.314 |
| **Alanine** | 0.600 | 0.843 | 0.446 | 0.992 | 0.107 | 0.673 | 0.330 | 0.578 | 0.532 | 0.650 | 0.217 | 0.923 | 0.350 | 0.965 | 0.157 | 0.242 |
| **Arginine** | 0.532 | 0.774 | 0.288 | 0.992 | 0.421 | 0.743 | 0.609 | 0.744 | 0.239 | 0.480 | 0.143 | 0.923 | 0.259 | 0.965 | 0.908 | 0.919 |
| **Asparagine** | 0.744 | 0.891 | 0.440 | 0.992 | 0.187 | 0.673 | 0.092 | 0.502 | 0.489 | 0.610 | 0.242 | 0.923 | 0.325 | 0.965 | 0.167 | 0.253 |
| **Aspartic acid** | 0.410 | 0.687 | 0.493 | 0.992 | 0.657 | 0.826 | 0.697 | 0.786 | 0.906 | 0.949 | 0.677 | 0.923 | 0.453 | 0.965 | 0.337 | 0.409 |
| **Caffeine** | 0.555 | 0.799 | 0.485 | 0.992 | 0.209 | 0.673 | 0.464 | 0.659 | 0.397 | 0.550 | 0.094 | 0.923 | 0.714 | 0.965 | 0.386 | 0.449 |
| **Carnitine** | 0.246 | 0.569 | 0.986 | 0.992 | 0.377 | 0.727 | 0.966 | 0.986 | 0.451 | 0.588 | 0.494 | 0.923 | 0.966 | 0.991 | 0.391 | 0.449 |
| **Carnitine C10:0** | 0.157 | 0.513 | 0.061 | 0.992 | 0.061 | 0.673 | 0.174 | 0.529 | 0.035 | 0.426 | 0.656 | 0.923 | 0.471 | 0.965 | 0.061 | 0.149 |
| **Carnitine C10:1** | 0.125 | 0.513 | 0.052 | 0.992 | 0.098 | 0.673 | 0.321 | 0.578 | 0.028 | 0.426 | 0.501 | 0.923 | 0.306 | 0.965 | 0.079 | 0.161 |
| **Carnitine C10:2** | 0.116 | 0.513 | 0.282 | 0.992 | 0.142 | 0.673 | 0.091 | 0.502 | 0.058 | 0.430 | 0.754 | 0.923 | 0.674 | 0.965 | 0.037 | 0.119 |
| **Carnitine C12:0** | 0.175 | 0.513 | 0.204 | 0.992 | 0.044 | 0.673 | 0.158 | 0.519 | 0.092 | 0.430 | 0.908 | 0.953 | 0.779 | 0.965 | 0.036 | 0.119 |
| **Carnitine C12:1** | 0.139 | 0.513 | 0.078 | 0.992 | 0.125 | 0.673 | 0.117 | 0.502 | 0.025 | 0.426 | 0.649 | 0.923 | 0.611 | 0.965 | 0.023 | 0.110 |
| **Carnitine C14:0** | 0.172 | 0.513 | 0.530 | 0.992 | 0.072 | 0.673 | 0.404 | 0.619 | 0.122 | 0.430 | 0.570 | 0.923 | 0.928 | 0.991 | 0.063 | 0.149 |
| **Carnitine C14:1** | 0.208 | 0.513 | 0.189 | 0.992 | 0.105 | 0.673 | 0.090 | 0.502 | 0.074 | 0.430 | 0.901 | 0.953 | 0.963 | 0.991 | 0.028 | 0.110 |
| **Carnitine C14:2** | 0.169 | 0.513 | 0.095 | 0.992 | 0.121 | 0.673 | 0.507 | 0.681 | 0.041 | 0.427 | 0.892 | 0.953 | 0.218 | 0.965 | 0.091 | 0.175 |
| **Carnitine C16:0** | 0.039 | 0.513 | 0.766 | 0.992 | 0.187 | 0.673 | 0.615 | 0.744 | 0.074 | 0.430 | 0.582 | 0.923 | 0.881 | 0.981 | 0.018 | 0.110 |
| **Carnitine C18:0** | 0.091 | 0.513 | 0.527 | 0.992 | 0.349 | 0.714 | 0.601 | 0.744 | 0.111 | 0.430 | 0.884 | 0.953 | 0.945 | 0.991 | 0.027 | 0.110 |
| **Carnitine C18:1** | 0.068 | 0.513 | 0.536 | 0.992 | 0.206 | 0.673 | 0.745 | 0.820 | 0.044 | 0.430 | 0.726 | 0.923 | 0.880 | 0.981 | 0.078 | 0.161 |
| **Carnitine C18:2** | 0.019 | 0.513 | 0.450 | 0.992 | 0.308 | 0.688 | 0.998 | 0.998 | 0.036 | 0.426 | 0.894 | 0.953 | 0.620 | 0.965 | 0.116 | 0.202 |
| **Carnitine C2:0** | 0.191 | 0.513 | 0.177 | 0.992 | 0.409 | 0.743 | 0.141 | 0.502 | 0.033 | 0.426 | 0.818 | 0.939 | 0.831 | 0.969 | 0.102 | 0.185 |
| **Carnitine C3:0** | 0.040 | 0.513 | 0.136 | 0.992 | 0.314 | 0.688 | 0.603 | 0.744 | 0.012 | 0.426 | 0.867 | 0.953 | 0.630 | 0.965 | 0.112 | 0.197 |
| **Carnitine C4:0** | 0.086 | 0.513 | 0.630 | 0.992 | 0.037 | 0.673 | 0.491 | 0.670 | 0.132 | 0.430 | 0.249 | 0.923 | 0.939 | 0.991 | 0.072 | 0.156 |
| **Carnitine C5:0** | 0.284 | 0.596 | 0.955 | 0.992 | 0.306 | 0.688 | 0.581 | 0.743 | 0.418 | 0.561 | 0.419 | 0.923 | 0.695 | 0.965 | 0.251 | 0.336 |
| **Carnitine C6:0** | 0.341 | 0.632 | 0.046 | 0.992 | 0.160 | 0.673 | 0.142 | 0.502 | 0.039 | 0.427 | 0.565 | 0.923 | 0.574 | 0.965 | 0.070 | 0.156 |
| **Carnitine C8:0** | 0.137 | 0.513 | 0.071 | 0.992 | 0.042 | 0.673 | 0.131 | 0.502 | 0.031 | 0.426 | 0.487 | 0.923 | 0.473 | 0.965 | 0.040 | 0.127 |
| **Carnitine C8:1** | 0.136 | 0.513 | 0.826 | 0.992 | 0.534 | 0.774 | 0.176 | 0.529 | 0.158 | 0.453 | 0.778 | 0.923 | 0.384 | 0.965 | 0.015 | 0.110 |
| **Citric acid** | 0.439 | 0.700 | 0.910 | 0.992 | 0.441 | 0.743 | 0.090 | 0.502 | 0.421 | 0.561 | 0.737 | 0.923 | 0.528 | 0.965 | 0.053 | 0.139 |
| **Creatine** | 0.980 | 0.980 | 0.364 | 0.992 | 0.239 | 0.673 | 0.835 | 0.888 | 0.363 | 0.532 | 0.145 | 0.923 | 0.361 | 0.965 | 0.799 | 0.833 |
| **Cystine** | 0.515 | 0.769 | 0.377 | 0.992 | 0.045 | 0.673 | 0.978 | 0.986 | 0.315 | 0.493 | 0.186 | 0.923 | 0.377 | 0.965 | 0.623 | 0.690 |
| **Dihydroorotic acid** | 0.258 | 0.585 | 0.300 | 0.992 | 0.252 | 0.673 | 0.180 | 0.529 | 0.950 | 0.978 | 0.138 | 0.923 | 0.126 | 0.965 | 0.101 | 0.185 |
| **Gluconic acid** | 0.931 | 0.973 | 0.435 | 0.992 | 0.526 | 0.774 | 0.109 | 0.502 | 0.469 | 0.594 | 0.377 | 0.923 | 0.246 | 0.965 | 0.386 | 0.449 |
| **Glucosamine-6-phosphate** | 0.961 | 0.973 | 0.193 | 0.992 | 0.064 | 0.673 | 0.823 | 0.885 | 0.182 | 0.453 | 0.076 | 0.923 | 0.206 | 0.965 | 0.819 | 0.843 |
| **Glutamic acid** | 0.875 | 0.962 | 0.590 | 0.992 | 0.299 | 0.688 | 0.063 | 0.502 | 0.537 | 0.650 | 0.440 | 0.923 | 0.258 | 0.965 | 0.126 | 0.211 |
| **Glutamine** | 0.641 | 0.860 | 0.369 | 0.992 | 0.163 | 0.673 | 0.695 | 0.786 | 0.404 | 0.551 | 0.165 | 0.923 | 0.351 | 0.965 | 0.376 | 0.447 |
| **Glyceric acid** | 0.942 | 0.973 | 0.550 | 0.992 | 0.116 | 0.673 | 0.208 | 0.529 | 0.558 | 0.668 | 0.226 | 0.923 | 0.245 | 0.965 | 0.312 | 0.392 |
| **Hippuric acid** | 0.156 | 0.513 | 0.598 | 0.992 | 0.468 | 0.748 | 0.358 | 0.599 | 0.193 | 0.453 | 0.742 | 0.923 | 0.782 | 0.965 | 0.077 | 0.161 |
| **Histidine** | 0.716 | 0.888 | 0.277 | 0.992 | 0.367 | 0.727 | 0.843 | 0.888 | 0.263 | 0.489 | 0.136 | 0.923 | 0.309 | 0.965 | 0.672 | 0.716 |
| **Hydroxyproline** | 0.639 | 0.860 | 0.422 | 0.992 | 0.126 | 0.673 | 0.274 | 0.567 | 0.319 | 0.493 | 0.487 | 0.923 | 0.873 | 0.981 | 0.243 | 0.331 |
| **Hypoxanthine** | 0.150 | 0.513 | 0.482 | 0.992 | 0.104 | 0.673 | 0.283 | 0.567 | 0.062 | 0.430 | 0.583 | 0.923 | 0.226 | 0.965 | 0.793 | 0.831 |
| **Indole** | 0.195 | 0.513 | 0.948 | 0.992 | 0.056 | 0.673 | 0.367 | 0.608 | 0.301 | 0.493 | 0.322 | 0.923 | 0.569 | 0.965 | 0.063 | 0.149 |
| **Kynurenine** | 0.193 | 0.513 | 0.920 | 0.992 | 0.525 | 0.774 | 0.842 | 0.888 | 0.319 | 0.493 | 0.631 | 0.923 | 0.816 | 0.965 | 0.139 | 0.221 |
| **Lactic acid** | 0.889 | 0.972 | 0.563 | 0.992 | 0.135 | 0.673 | 0.024 | 0.502 | 0.466 | 0.594 | 0.204 | 0.923 | 0.174 | 0.965 | 0.127 | 0.211 |
| **Leucine-Isoleucine** | 0.205 | 0.513 | 0.193 | 0.992 | 0.781 | 0.894 | 0.221 | 0.529 | 0.056 | 0.430 | 0.605 | 0.923 | 0.995 | 0.995 | 0.048 | 0.130 |
| **LPC 14:0** | 0.101 | 0.513 | 0.872 | 0.992 | 0.067 | 0.673 | 0.426 | 0.636 | 0.154 | 0.453 | 0.339 | 0.923 | 0.632 | 0.965 | 0.026 | 0.110 |
| **LPC 15:0** | 0.069 | 0.513 | 0.799 | 0.992 | 0.179 | 0.673 | 0.459 | 0.659 | 0.128 | 0.430 | 0.539 | 0.923 | 0.710 | 0.965 | 0.020 | 0.110 |
| **LPC 16:0** | 0.108 | 0.513 | 0.670 | 0.992 | 0.303 | 0.688 | 0.533 | 0.695 | 0.125 | 0.430 | 0.671 | 0.923 | 0.855 | 0.981 | 0.030 | 0.110 |
| **LPC 16:1** | 0.110 | 0.513 | 0.874 | 0.992 | 0.245 | 0.673 | 0.703 | 0.788 | 0.156 | 0.453 | 0.581 | 0.923 | 0.886 | 0.981 | 0.079 | 0.161 |
| **LPC 17:0** | 0.174 | 0.513 | 0.877 | 0.992 | 0.209 | 0.673 | 0.878 | 0.920 | 0.322 | 0.493 | 0.409 | 0.923 | 0.830 | 0.969 | 0.137 | 0.221 |
| **LPC 18:0** | 0.158 | 0.513 | 0.835 | 0.992 | 0.151 | 0.673 | 0.686 | 0.786 | 0.194 | 0.453 | 0.445 | 0.923 | 0.866 | 0.981 | 0.079 | 0.161 |
| **LPC 18:1** | 0.143 | 0.513 | 0.744 | 0.992 | 0.400 | 0.743 | 0.326 | 0.578 | 0.180 | 0.453 | 0.772 | 0.923 | 0.636 | 0.965 | 0.019 | 0.110 |
| **LPC 18:2** | 0.145 | 0.513 | 0.693 | 0.992 | 0.233 | 0.673 | 0.415 | 0.625 | 0.173 | 0.453 | 0.634 | 0.923 | 0.799 | 0.965 | 0.033 | 0.110 |
| **LPC 19:0** | 0.082 | 0.513 | 0.603 | 0.992 | 0.482 | 0.751 | 0.898 | 0.935 | 0.100 | 0.430 | 0.978 | 0.984 | 0.680 | 0.965 | 0.254 | 0.336 |
| **LPC 20:1** | 0.079 | 0.513 | 0.654 | 0.992 | 0.949 | 0.974 | 0.512 | 0.682 | 0.078 | 0.430 | 0.823 | 0.939 | 0.739 | 0.965 | 0.023 | 0.110 |
| **LPC 20:2** | 0.953 | 0.973 | 0.142 | 0.992 | 0.851 | 0.905 | 0.908 | 0.940 | 0.231 | 0.480 | 0.234 | 0.923 | 0.484 | 0.965 | 0.907 | 0.919 |
| **LPC 20:3** | 0.211 | 0.513 | 0.822 | 0.992 | 0.227 | 0.673 | 0.304 | 0.567 | 0.253 | 0.484 | 0.589 | 0.923 | 0.544 | 0.965 | 0.044 | 0.128 |
| **LPC 20:4** | 0.207 | 0.513 | 0.797 | 0.992 | 0.321 | 0.688 | 0.324 | 0.578 | 0.243 | 0.480 | 0.673 | 0.923 | 0.568 | 0.965 | 0.042 | 0.128 |
| **LPC 20:5** | 0.184 | 0.513 | 0.971 | 0.992 | 0.242 | 0.673 | 0.369 | 0.608 | 0.277 | 0.493 | 0.527 | 0.923 | 0.514 | 0.965 | 0.045 | 0.130 |
| **LPC 22:5** | 0.297 | 0.602 | 0.718 | 0.992 | 0.443 | 0.743 | 0.346 | 0.591 | 0.321 | 0.493 | 0.836 | 0.939 | 0.670 | 0.965 | 0.068 | 0.156 |
| **LPC 22:6** | 0.283 | 0.596 | 0.985 | 0.992 | 0.233 | 0.673 | 0.303 | 0.567 | 0.387 | 0.549 | 0.524 | 0.923 | 0.433 | 0.965 | 0.063 | 0.149 |
| **LPE 16:0** | 0.141 | 0.513 | 0.485 | 0.992 | 0.898 | 0.930 | 0.304 | 0.567 | 0.124 | 0.430 | 0.743 | 0.923 | 0.773 | 0.965 | 0.012 | 0.110 |
| **LPE 18:0** | 0.073 | 0.513 | 0.794 | 0.992 | 0.194 | 0.673 | 0.471 | 0.659 | 0.131 | 0.430 | 0.559 | 0.923 | 0.728 | 0.965 | 0.023 | 0.110 |
| **LPE 18:1** | 0.064 | 0.513 | 0.609 | 0.992 | 0.205 | 0.673 | 0.388 | 0.610 | 0.067 | 0.430 | 0.533 | 0.923 | 0.800 | 0.965 | 0.013 | 0.110 |
| **LPE 18:2** | 0.053 | 0.513 | 0.742 | 0.992 | 0.195 | 0.673 | 0.414 | 0.625 | 0.093 | 0.430 | 0.554 | 0.923 | 0.736 | 0.965 | 0.015 | 0.110 |
| **LPE 20:0** | 0.170 | 0.513 | 0.908 | 0.992 | 0.292 | 0.688 | 0.673 | 0.784 | 0.271 | 0.493 | 0.492 | 0.923 | 0.683 | 0.965 | 0.074 | 0.160 |
| **LPE 20:4** | 0.096 | 0.513 | 0.578 | 0.992 | 0.480 | 0.751 | 0.526 | 0.691 | 0.108 | 0.430 | 0.905 | 0.953 | 0.993 | 0.995 | 0.032 | 0.110 |
| **LPE 20:5** | 0.128 | 0.513 | 0.944 | 0.992 | 0.428 | 0.743 | 0.583 | 0.743 | 0.252 | 0.484 | 0.716 | 0.923 | 0.737 | 0.965 | 0.087 | 0.171 |
| **LPE 22:6** | 0.094 | 0.513 | 0.572 | 0.992 | 0.589 | 0.803 | 0.610 | 0.744 | 0.086 | 0.430 | 0.976 | 0.984 | 0.963 | 0.991 | 0.026 | 0.110 |
| **Lysine** | 0.898 | 0.973 | 0.332 | 0.992 | 0.200 | 0.673 | 0.654 | 0.769 | 0.326 | 0.494 | 0.188 | 0.923 | 0.320 | 0.965 | 0.805 | 0.834 |
| **Malic acid** | 0.765 | 0.897 | 0.856 | 0.992 | 0.243 | 0.673 | 0.738 | 0.817 | 0.962 | 0.978 | 0.421 | 0.923 | 0.767 | 0.965 | 0.667 | 0.716 |
| **Methionine** | 0.213 | 0.513 | 0.431 | 0.992 | 0.100 | 0.673 | 0.049 | 0.502 | 0.128 | 0.430 | 0.680 | 0.923 | 0.312 | 0.965 | 0.014 | 0.110 |
| **Mevalonic acid** | 0.684 | 0.877 | 0.818 | 0.992 | 0.087 | 0.673 | 0.282 | 0.567 | 0.950 | 0.978 | 0.284 | 0.923 | 0.467 | 0.965 | 0.270 | 0.349 |
| **Orotic acid** | 0.416 | 0.687 | 0.384 | 0.992 | 0.046 | 0.673 | 0.150 | 0.519 | 0.578 | 0.673 | 0.127 | 0.923 | 0.234 | 0.965 | 0.064 | 0.149 |
| **Paraxanthine** | 0.708 | 0.884 | 0.315 | 0.992 | 0.723 | 0.860 | 0.204 | 0.529 | 0.390 | 0.549 | 0.964 | 0.984 | 0.386 | 0.965 | 0.223 | 0.314 |
| **PC 32:1** | 0.086 | 0.513 | 0.542 | 0.992 | 0.260 | 0.673 | 0.226 | 0.529 | 0.057 | 0.430 | 0.772 | 0.923 | 0.752 | 0.965 | 0.031 | 0.110 |
| **PC 34:1** | 0.073 | 0.513 | 0.445 | 0.992 | 0.250 | 0.673 | 0.127 | 0.502 | 0.036 | 0.426 | 0.734 | 0.923 | 0.517 | 0.965 | 0.026 | 0.110 |
| **PC 34:2** | 0.143 | 0.513 | 0.969 | 0.992 | 0.409 | 0.743 | 0.286 | 0.567 | 0.172 | 0.453 | 0.594 | 0.923 | 0.403 | 0.965 | 0.052 | 0.139 |
| **PC 36:2** | 0.040 | 0.513 | 0.433 | 0.992 | 0.121 | 0.673 | 0.162 | 0.519 | 0.018 | 0.426 | 0.574 | 0.923 | 0.616 | 0.965 | 0.015 | 0.110 |
| **PC 36:3** | 0.039 | 0.513 | 0.515 | 0.992 | 0.155 | 0.673 | 0.088 | 0.502 | 0.029 | 0.426 | 0.588 | 0.923 | 0.365 | 0.965 | 0.006 | 0.110 |
| **PC 36:4** | 0.038 | 0.513 | 0.648 | 0.992 | 0.282 | 0.688 | 0.208 | 0.529 | 0.028 | 0.426 | 0.692 | 0.923 | 0.521 | 0.965 | 0.004 | 0.110 |
| **PC 38:5** | 0.018 | 0.513 | 0.575 | 0.992 | 0.132 | 0.673 | 0.208 | 0.529 | 0.019 | 0.426 | 0.506 | 0.923 | 0.517 | 0.965 | 0.002 | 0.110 |
| **PC 38:6** | 0.160 | 0.513 | 0.534 | 0.992 | 0.203 | 0.673 | 0.280 | 0.567 | 0.129 | 0.430 | 0.630 | 0.923 | 0.740 | 0.965 | 0.024 | 0.110 |
| **PC 40:7** | 0.036 | 0.513 | 0.404 | 0.992 | 0.185 | 0.673 | 0.157 | 0.519 | 0.018 | 0.426 | 0.726 | 0.923 | 0.571 | 0.965 | 0.008 | 0.110 |
| **PC 40:8** | 0.749 | 0.891 | 0.702 | 0.992 | 0.447 | 0.743 | 0.806 | 0.881 | 0.986 | 0.986 | 0.445 | 0.923 | 0.961 | 0.991 | 0.963 | 0.963 |
| **Phenylalanine** | 0.118 | 0.513 | 0.416 | 0.992 | 0.380 | 0.727 | 0.140 | 0.502 | 0.084 | 0.430 | 0.927 | 0.960 | 0.574 | 0.965 | 0.008 | 0.110 |
| **Proline** | 0.520 | 0.769 | 0.096 | 0.992 | 0.344 | 0.714 | 0.484 | 0.665 | 0.108 | 0.430 | 0.068 | 0.923 | 0.710 | 0.965 | 0.248 | 0.336 |
| **Serine** | 0.956 | 0.973 | 0.682 | 0.992 | 0.043 | 0.673 | 0.063 | 0.502 | 0.614 | 0.707 | 0.117 | 0.923 | 0.196 | 0.965 | 0.294 | 0.372 |
| **SM 32:1** | 0.138 | 0.513 | 0.965 | 0.992 | 0.088 | 0.673 | 0.287 | 0.567 | 0.183 | 0.453 | 0.302 | 0.923 | 0.459 | 0.965 | 0.032 | 0.110 |
| **SM 32:2** | 0.203 | 0.513 | 0.910 | 0.992 | 0.074 | 0.673 | 0.812 | 0.882 | 0.295 | 0.493 | 0.257 | 0.923 | 0.817 | 0.965 | 0.119 | 0.205 |
| **SM 33:1** | 0.108 | 0.513 | 0.889 | 0.992 | 0.260 | 0.673 | 0.127 | 0.502 | 0.138 | 0.442 | 0.448 | 0.923 | 0.351 | 0.965 | 0.017 | 0.110 |
| **SM 34:1** | 0.083 | 0.513 | 0.945 | 0.992 | 0.204 | 0.673 | 0.102 | 0.502 | 0.090 | 0.430 | 0.394 | 0.923 | 0.315 | 0.965 | 0.027 | 0.110 |
| **SM 34:2** | 0.137 | 0.513 | 0.918 | 0.992 | 0.161 | 0.673 | 0.229 | 0.529 | 0.162 | 0.453 | 0.434 | 0.923 | 0.436 | 0.965 | 0.030 | 0.110 |
| **SM 35:2** | 0.024 | 0.513 | 0.730 | 0.992 | 0.264 | 0.674 | 0.225 | 0.529 | 0.033 | 0.426 | 0.603 | 0.923 | 0.476 | 0.965 | 0.006 | 0.110 |
| **SM 36:2** | 0.080 | 0.513 | 0.685 | 0.992 | 0.182 | 0.673 | 0.114 | 0.502 | 0.071 | 0.430 | 0.542 | 0.923 | 0.412 | 0.965 | 0.013 | 0.110 |
| **Taurine** | 0.362 | 0.650 | 0.248 | 0.992 | 0.219 | 0.673 | 0.210 | 0.529 | 0.567 | 0.669 | 0.137 | 0.923 | 0.111 | 0.965 | 0.071 | 0.156 |
| **Transcinnamic acid** | 0.218 | 0.519 | 0.231 | 0.992 | 0.630 | 0.815 | 0.169 | 0.529 | 0.093 | 0.430 | 0.533 | 0.923 | 0.967 | 0.991 | 0.030 | 0.110 |
| **Tryptophan** | 0.263 | 0.585 | 0.810 | 0.992 | 0.028 | 0.673 | 0.380 | 0.608 | 0.322 | 0.493 | 0.300 | 0.923 | 0.697 | 0.965 | 0.096 | 0.182 |
| **Tyrosine** | 0.146 | 0.513 | 0.394 | 0.992 | 0.047 | 0.673 | 0.096 | 0.502 | 0.070 | 0.430 | 0.350 | 0.923 | 0.447 | 0.965 | 0.018 | 0.110 |
| **Uric acid** | 0.279 | 0.596 | 0.817 | 0.992 | 0.794 | 0.894 | 0.461 | 0.659 | 0.393 | 0.549 | 0.780 | 0.923 | 0.426 | 0.965 | 0.150 | 0.235 |
| **Valine** | 0.128 | 0.513 | 0.902 | 0.992 | 0.179 | 0.673 | 0.596 | 0.744 | 0.113 | 0.430 | 0.262 | 0.923 | 0.534 | 0.965 | 0.373 | 0.447 |

Mixed-meal tests for each metabolite were estimated as the incremental area under the curve (iAUC) using the time points 0, 30, and 90 min. P a, p-value as estimated by unequal variances t-test; P b, p-value as estimated by unequal variances t-test adjusted for multiple testing according to the false discovery rate method. VLCD, very low-calorie diet; RYGB (1d), immediate effect of gastric bypass surgery; RYGB (6w), 6-week effect of gastric bypass surgery; Cum. Effect, cumulative effect of the intervention.

**Table 11B.** Assessment of difference in lipidomics data between normoglycaemic and T2D patients (mixed-meal test).

|  | **Occasion:**  **Baseline** | | **Occasion:**  **Diet** | | **Occasion:**  **Surgery** | | **Occasion:**  **Recovery** | | **Effect of VLCD** | | **RYGB (1d)** | | **RYGB (6w)** | | **Cum. effect** | |
| --- | --- | --- | --- | --- | --- | --- | --- | --- | --- | --- | --- | --- | --- | --- | --- | --- |
|  | *P a* | *P b* | *P a* | *P b* | *P a* | *P b* | *P a* | *P b* | *P a* | *P b* | *P a* | *P b* | *P a* | *P b* | *P a* | *P b* |
| **CE16.0*** | 0.042 | 0.513 | 0.623 | 0.992 | 0.974 | 0.974 | 0.379 | 0.608 | 0.181 | 0.453 | 0.697 | 0.923 | 0.420 | 0.965 | 0.793 | 0.831 |
| **CE18.1*** | 0.781 | 0.898 | 0.771 | 0.992 | 0.859 | 0.905 | 0.038 | 0.502 | 0.961 | 0.978 | 0.959 | 0.984 | 0.182 | 0.965 | 0.212 | 0.306 |
| **CE18.2*** | 0.368 | 0.650 | 0.852 | 0.992 | 0.545 | 0.774 | 0.980 | 0.986 | 0.795 | 0.848 | 0.696 | 0.923 | 0.912 | 0.991 | 0.658 | 0.714 |
| **CE18.3*** | 0.084 | 0.513 | 0.745 | 0.992 | 0.335 | 0.711 | 0.470 | 0.659 | 0.198 | 0.453 | 0.835 | 0.939 | 0.525 | 0.965 | 0.320 | 0.397 |
| **CE20.4*** | 0.320 | 0.626 | 0.977 | 0.992 | 0.273 | 0.687 | 0.301 | 0.567 | 0.566 | 0.669 | 0.362 | 0.923 | 0.401 | 0.965 | 0.047 | 0.130 |
| **LPC16.0*** | 0.604 | 0.843 | 0.278 | 0.992 | 0.628 | 0.815 | 0.117 | 0.502 | 0.166 | 0.453 | 0.374 | 0.923 | 0.527 | 0.965 | 0.063 | 0.149 |
| **LPC16.1*** | 0.937 | 0.973 | 0.153 | 0.992 | 0.560 | 0.789 | 0.355 | 0.599 | 0.448 | 0.588 | 0.255 | 0.923 | 0.969 | 0.991 | 0.383 | 0.449 |
| **LPC18.0*** | 0.687 | 0.877 | 0.330 | 0.992 | 0.610 | 0.808 | 0.280 | 0.567 | 0.185 | 0.453 | 0.417 | 0.923 | 0.762 | 0.965 | 0.187 | 0.277 |
| **LPC18.1*** | 0.502 | 0.768 | 0.437 | 0.992 | 0.454 | 0.743 | 0.133 | 0.502 | 0.232 | 0.480 | 0.394 | 0.923 | 0.451 | 0.965 | 0.063 | 0.149 |
| **LPC18.2*** | 0.260 | 0.585 | 0.392 | 0.992 | 0.797 | 0.894 | 0.250 | 0.563 | 0.111 | 0.430 | 0.553 | 0.923 | 0.584 | 0.965 | 0.088 | 0.171 |
| **LPC20.3*** | 0.435 | 0.700 | 0.311 | 0.992 | 0.319 | 0.688 | 0.524 | 0.691 | 0.224 | 0.480 | 0.569 | 0.923 | 0.849 | 0.981 | 0.236 | 0.327 |
| **LPC20.4*** | 0.142 | 0.513 | 0.233 | 0.992 | 0.460 | 0.743 | 0.068 | 0.502 | 0.036 | 0.426 | 0.286 | 0.923 | 0.148 | 0.965 | 0.010 | 0.110 |
| **LPC22.6*** | 0.977 | 0.980 | 0.315 | 0.992 | 0.580 | 0.797 | 0.342 | 0.591 | 0.322 | 0.493 | 0.833 | 0.939 | 0.940 | 0.991 | 0.258 | 0.337 |
| **PC32.0*** | 0.149 | 0.513 | 0.673 | 0.992 | 0.519 | 0.774 | 0.143 | 0.502 | 0.160 | 0.453 | 0.541 | 0.923 | 0.330 | 0.965 | 0.023 | 0.110 |
| **PC32.1*** | 0.959 | 0.973 | 0.714 | 0.992 | 0.603 | 0.808 | 0.606 | 0.744 | 0.419 | 0.561 | 0.513 | 0.923 | 0.666 | 0.965 | 0.507 | 0.573 |
| **PC32.2*** | 0.770 | 0.897 | 0.999 | 0.999 | 0.069 | 0.673 | 0.974 | 0.986 | 0.974 | 0.980 | 0.219 | 0.923 | 0.959 | 0.991 | 0.638 | 0.701 |
| **PC34.0*** | 0.354 | 0.642 | 0.346 | 0.992 | 0.484 | 0.751 | 0.273 | 0.567 | 0.179 | 0.453 | 0.326 | 0.923 | 0.639 | 0.965 | 0.131 | 0.215 |
| **PC34.1*** | 0.290 | 0.599 | 0.784 | 0.992 | 0.422 | 0.743 | 0.128 | 0.502 | 0.267 | 0.490 | 0.544 | 0.923 | 0.282 | 0.965 | 0.023 | 0.110 |
| **PC34.2*** | 0.212 | 0.513 | 0.887 | 0.992 | 0.817 | 0.902 | 0.295 | 0.567 | 0.305 | 0.493 | 0.978 | 0.984 | 0.360 | 0.965 | 0.086 | 0.171 |
| **PC34.3*** | 0.817 | 0.922 | 0.913 | 0.992 | 0.663 | 0.826 | 0.313 | 0.575 | 0.782 | 0.840 | 0.764 | 0.923 | 0.494 | 0.965 | 0.253 | 0.336 |
| **PC36.1*** | 0.387 | 0.669 | 0.357 | 0.992 | 0.490 | 0.751 | 0.304 | 0.567 | 0.744 | 0.803 | 0.910 | 0.953 | 0.724 | 0.965 | 0.576 | 0.646 |
| **PC36.2*** | 0.467 | 0.725 | 0.732 | 0.992 | 0.653 | 0.826 | 0.274 | 0.567 | 0.336 | 0.506 | 0.653 | 0.923 | 0.453 | 0.965 | 0.126 | 0.211 |
| **PC36.3*** | 0.920 | 0.973 | 0.338 | 0.992 | 0.803 | 0.894 | 0.385 | 0.610 | 0.390 | 0.549 | 0.483 | 0.923 | 0.795 | 0.965 | 0.328 | 0.403 |
| **PC36.4*** | 0.337 | 0.631 | 0.410 | 0.992 | 0.372 | 0.727 | 0.041 | 0.502 | 0.194 | 0.453 | 0.315 | 0.923 | 0.189 | 0.965 | 0.032 | 0.110 |
| **PC36.5*** | 0.673 | 0.877 | 0.306 | 0.992 | 0.292 | 0.688 | 0.066 | 0.502 | 0.258 | 0.488 | 0.218 | 0.923 | 0.301 | 0.965 | 0.047 | 0.130 |
| **PC38.3*** | 0.920 | 0.973 | 0.386 | 0.992 | 0.769 | 0.894 | 0.430 | 0.636 | 0.466 | 0.594 | 0.517 | 0.923 | 0.791 | 0.965 | 0.389 | 0.449 |
| **PC38.4*** | 0.108 | 0.513 | 0.294 | 0.992 | 0.460 | 0.743 | 0.039 | 0.502 | 0.084 | 0.430 | 0.317 | 0.923 | 0.236 | 0.965 | 0.002 | 0.110 |
| **PC38.5*** | 0.331 | 0.631 | 0.556 | 0.992 | 0.611 | 0.808 | 0.399 | 0.619 | 0.197 | 0.453 | 0.511 | 0.923 | 0.797 | 0.965 | 0.208 | 0.303 |
| **PC38.6*** | 0.460 | 0.722 | 0.201 | 0.992 | 0.311 | 0.688 | 0.035 | 0.502 | 0.127 | 0.430 | 0.183 | 0.923 | 0.319 | 0.965 | 0.016 | 0.110 |
| **PC40.4*** | 0.519 | 0.769 | 0.493 | 0.992 | 0.681 | 0.826 | 0.261 | 0.567 | 0.320 | 0.493 | 0.499 | 0.923 | 0.593 | 0.965 | 0.159 | 0.244 |
| **PC40.5*** | 0.403 | 0.687 | 0.608 | 0.992 | 0.385 | 0.728 | 0.947 | 0.975 | 0.572 | 0.671 | 0.781 | 0.923 | 0.620 | 0.965 | 0.334 | 0.408 |
| **PC40.6*** | 0.642 | 0.860 | 0.314 | 0.992 | 0.362 | 0.727 | 0.057 | 0.502 | 0.241 | 0.480 | 0.276 | 0.923 | 0.380 | 0.965 | 0.025 | 0.110 |
| **SM32.1*** | 0.558 | 0.799 | 0.265 | 0.992 | 0.831 | 0.904 | 0.227 | 0.529 | 0.158 | 0.453 | 0.456 | 0.923 | 0.652 | 0.965 | 0.107 | 0.189 |
| **SM32.2*** | 0.812 | 0.922 | 0.414 | 0.992 | 0.676 | 0.826 | 0.216 | 0.529 | 0.373 | 0.543 | 0.427 | 0.923 | 0.782 | 0.965 | 0.181 | 0.270 |
| **SM33.1*** | 0.441 | 0.700 | 0.494 | 0.992 | 0.743 | 0.878 | 0.219 | 0.529 | 0.246 | 0.482 | 0.576 | 0.923 | 0.529 | 0.965 | 0.096 | 0.182 |
| **SM34.1*** | 0.206 | 0.513 | 0.958 | 0.992 | 0.576 | 0.797 | 0.186 | 0.529 | 0.293 | 0.493 | 0.730 | 0.923 | 0.294 | 0.965 | 0.048 | 0.130 |
| **SM34.2*** | 0.410 | 0.687 | 0.543 | 0.992 | 0.662 | 0.826 | 0.138 | 0.502 | 0.242 | 0.480 | 0.557 | 0.923 | 0.361 | 0.965 | 0.055 | 0.143 |
| **SM35.1*** | 0.811 | 0.922 | 0.710 | 0.992 | 0.545 | 0.774 | 0.074 | 0.502 | 0.630 | 0.717 | 0.483 | 0.923 | 0.332 | 0.965 | 0.202 | 0.296 |
| **SM36.0*** | 0.114 | 0.513 | 0.522 | 0.992 | 0.607 | 0.808 | 0.078 | 0.502 | 0.098 | 0.430 | 0.526 | 0.923 | 0.241 | 0.965 | 0.042 | 0.128 |
| **SM36.1*** | 0.201 | 0.513 | 0.830 | 0.992 | 0.656 | 0.826 | 0.225 | 0.529 | 0.305 | 0.493 | 0.685 | 0.923 | 0.235 | 0.965 | 0.151 | 0.235 |
| **SM36.2*** | 0.749 | 0.891 | 0.875 | 0.992 | 0.519 | 0.774 | 0.644 | 0.766 | 0.646 | 0.723 | 0.644 | 0.923 | 0.812 | 0.965 | 0.672 | 0.716 |
| **SM38.1*** | 0.428 | 0.698 | 0.944 | 0.992 | 0.855 | 0.905 | 0.242 | 0.553 | 0.441 | 0.583 | 0.887 | 0.953 | 0.361 | 0.965 | 0.097 | 0.182 |
| **SM38.2*** | 0.833 | 0.922 | 0.096 | 0.992 | 0.960 | 0.974 | 0.099 | 0.502 | 0.320 | 0.493 | 0.528 | 0.923 | 0.657 | 0.965 | 0.181 | 0.270 |
| **SM39.1*** | 0.280 | 0.596 | 0.300 | 0.992 | 0.820 | 0.902 | 0.306 | 0.567 | 0.141 | 0.443 | 0.756 | 0.923 | 0.697 | 0.965 | 0.132 | 0.216 |
| **SM40.0*** | 0.345 | 0.632 | 0.708 | 0.992 | 0.346 | 0.714 | 0.049 | 0.502 | 0.693 | 0.767 | 0.364 | 0.923 | 0.250 | 0.965 | 0.648 | 0.709 |
| **SM40.1*** | 0.646 | 0.860 | 0.631 | 0.992 | 0.792 | 0.894 | 0.405 | 0.619 | 0.401 | 0.551 | 0.687 | 0.923 | 0.680 | 0.965 | 0.242 | 0.331 |
| **SM40.2*** | 0.947 | 0.973 | 0.970 | 0.992 | 0.878 | 0.914 | 0.187 | 0.529 | 0.903 | 0.949 | 0.901 | 0.953 | 0.373 | 0.965 | 0.105 | 0.189 |
| **SM41.1*** | 0.618 | 0.852 | 0.278 | 0.992 | 0.784 | 0.894 | 0.496 | 0.672 | 0.217 | 0.480 | 0.680 | 0.923 | 0.983 | 0.994 | 0.287 | 0.369 |
| **SM41.2*** | 0.302 | 0.604 | 0.223 | 0.992 | 0.787 | 0.894 | 0.113 | 0.502 | 0.097 | 0.430 | 0.424 | 0.923 | 0.529 | 0.965 | 0.043 | 0.128 |
| **SM42.1*** | 0.653 | 0.860 | 0.247 | 0.992 | 0.835 | 0.904 | 0.448 | 0.657 | 0.108 | 0.430 | 0.229 | 0.923 | 0.566 | 0.965 | 0.258 | 0.337 |
| **SM42.2*** | 0.678 | 0.877 | 0.418 | 0.992 | 0.674 | 0.826 | 0.064 | 0.502 | 0.320 | 0.493 | 0.486 | 0.923 | 0.321 | 0.965 | 0.029 | 0.110 |
| **SM42.3*** | 0.292 | 0.599 | 0.737 | 0.992 | 0.578 | 0.797 | 0.071 | 0.502 | 0.287 | 0.493 | 0.619 | 0.923 | 0.222 | 0.965 | 0.020 | 0.110 |
| **SM43.1*** | 0.531 | 0.774 | 0.159 | 0.992 | 0.367 | 0.727 | 0.824 | 0.885 | 0.477 | 0.600 | 0.995 | 0.995 | 0.481 | 0.965 | 0.702 | 0.744 |
| **SM43.2*** | 0.754 | 0.891 | 0.645 | 0.992 | 0.534 | 0.774 | 0.096 | 0.502 | 0.632 | 0.717 | 0.475 | 0.923 | 0.175 | 0.965 | 0.041 | 0.128 |
| **SM44.2*** | 0.753 | 0.891 | 0.462 | 0.992 | 0.692 | 0.834 | 0.617 | 0.744 | 0.515 | 0.634 | 0.515 | 0.923 | 0.809 | 0.965 | 0.508 | 0.573 |
| **TG48.1*** | 0.962 | 0.973 | 0.281 | 0.992 | 0.422 | 0.743 | 0.683 | 0.786 | 0.638 | 0.720 | 0.249 | 0.923 | 0.394 | 0.965 | 0.951 | 0.956 |
| **TG48.2*** | 0.620 | 0.852 | 0.538 | 0.992 | 0.545 | 0.774 | 0.621 | 0.744 | 0.515 | 0.634 | 0.483 | 0.923 | 0.980 | 0.994 | 0.343 | 0.413 |
| **TG50.0*** | 0.826 | 0.922 | 0.706 | 0.992 | 0.282 | 0.688 | 0.737 | 0.817 | 0.708 | 0.779 | 0.831 | 0.939 | 0.788 | 0.965 | 0.830 | 0.849 |
| **TG50.1*** | 0.418 | 0.687 | 0.545 | 0.992 | 0.443 | 0.743 | 0.696 | 0.786 | 0.297 | 0.493 | 0.466 | 0.923 | 0.964 | 0.991 | 0.290 | 0.370 |
| **TG50.2*** | 0.701 | 0.884 | 0.441 | 0.992 | 0.864 | 0.905 | 0.199 | 0.529 | 0.456 | 0.590 | 0.564 | 0.923 | 0.551 | 0.965 | 0.126 | 0.211 |
| **TG50.3*** | 0.602 | 0.843 | 0.439 | 0.992 | 0.843 | 0.904 | 0.117 | 0.502 | 0.361 | 0.532 | 0.555 | 0.923 | 0.450 | 0.965 | 0.072 | 0.156 |
| **TG50.4*** | 0.741 | 0.891 | 0.905 | 0.992 | 0.615 | 0.808 | 0.478 | 0.662 | 0.719 | 0.785 | 0.771 | 0.923 | 0.886 | 0.981 | 0.315 | 0.393 |
| **TG52.1*** | 0.777 | 0.898 | 0.593 | 0.992 | 0.249 | 0.673 | 0.456 | 0.659 | 0.972 | 0.980 | 0.585 | 0.923 | 0.437 | 0.965 | 0.414 | 0.473 |
| **TG52.2*** | 0.506 | 0.768 | 0.579 | 0.992 | 0.258 | 0.673 | 0.027 | 0.502 | 0.376 | 0.543 | 0.366 | 0.923 | 0.147 | 0.965 | 0.004 | 0.110 |
| **TG52.3*** | 0.373 | 0.650 | 0.500 | 0.992 | 0.420 | 0.743 | 0.054 | 0.502 | 0.227 | 0.480 | 0.419 | 0.923 | 0.269 | 0.965 | 0.007 | 0.110 |
| **TG52.4*** | 0.332 | 0.631 | 0.442 | 0.992 | 0.721 | 0.860 | 0.076 | 0.502 | 0.184 | 0.453 | 0.521 | 0.923 | 0.400 | 0.965 | 0.019 | 0.110 |
| **TG52.5*** | 0.469 | 0.725 | 0.847 | 0.992 | 0.974 | 0.974 | 0.119 | 0.502 | 0.362 | 0.532 | 0.915 | 0.953 | 0.261 | 0.965 | 0.064 | 0.149 |
| **TG54.3*** | 0.655 | 0.860 | 0.899 | 0.992 | 0.837 | 0.904 | 0.009 | 0.502 | 0.583 | 0.675 | 0.838 | 0.939 | 0.040 | 0.965 | 0.010 | 0.110 |
| **TG54.4*** | 0.313 | 0.618 | 0.592 | 0.992 | 0.763 | 0.894 | 0.032 | 0.502 | 0.237 | 0.480 | 0.911 | 0.953 | 0.209 | 0.965 | 0.005 | 0.110 |
| **TG54.5*** | 0.231 | 0.542 | 0.639 | 0.992 | 0.972 | 0.974 | 0.023 | 0.502 | 0.233 | 0.480 | 0.814 | 0.939 | 0.174 | 0.965 | 0.003 | 0.110 |
| **TG54.6*** | 0.914 | 0.973 | 0.533 | 0.992 | 0.958 | 0.974 | 0.224 | 0.529 | 0.649 | 0.723 | 0.700 | 0.923 | 0.788 | 0.965 | 0.220 | 0.314 |
| **TG56.6*** | 0.281 | 0.596 | 0.626 | 0.992 | 0.671 | 0.826 | 0.013 | 0.502 | 0.231 | 0.480 | 0.614 | 0.923 | 0.092 | 0.965 | 0.005 | 0.110 |

Mixed-meal tests for each metabolite were estimated as the incremental area under the curve (iAUC) using the time points 0, 30, and 90 min. P a, p-value as estimated by unequal variances t-test; P b, p-value as estimated by unequal variances t-test adjusted for multiple testing according to the false discovery rate method. VLCD, very low-calorie diet; RYGB (1d), immediate effect of gastric bypass surgery; RYGB (6w), 6-week effect of gastric bypass surgery; Cum. Effect, cumulative effect of the intervention.
